# Supplementary material for: Persistent SOMAtic symptoms ACROSS diseases — from risk factors to modification: scientific framework and overarching protocol of the interdisciplinary SOMACROSS research unit (RU 5211)
Source: PubMed Central journal article supplement — BMJ Open. 2022 Jan 21;12(1):e057596. doi: 10.1136/bmjopen-2021-057596 (PMC8785206; doi:10.1136/bmjopen-2021-057596), 2022-01-21
Supplement: bmjopen-2021-057596.draft_revisions.pdf [file bmjopen-2021-057596.draft_revisions.pdf]

# BMJ Open

BMJ Open is committed to open peer review. As part of this commitment we make the peer review history of every article we publish publicly available.

When an article is published we post the peer reviewers' comments and the authors' responses online. We also post the versions of the paper that were used during peer review. These are the versions that the peer review comments apply to.

The versions of the paper that follow are the versions that were submitted during the peer review process. They are not the versions of record or the final published versions. They should not be cited or distributed as the published version of this manuscript.

BMJ Open is an open access journal and the full, final, typeset and author-corrected version of record of the manuscript is available on our site with no access controls, subscription charges or pay-per-view fees (<http://bmjopen.bmj.com>).

If you have any questions on BMJ Open's open peer review process please email [info.bmjopen@bmj.com](mailto:info.bmjopen@bmj.com)

# BMJ Open

## Persistent SOMatic Symptoms ACROSS Diseases - From Risk Factors to Modification: Protocol of the Interdisciplinary SOMACROSS Research Unit (RU 5211)

|                               |                                                                                                                                                                                                                                                                                                                                                                                                                                                                                                                                                                                                                                                                                                                                                                                                                                                                                                                                                                                                                                                                                                                                                                                                                                                                                                                                                                                                                                                                                                                                                                                                                                                                                                                                                                                                                              |
|-------------------------------|------------------------------------------------------------------------------------------------------------------------------------------------------------------------------------------------------------------------------------------------------------------------------------------------------------------------------------------------------------------------------------------------------------------------------------------------------------------------------------------------------------------------------------------------------------------------------------------------------------------------------------------------------------------------------------------------------------------------------------------------------------------------------------------------------------------------------------------------------------------------------------------------------------------------------------------------------------------------------------------------------------------------------------------------------------------------------------------------------------------------------------------------------------------------------------------------------------------------------------------------------------------------------------------------------------------------------------------------------------------------------------------------------------------------------------------------------------------------------------------------------------------------------------------------------------------------------------------------------------------------------------------------------------------------------------------------------------------------------------------------------------------------------------------------------------------------------|
| Journal:                      | <i>BMJ Open</i>                                                                                                                                                                                                                                                                                                                                                                                                                                                                                                                                                                                                                                                                                                                                                                                                                                                                                                                                                                                                                                                                                                                                                                                                                                                                                                                                                                                                                                                                                                                                                                                                                                                                                                                                                                                                              |
| Manuscript ID                 | bmjopen-2021-057596                                                                                                                                                                                                                                                                                                                                                                                                                                                                                                                                                                                                                                                                                                                                                                                                                                                                                                                                                                                                                                                                                                                                                                                                                                                                                                                                                                                                                                                                                                                                                                                                                                                                                                                                                                                                          |
| Article Type:                 | Protocol                                                                                                                                                                                                                                                                                                                                                                                                                                                                                                                                                                                                                                                                                                                                                                                                                                                                                                                                                                                                                                                                                                                                                                                                                                                                                                                                                                                                                                                                                                                                                                                                                                                                                                                                                                                                                     |
| Date Submitted by the Author: | 21-Sep-2021                                                                                                                                                                                                                                                                                                                                                                                                                                                                                                                                                                                                                                                                                                                                                                                                                                                                                                                                                                                                                                                                                                                                                                                                                                                                                                                                                                                                                                                                                                                                                                                                                                                                                                                                                                                                                  |
| Complete List of Authors:     | <p>Löwe, Bernd; University Medical Center Hamburg-Eppendorf, Department of Psychosomatic Medicine and Psychotherapy<br/>         Andresen, Viola; Israelitisches Krankenhaus Hamburg<br/>         Van den Bergh, Omer; KU Leuven, Health Psychology<br/>         Huber, Tobias B.; University Medical Center Hamburg-Eppendorf, III. Department of Medicine<br/>         von dem Knesebeck, Olaf; University Medical Center Hamburg-Eppendorf, Medical Sociology<br/>         Lohse, Ansgar W.; University Medical Center Hamburg-Eppendorf, I. Department of Medicine<br/>         Nestoriuc, Yvonne; Helmut-Schmidt-University / University of the Armed Forces Hamburg, Department of Psychology; University Medical Center Hamburg-Eppendorf<br/>         Schneider, Gudrun; Universitätsklinikum Münster, Department of Psychosomatic Medicine and Psychotherapy<br/>         Schneider, Stefan W.; University Medical Center Hamburg-Eppendorf, Department of Dermatology and Venerology<br/>         Schramm, Christoph; University Medical Center Hamburg-Eppendorf, I. Department of Medicine; University Medical Center Hamburg-Eppendorf, Martin Zeitz Center for Rare Diseases<br/>         Ständer, Sonja; Universitätsklinikum Münster, Department of Dermatology<br/>         Vettorazzi, Eik; University Medical Center Hamburg-Eppendorf, Medical Biometry and Epidemiology<br/>         Zapf, Antonia ; University Medical Center Hamburg-Eppendorf, Medical Biometry and Epidemiology<br/>         Shedden-Mora, Meike; MSH Medical School Hamburg, Department of Psychology; University Medical Center Hamburg-Eppendorf, Department of Psychosomatic Medicine and Psychotherapy<br/>         Toussaint, Anne; University Medical Center Hamburg-Eppendorf, Psychosomatic Medicine and Psychotherapy</p> |
| Keywords:                     | <p>Adult dermatology &lt; DERMATOLOGY, Functional bowel disorders &lt; GASTROENTEROLOGY, Gastroenterology &lt; INTERNAL MEDICINE, Hepatology &lt; INTERNAL MEDICINE, Chronic renal failure &lt; NEPHROLOGY, Adult psychiatry &lt; PSYCHIATRY</p>                                                                                                                                                                                                                                                                                                                                                                                                                                                                                                                                                                                                                                                                                                                                                                                                                                                                                                                                                                                                                                                                                                                                                                                                                                                                                                                                                                                                                                                                                                                                                                             |
|                               |                                                                                                                                                                                                                                                                                                                                                                                                                                                                                                                                                                                                                                                                                                                                                                                                                                                                                                                                                                                                                                                                                                                                                                                                                                                                                                                                                                                                                                                                                                                                                                                                                                                                                                                                                                                                                              |

1  
2  
3  
4  
5  
6  
7  
8  
9  
10  
11  
12  
13  
14  
15  
16  
17  
18  
19  
20  
21  
22  
23  
24  
25  
26  
27  
28  
29  
30  
31  
32  
33  
34  
35  
36  
37  
38  
39  
40  
41  
42  
43  
44  
45  
46  
47  
48  
49  
50  
51  
52  
53  
54  
55  
56  
57  
58  
59  
60

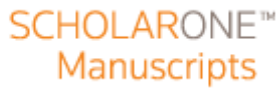

1  
2  
3 **Persistent SOMAtic Symptoms ACROSS Diseases - From Risk Factors to**  
4 **Modification: Protocol of the Interdisciplinary SOMACROSS Research Unit**  
5  
6  
7 **(RU 5211)**  
8  
9  
10

11 *Hamburg, Germany, September 16, 2021, Version 2.1*  
12  
13  
14  
15

16 Bernd Löwe, MD<sup>a</sup>; Viola Andresen, MD<sup>b</sup>; Omer Van den Bergh, PhD<sup>c</sup>; Tobias B. Huber, MD<sup>d</sup>;  
17  
18 Olaf von dem Knesebeck, PhD<sup>e</sup>; Ansgar W. Lohse, MD<sup>f</sup>; Yvonne Nestoriuc, PhD<sup>g,h</sup>; Gudrun  
19  
20 Schneider, MD<sup>i</sup>; Stefan W. Schneider, MD<sup>i</sup>; Christoph Schramm, MD<sup>f,k</sup>; Sonja Ständer, MD<sup>i</sup>;  
21  
22 Eik Vettorazzi<sup>m</sup>, Antonia Zapf, PhD<sup>m</sup>, Meike Shedden-Mora,\* PhD<sup>a,n</sup>, Anne Toussaint,\* PhD<sup>a</sup>  
23  
24 \* shared last authorship; both authors contributed equally  
25  
26  
27

28  
29 <sup>a</sup> Department of Psychosomatic Medicine and Psychotherapy, University Medical Centre Hamburg-  
30 Eppendorf, Hamburg, Germany  
31

32 <sup>b</sup> Israelitisches Krankenhaus, Hamburg, Germany  
33

34 <sup>c</sup> Health Psychology, University of Leuven, Leuven, Belgium  
35

36 <sup>d</sup> III. Department of Medicine, University Medical Centre Hamburg-Eppendorf, Hamburg, Germany  
37

38 <sup>e</sup> Institute of Medical Sociology, University Medical Centre Hamburg-Eppendorf, Hamburg, Germany  
39

40 <sup>f</sup> I. Department of Medicine, University Medical Centre Hamburg-Eppendorf, Hamburg, Germany  
41

42 <sup>g</sup> Helmut-Schmidt-University, University of the Federal Armed Forces, Hamburg, Germany  
43

44 <sup>h</sup> Systems Neuroscience, University Medical Centre Hamburg-Eppendorf, Hamburg, Germany  
45

46 <sup>i</sup> Department of Psychosomatic Medicine and Psychotherapy, University Hospital Münster, Germany  
47

48 <sup>j</sup> Department of Dermatology and Venerology, University Medical Centre Hamburg-Eppendorf,  
49 Hamburg, Germany  
50

51 <sup>k</sup> Martin Zeitz Center for Rare Diseases, University Medical Centre Hamburg-Eppendorf, Hamburg,  
52 Germany  
53

54 <sup>l</sup> Centre of Chronic Pruritus, Department of Dermatology, University Hospital Münster, Germany  
55

56 <sup>m</sup> Department of Medical Biometry and Epidemiology, University Medical Centre Hamburg-Eppendorf,  
57 Hamburg, Germany  
58  
59

60 <sup>n</sup> Department of Psychology, Medical School Hamburg, Hamburg, Germany

1  
2  
3  
4  
5 **Address for correspondence:**  
6

7 Bernd Löwe, MD; Professor of Medicine  
8

9 Department of Psychosomatic Medicine and Psychotherapy  
10

11 University Medical Centre Hamburg-Eppendorf  
12

13 Martinistraße 52, 20246 Hamburg, Germany  
14

15 Phone: +49-40-7410-59733, Fax: +49-40-7410-54975, E-mail: b.loewe@uke.de  
16  
17

18  
19 Word count: 3997 words (not including abstract, tables, and references), 2 tables, 4 figures  
20  
21

22  
23  
24 Please note: This study protocol of the SOMACROSS research unit has undergone  
25  
26 independent peer review to gain funding from the German Research Foundation (Deutsche  
27  
28 Forschungsgemeinschaft, DFG). The SOMACROSS research unit is funded by the German  
29  
30 Research Foundation (<https://gepris.dfg.de/gepris/projekt/445297796>) from September 2021  
31  
32 to August 2025. All individual projects of the research unit have received formal ethical  
33  
34 approval by the Ethics Committee of the Hamburg Medical Association, Hamburg, Germany,  
35  
36 on January 25, 2021, and the Ethics Committee of the Medical Association of Westphalia-  
37  
38 Lippe / Westphalian Wilhelms University, Münster, Germany on October 9, 2020.  
39  
40

41  
42  
43 Reference numbers of the Ethics Committee of the Hamburg Medical Association, Hamburg,  
44  
45 Germany:  
46

47 Project 1: 2020-10196-BO-ff, Project 2: 2020-10198-BO-ff, Project 3: 2020-10195-BO-ff,  
48

49 Project 4: 2020-10200-BO-ff, Project 5: 2020-10197-BO-ff, Project 6: 2020-10194-BO-ff  
50  
51

52  
53 Reference number of the Ethics Committee of the Medical Association of Westphalia-Lippe /  
54  
55 Westphalian Wilhelms University, Münster, Germany:  
56

57 Project 4: 2020-676-f-S  
58  
59  
60

**ABSTRACT:**

Introduction: Persistent Somatic Symptoms (PSS) are highly prevalent in all areas of medicine; they are disabling for patients and costly for society. The subjective symptom burden often correlates poorly with the underlying disease severity, and patients' needs for effective treatment are far from being met. Initial evidence indicates that, in addition to disease-specific pathophysiological processes, psychological factors such as expectations, somatosensory amplification, and prior illness experiences contribute to symptom persistence in functional as well as in somatic diseases. However, prospective studies investigating the transition from acute to chronic somatic symptoms, integrating pathophysiological, psychological, and social factors, are scarce. A better understanding of the multifactorial mechanisms of symptom persistence is crucial to develop targeted mechanism-based interventions for effective prevention and treatment of PSS. Thus, the overall aim of the interdisciplinary SOMACROSS research unit is to identify generic and disease-specific risk factors and aetiological mechanisms of symptom persistence across a range of diseases.

Methods and analysis: Seven projects will investigate risk factors and mechanisms of symptom persistence in a total of 3,916 patients across ten medical conditions. All study designs are prospective and share common assessment points, core instruments, and outcome variables to allow comparison and validation of results across projects and conditions. Research will focus on the identification of generic and disease-specific mechanisms associated with unfavourable symptom course. The development of a multivariate prediction model will facilitate the understanding of the course of PSS across diseases.

Ethics and dissemination: All individual SOMACROSS studies were approved by the ethics committees of Hamburg and Münster, Germany. Findings will be disseminated through peer-reviewed publications, scientific conferences, and involvement of relevant stakeholders, patients and the lay public. This interdisciplinary research unit will fundamentally contribute to

1  
2  
3 earlier recognition of patients at risk, and to the development of prevention and tailored  
4  
5 treatment concepts for PSS.  
6  
7  
8

9  
10 **Key words**

11 Persistent Somatic Symptoms; Mechanisms; Risk Factors; Expectations; Research Unit;  
12  
13 Biopsychosocial Models; Prediction Models  
14  
15  
16  
17  
18  
19  
20  
21  
22  
23  
24  
25  
26  
27  
28  
29  
30  
31  
32  
33  
34  
35  
36  
37  
38  
39  
40  
41  
42  
43  
44  
45  
46  
47  
48  
49  
50  
51  
52  
53  
54  
55  
56  
57  
58  
59  
60

For peer review only

## STRENGTHS AND LIMITATIONS OF THIS STUDY

- Although persistent somatic symptoms (PSS) are highly prevalent among various diseases, distressing and disabling for patients and costly for society, mechanisms of symptom persistence are rarely investigated and poorly understood.
- The SOMACROSS research unit goes beyond previous research by determining the complex and dynamic biopsychosocial interplay contributing to persistent symptom states in a number of different syndromes and diseases.
- In order to detect patterns of symptom persistence across diseases, the SOMACROSS research unit aims to identify potential risk factors and mechanisms of PSS across various somatic diseases, functional syndromes and somatoform disorders using a common working model, joint core measures, prospective designs and coordinated evaluation methods.
- The SOMACROSS research unit uses a multidisciplinary approach to overcome today's highly fragmented research on PSS and provide pathways to developing efficient disease-overarching intervention strategies.
- Despite investigating multiple potential risk factors and mechanisms of the persistence of somatic symptoms, other variables might be relevant; and conclusions can only be drawn for the conditions under investigation.



## INTRODUCTION

### State of the art

#### Definition: Persistent Somatic Symptoms (PSS)

The term 'Persistent Somatic Symptoms (PSS)' is used as an umbrella term to describe subjectively distressing somatic complaints, irrespective of their aetiology, that are present on most days for at least several months. PSS are operationalised by repeated measures of patients' subjective somatic symptom severity.

PSS across medical fields: PSS are highly prevalent in all fields of medicine, from primary to specialized care and mental health care,<sup>1 2</sup> yet remain greatly neglected in research.<sup>3</sup>

Complaints may include pain, gastroenterological, cardiovascular, genito-urinary, neurological or other symptoms (**Figure 1**). Regardless of their aetiology, PSS cause substantial suffering, impaired quality of life and work participation.<sup>4 5</sup> Many somatic symptoms are neither exclusive correlates of somatic disease (e.g., vascular or inflammatory disease) nor exclusive symptoms of a mental disorder (e.g., depressive or anxiety disorders).<sup>2 6 7</sup> Thus, a dualistic view classifying symptoms as either somatic or psychological is neither evidence-based nor patient-centred.<sup>8</sup> With reference to the description of bodily distress disorder in the International Classification of Diseases, 11<sup>th</sup> edition (ICD-11), the term 'persistent' here defines somatic symptoms which are present on most days for at least several months.<sup>9</sup>

*Please insert **Figure 1** approximately here*

Impact on patients – challenges in health care: Eighty percent of the general population experience one or more symptoms within one month.<sup>10-12</sup> Somatic symptoms account for the majority of all primary and secondary care consultations.<sup>13 14</sup> Whereas in most cases, symptoms fluctuate naturally and eventually disappear, about one fourth of individuals with acute symptoms develop PSS and remain affected one year after their first consultation.<sup>8</sup>

1  
2  
3 Often, these symptoms are accompanied by comorbid depression and anxiety<sup>2</sup> and an  
4 increased risk for suicidal ideation and attempts.<sup>15 16</sup> PSS are costly for society,<sup>17 18</sup> and  
5 health care for PSS is challenging.<sup>19</sup> The clinical reality is characterized by fragmented  
6 treatment in specialized care (e.g., gastrointestinal symptoms in gastroenterology, chest pain  
7 in cardiology), even though patients often report multiple or overlapping symptoms.<sup>20</sup>  
8  
9  
10  
11  
12  
13  
14

#### From 'medically unexplained' to a broader understanding of distressing persistent somatic

15  
16 symptoms: Most research on PSS has been conducted on so called 'medically unexplained  
17 symptoms', a term mainly used in primary care, while specialised medical fields more  
18 commonly employ the term 'functional syndromes'.<sup>21</sup> The 'medical inexplicability' of the  
19 symptoms was also the defining diagnostic criterion of the earlier diagnosis of somatoform  
20 and related disorders in the Diagnostic and Statistical Manual for Mental Disorders, 4th  
21 edition (DSM-IV),<sup>22</sup> and the International Classification of Diseases, 10th edition (ICD-10).<sup>23</sup>  
22 The concept of medical inexplicability of somatic symptoms is considered problematic  
23 because (1) the label 'medically unexplained' for disabling symptoms creates distress in  
24 patients<sup>24</sup>, (2) the reliability of assessing whether or not there is a pathophysiological  
25 explanation for a certain symptom is notoriously poor, (3) the concept reinforces a mind-  
26 body-dualism.<sup>8</sup>, and (4) many patients disapproved of the term.<sup>25</sup> Therefore, a new  
27 conceptualization was introduced namely Somatic Symptom Disorder (SSD in DSM-5)<sup>26</sup> and  
28 Bodily Distress Disorder (BDD in ICD-10),<sup>9</sup> incorporating features of persistent and clinically  
29 significant somatic complaints which are accompanied by excessive and disproportionate  
30 health-related concerns, feelings, and behaviours. SSD and BDD may or may not be  
31 accompanied by a somatic disease.<sup>27</sup> Of note, patients with 'medically explained' and  
32 'unexplained' symptoms are equally impaired.<sup>4 5</sup>  
33  
34  
35  
36  
37  
38  
39  
40  
41  
42  
43  
44  
45  
46  
47  
48  
49  
50  
51  
52  
53  
54

#### Transferability of psychosocial aetiological mechanisms from functional and somatoform

55  
56 disorders to somatic diseases: Most research on aetiological mechanisms of PSS has been  
57 conducted in somatoform and functional syndromes. The question arises whether these  
58  
59  
60

1  
2  
3 findings can be transferred to SSD and BDS, and beyond that, to PSS in somatic diseases.  
4  
5 There is initial evidence that – in addition to the underlying pathophysiology – psychosocial  
6  
7 factors play a relevant role in the development and persistence of symptoms in somatic  
8  
9 diseases. For example, previous studies by our group indicated that patients' beliefs about  
10  
11 their disease strongly influence recovery after coronary artery bypass surgery,<sup>28</sup> that pre-  
12  
13 treatment expectations significantly predict patient-reported long-term side-effects and quality  
14  
15 of life in women receiving endocrine breast cancer treatment,<sup>29</sup> and that the extent of illness  
16  
17 anxiety before gastrointestinal infection predicts the development of post-infectious irritable  
18  
19 bowel syndrome after seven months.<sup>30</sup> The understanding of psychosocial factors, in turn,  
20  
21 can help improve treatment for patients with PSS. First evidence in support of this is  
22  
23 available from the PSY-HEART trial, a three-arm randomized clinical trial in which a  
24  
25 preoperative optimisation of patient expectations prior to coronary artery bypass graft surgery  
26  
27 led to a reduction of post-operative disability compared to usual surgery care alone.<sup>31</sup>  
28  
29 Even though it remains unclear how PSS evolve and are maintained over time, their  
30  
31 presence in various somatic diseases is associated with a faster disease progression, more  
32  
33 severe complications, and increased mortality.<sup>32-34</sup> Further evidence supporting the important  
34  
35 role of psychosocial factors in the persistence of symptoms in somatic diseases is provided  
36  
37 by the observation that symptom burden frequently persists although the underlying  
38  
39 pathophysiology has been optimally treated.<sup>5 35</sup> In addition to disease-specific treatment,  
40  
41 psychological treatment and centrally acting pharmacotherapy appear to be the most  
42  
43 promising options, not only for functional and somatoform disorders but also for PSS in well-  
44  
45 defined somatic diseases.<sup>19</sup> This suggests that generic, trans-diagnostic treatment  
46  
47 principles<sup>36</sup> may be valuable in addition to the disease-specific treatment of the underlying  
48  
49 pathophysiology. Across somatic diseases, a diverse array of psychological and social  
50  
51 factors needs to be considered on equal footing with biological factors in their roles as  
52  
53 potential risk factors, protective factors, and maintaining factors of PSS. Importantly,  
54  
55 psychological and social factors are not solely secondary reactions to persistent symptoms;  
56  
57 rather, they are deeply woven into the biopsychosocial processes that lead to PSS.  
58  
59  
60

To conclude, sufficient evidence warrants the assumption that aetiological mechanisms derived from research on somatoform and functional disorders also contribute to the persistence of symptoms in somatic diseases. However, the applicability of generic and specific risk factors and mechanisms of PSS across medical diseases has yet to be investigated.

Current aetiological knowledge on PSS: The aetiology of PSS across somatic diseases is not well understood. The unique way in which each individual perceives a somatic symptom and its severity, the expectation on how the symptom will evolve, and whether the treatment will be effective depends on the constellation of biological, psychological, and social factors. The comprehensive vulnerability-stress model by Henningsen et al.<sup>19</sup> defines predisposing, triggering, and maintaining/aggravating factors that determine the transition from short-term to persistent disabling symptoms. After extensively reviewing the literature for all targeted conditions included in the SOMACROSS research unit (RU), we developed a 'PSS working model' as a starting point for the investigation of disease-overarching generic and disease-specific risk factors and aetiological mechanisms (see **Figure 2**). The risk factors and aetiological mechanisms described below are considered most relevant to PSS:

#### Definitions: risk factors and aetiological mechanisms

'Risk factors' refer to variables associated with an increased risk of symptom persistence, although the relationship is not necessarily causal. 'Aetiological mechanisms' denote underlying mechanisms which are presumed to be causally involved in the persistence of symptoms.

- a. Predisposing factors for PSS include sociodemographic risk factors such as female gender,<sup>37</sup> poor education and socioeconomic status,<sup>3 38</sup> sociocultural factors,<sup>39</sup> psychological aspects such as early adverse life experiences,<sup>40-43</sup> personality factors like

1  
2  
3 neuroticism and negative affectivity,<sup>44</sup> biomedical factors such as prior medical  
4 diseases,<sup>44</sup> certain (epi)genetic profiles,<sup>45</sup> and immunological correlates of these factors.<sup>3</sup>

5  
6  
7 46 47  
8  
9

- 10  
11  
12 b. Triggering factors for short-term somatic symptoms include acute infections, injuries,  
13 medical or surgical procedures, or current life stressors.<sup>19 30</sup>  
14  
15  
16  
17  
18 c. Maintaining/aggravating factors: Most aetiological models on bodily complaints in  
19 somatoform and functional disorders<sup>48-50</sup> include the following core cognitive-perceptual  
20 and emotional mechanisms: selective attention towards interoceptive cues, amplified  
21 perception of bodily sensations, catastrophizing cognitive interpretations, somatosensory  
22 amplification,<sup>51</sup> and dysfunctional illness behaviours.<sup>19 46 52</sup> Affective factors such as  
23 alexithymia comprise deficits in the regulation of emotions.<sup>53</sup> On the level of  
24 dysfunctional behavioural processes, somatic symptoms are aggravated by learning  
25 processes, avoidance behaviour such as physical inactivity and subsequent  
26 deconditioning.<sup>54-56</sup> Further aggravating factors arise from unsatisfying encounters with  
27 the health care system, negative illness perceptions, and treatment experiences which  
28 result in the unnecessary and potentially harmful overuse of health care.<sup>19</sup> Social factors  
29 like work status, health literacy, access to medical care, stigmatisation, migration, and  
30 culture can be both predisposing and maintaining/aggravating factors of PSS.<sup>57</sup> Disease-  
31 specific biomedical factors (e.g., inflammation in inflammatory bowel disease) naturally  
32 influence the course of somatic symptom severity.<sup>58</sup> Additionally, disease-overarching  
33 psychobiological models postulate dysregulations of the endocrine, immune, and  
34 autonomic nervous systems as well as central sensitization to be potential links between  
35 psychosocial distress and PSS.<sup>48 59</sup> Other biopsychosocial interactions contributing to  
36 symptom persistence include treatment-related factors such as burdensome side effects  
37 of a treatment for an underlying disease. These side effects are difficult to disentangle  
38 from general bodily distress and likely to be influenced by nocebo effects through  
39  
40  
41  
42  
43  
44  
45  
46  
47  
48  
49  
50  
51  
52  
53  
54  
55  
56  
57  
58  
59  
60

1  
2  
3 patients' negative expectations and other psychological factors.<sup>60</sup> Central sensitization,  
4 defined as hyperexcitability of the central nervous system, has been suggested to  
5 contribute to the development and maintenance of chronic pain, while its role in other  
6 PSS is under debate.<sup>61 62</sup> Central sensitization is thought to be driven by  
7 neuroinflammation in the central and peripheral nervous system, as indicated by higher  
8 serum levels of interleukin 6 (IL-6) and tumour necrosis factor (TNF).<sup>61</sup> Recently,  
9 epigenetic modifications such as DNA methylation have been identified as potential  
10 contributors to altered resilience to environmental stress, pain, and somatic symptom  
11 burden.<sup>38 63</sup> Stool microbiota alterations are also hypothesized to be associated with the  
12 persistence of somatic symptoms. There is evidence of gut microbiota dysbiosis in  
13 patients with chronic fatigue and nonvisceral pain.<sup>64 65</sup>

- 14  
15  
16  
17  
18  
19  
20  
21  
22  
23  
24  
25  
26  
27  
28 d. Interactions of biopsychosocial factors: Recently, patients' expectations of symptoms  
29 have come into focus as having a central role in symptom processing and the relation  
30 between biological, psychosocial and treatment-related factors for persistent symptom  
31 development. Expectations are defined as future-directed cognitions regarding the  
32 anticipated course of symptoms.<sup>66</sup> As such, they constitute a common denominator of  
33 many psychological risk factors for PSS such as catastrophizing, illness perceptions and  
34 health anxiety. Thus, they can be regarded as a core feature of current aetiological  
35 models for PSS (e.g., somatosensory amplification).<sup>46</sup> Negative symptom expectations  
36 interact with actual somatic input and can fuel dysfunctional signal processing and the  
37 development of persistent symptoms. Relevantly, the power of expectations to predict  
38 symptom course, treatment benefit and negative treatment side effects has been  
39 demonstrated for a wide range of medical and psychological conditions, e.g., pain,  
40 rheumatoid arthritis, cancer, 'medically unexplained symptoms' and level of functioning  
41 after total hip and knee replacements.<sup>29 67-71</sup> Moreover, a growing body of research  
42 provides evidence that modifying expectations improves clinical outcomes.<sup>31 72 73</sup>

1  
2  
3 Expectations are also prominently conceptualized in emerging predictive processing  
4 models which suggest that symptom perception emerges through an integrative process  
5 of sensory input, prior experience (leading to implicit expectations, or “priors”) and  
6 contextual cues (such as affective state).<sup>74</sup> These models show that the relationship  
7 between subjective symptoms and pathophysiological dysfunction is highly variable, both  
8 between and within individuals, and that pathophysiological dysfunction may even be  
9 completely absent in the presence of strong priors and ambiguous somatic input.  
10  
11 Depending on relative strength and precision, the actual symptom experience may be  
12 more determined by somatic input or by priors.  
13  
14  
15  
16  
17  
18  
19  
20  
21  
22  
23

24 Altogether, the above mentioned risk factors and mechanisms of somatic symptom  
25 persistence are less well studied in somatic diseases than in functional and somatoform  
26 disorders.<sup>46</sup> We assume that – in addition to disease-specific pathophysiological mechanisms  
27 – the processes underlying somatic symptom persistence in somatic diseases and in  
28 functional/somatoform disorders involve similar risk factors and mechanisms, opening new  
29 routes to modify symptom persistence in somatic diseases.  
30  
31  
32  
33  
34  
35  
36  
37  
38

### 39 **Novelty and innovation**

40 SOMACROSS takes on a fundamentally new perspective, by including two new ways of  
41 thinking in medicine: First, the abandonment of the concept of medical inexplicability in the  
42 diagnostic concepts of functional and somatoform disorders; and second, the shift away from  
43 the idea that subjective suffering can essentially be explained by the extent of the underlying  
44 physiological pathology. Assuming that biological markers alone do not sufficiently explain  
45 aetiology and development of PSS, we will investigate the interaction of biological,  
46 psychological and social factors regarding their contribution to subjective symptom severity  
47 and symptom persistence in ten different medical conditions. In this way, SOMACROSS will  
48 critically challenge the still prevalent dualistic mind-body disease model in medicine. The use  
49 of a trans-symptomatic and trans-diagnostic approach will enable the identification of  
50  
51  
52  
53  
54  
55  
56  
57  
58  
59  
60

1  
2  
3 patterns, risk factors and aetiological mechanisms of symptom persistence across diseases  
4  
5 and syndromes.  
6  
7  
8

### 9 **Objectives of the overall project**

11 The superordinate aim of this interdisciplinary RU is to identify risk factors and mechanisms  
12 for the persistence of somatic symptoms across diseases, and thereby create a basis for  
13 evidence-based interventions for patients suffering from PSS.  
14  
15  
16  
17  
18

19  
20 The research objectives of SOMACROSS are:

- 21  
22 a. to identify generic (i.e., disease-overarching) biological, psychological, and social  
23 mechanisms contributing to the persistence of somatic symptoms across a range of  
24 medical diseases and syndromes;  
25  
26 b. to identify disease-specific mechanisms contributing to the persistence of somatic  
27 symptoms;  
28  
29 c. to formulate new, empirically testable hypotheses about the interaction of generic and  
30 disease-specific factors and to integrate the derived risk factors and mechanisms into  
31 comprehensive prediction models for PSS;  
32  
33 d. to derive generic and disease-specific clinically useful risk factors for symptom  
34 persistence;  
35  
36 e. to identify modifiable risk factors and mechanisms in the transition from acute to chronic  
37 symptoms; and,  
38  
39 f. to test whether the therapeutic optimisation of modifiable risk factors (e.g., dysfunctional  
40 symptom expectations) improves clinical outcomes.  
41  
42  
43  
44  
45  
46  
47  
48  
49  
50  
51  
52  
53

54 The structural objectives of SOMACROSS are:

- 55 a. to raise awareness for a highly relevant research field across medical disciplines;  
56  
57 b. to disseminate knowledge regarding the development and treatment of PSS;  
58  
59 c. to build a strong interdisciplinary research structure focused on PSS; and,  
60



1  
2  
3 d. to establish qualifications of the next generation of scientific experts in this field.  
4  
5  
6

### 7 **Working hypotheses of the overall project**

9 Hypothesis 1: In all syndromes and diseases examined in SOMACROSS, biological,  
10 psychological and social factors contribute to the persistence of somatic symptoms individually  
11 or/and in interplay.  
12  
13

14  
15 Hypothesis 2: Persistence of somatic symptoms is predicted by common risk factors across  
16 syndromes and diseases.  
17  
18

19  
20 Hypothesis 3: Generic and syndrome- and/or disease-specific risk scores accurately predict  
21 the risk of persistence of somatic symptoms.  
22  
23

24  
25 Hypothesis 4: Expectations play a relevant role in the development of persistent somatic  
26 symptoms. Thus, the modification of dysfunctional expectations constitutes a promising  
27 starting point for interventions to improve symptom severity in PSS.  
28  
29  
30

## 31 32 33 **METHODS AND ANALYSIS**

### 34 **Design**

35  
36 Investigated symptoms and composition of SOMACROSS: To ensure clinical relevance,  
37 symptoms with high prevalence in medical settings were chosen, i.e., fatigue, gastrointestinal  
38 symptoms, pruritus, and multiple co-existing symptoms.<sup>75</sup> To detect patterns, similarities, and  
39 discrepancies in symptom persistence across a range of medical conditions, syndromes  
40 typically classified as somatic (e.g., primary biliary cholangitis, ulcerative colitis) and  
41 syndromes considered as 'functional' or 'somatoform' (e.g., irritable bowel syndrome,  
42 somatic symptom disorder) were included. The seven projects of SOMACROSS including  
43 content and project leaders are listed in **Table 1**  
44  
45  
46  
47  
48  
49  
50  
51  
52  
53  
54

55  
56  
57  
58 *Please insert **Table 1** approximately here*  
59  
60

1  
2  
3 Each project will investigate specific predisposing, triggering, maintaining or aggravating  
4 factors for PSS based on the current state of knowledge in the respective disease or  
5 syndrome. Based on our extensive literature review, we compiled a 'PSS working model'  
6  
7  
8  
9  
10  
11  
12  
13  
14  
15  
16  
17  
18  
19  
20  
21  
22  
23  
24  
25  
26  
27  
28  
29  
30  
31  
32  
33  
34  
35  
36  
37  
38  
39  
40  
41  
42  
43  
44  
45  
46  
47  
48  
49  
50  
51  
52  
53  
54  
55  
56  
57  
58  
59  
60

Each project will investigate specific predisposing, triggering, maintaining or aggravating factors for PSS based on the current state of knowledge in the respective disease or syndrome. Based on our extensive literature review, we compiled a 'PSS working model' (**Figure 2**), which serves as a starting point for rigorous testing of distinct factors with regard to their relevance for symptom persistence across all projects. These factors are assessed by the joint core set of measures (see below) that will be used across all projects. Other predictor variables, which are considered specific for defined diseases or syndromes only, will be tested in the respective individual projects. Of note, the classification of variables as predisposing, triggering, maintaining, and aggravating factors is preliminary and not always distinct.

*Please insert **Figure 2** approximately here*

Study designs and methodological approaches: The initial state of knowledge varies between the individual projects and health conditions. For some diseases, there is cross-sectional evidence on associations between symptom persistence and specific biopsychosocial variables. For others, longitudinal studies have identified relevant predictors for symptom maintenance. These different starting points in terms of current knowledge lead to different research aims (**Figure 3**). In an envisaged second funding phase, all projects will take a step towards modification of the relevant factors based on their individual project results.

*Please insert **Figure 3** approximately here*

Shared inclusion and exclusion criteria: All projects share common basic inclusion criteria, i.e.: age  $\geq 18$  years, sufficient oral and written German language proficiency, and written informed consent. Common exclusion criteria include: serious illness requiring immediate intervention; florid psychosis or substance abuse disorder, and acute suicidality. In addition

1  
2  
3 to these common criteria, the individual projects defined project-specific inclusion and  
4  
5 exclusion criteria.  
6  
7  
8

9 Shared assessment points: In order to compare results across projects, all projects (P) with  
10  
11 prospective study designs (P1-5) will use identical assessment points, i.e., baseline, 6-, and  
12  
13 12-month follow-up. These enable the statistical evaluation of generic predictors across  
14  
15 diseases and the pooling of data.  
16  
17

18  
19  
20 Patient and public involvement: Involvement of patients or members of the public varies  
21  
22 among the projects of the research unit and is therefore described in detail in the study  
23  
24 protocols of the individual projects.  
25  
26  
27

## 28 **Measures**

29  
30 Shared outcome measures: Severity of somatic symptoms is the primary outcome for all  
31  
32 projects (**Table 2**). Given that a) somatic symptom severity must be specifically assessed for  
33  
34 each symptom, and that b) generic instruments are needed to conduct comparisons and joint  
35  
36 evaluations across projects, somatic symptoms are measured in two ways:  
37  
38

- 39 a. Symptom-specific assessment, using specific measures of somatic symptom severity,
- 40  
41 b. Generic assessment of overall symptom severity, using the internationally well-  
42  
43 established Patient Health Questionnaire-15 (PHQ-15)<sup>76 77</sup> and the Numeric Rating Scale  
44  
45 for symptom intensity as recommended by the EURONET-SOMA group<sup>78</sup>.
- 46

47 Additional shared secondary outcomes include symptom interference, disability, and quality  
48  
49 of life.  
50  
51

52  
53 Joint psychosocial core instruments: The list of joint core instruments of SOMACROSS  
54  
55 (**Table 2**) reflects the factors displayed in the PSS working model (**Figure 2**). All joint core  
56  
57 instruments were chosen after considering construct relevance, reliability, validity, feasibility,  
58  
59 acceptability, availability in German and statistical constraints. In order to assess the  
60

1  
2  
3 comorbidity with DSM-5 somatic symptom disorder in all the diseases investigated, the  
4 relevant section of a German research version of the Structured Diagnostic Interview for  
5 Mental Disorders (SCID-5) will be conducted.<sup>79 80</sup>  
6  
7  
8  
9

10  
11 *Please insert **Table 2** approximately here*  
12  
13  
14

15 Joint biomedical factors: In addition to the joint core set of instruments, the various projects  
16 of SOMACROSS investigate further common variables with regard to their relevance for  
17 PSS. Disease overarching factors such as duration and subjective severity of disease, (prior  
18 biomedical disease and comorbidities, and side effects and subjective treatment experiences  
19 will be assessed as potential generic predictors of symptom persistence across all projects.  
20 Serum levels of C-reactive protein (CRP), interleukin 6 (IL-6) and tumour necrosis factor  
21 (TNF) will be measured at baseline as systemic biomarkers of central sensitization<sup>81</sup> to shed  
22 light on the controversial role of central sensitization in the persistence of somatic symptoms  
23 both prospectively and in a cross-sectional view across P1 to P5. The contribution of  
24 epigenetic mechanisms (altered DNA methylation in an epigenome-wide association study)  
25 in the course from acute to persistent symptoms in kidney disease will be analysed in P3.  
26 Additionally, epigenetic mechanisms will be analysed and cross-validated in pilot samples  
27 across P1 to P5 (n=20 patients per diagnosis, n=10 with low vs. high baseline symptom  
28 burden according to the PHQ-15), led by P3. We will also investigate the role of microbiome  
29 alterations for fatigue persistence among patients with primary biliary cholangitis and patients  
30 with primary sclerosing cholangitis (P1). In P2 and P3 we will collect stool samples from  
31 participants at baseline (P2 also post-intervention). Depending on the results regarding the  
32 course of PSS (P2 and P3) and the response to the intervention (P2), we will then analyse  
33 the microbiome (metagenomic sequencing). We believe that the above-mentioned  
34 biomedical factors are potentially relevant across several symptoms and diseases. Further  
35 disease-specific biomedical predictors such as disease stage and disease-specific markers  
36  
37  
38  
39  
40  
41  
42  
43  
44  
45  
46  
47  
48  
49  
50  
51  
52  
53  
54  
55  
56  
57  
58  
59  
60

1  
2  
3 of symptom persistence will be assessed within the individual projects, using appropriate  
4 methodology.  
5  
6  
7  
8

### 9 **Statistical evaluation**

10 Joint statistical evaluation strategy: The use of shared measures and assessment points  
11 across P1 to P6 enables collective statistical analyses (n=1,328 participants; *not* included are  
12 the n=2,432 participants from the cross-sectional analysis in P6 and the n=156 participants  
13 of the intervention groups in P2). The power calculations were performed individually for  
14 each project and are included in the projects' study protocols. The joint cross-project  
15 evaluation will allow us to develop an overarching conceptual model for the persistence of  
16 somatic symptoms. We will test paths and associations between the key factors of the  
17 working model by using an exploratory approach and initial hypotheses testing. Given  
18 scarcity of data on PSS for most of our included diseases and syndromes, we included a  
19 large number of variables in the first funding phase. This will enable us to generate new  
20 hypotheses for rigorous testing in the second funding phase. P1 and P3 will use multi-  
21 method approaches by embedding qualitative and experimental studies. Both approaches  
22 represent a valuable possibility for an in-depth exploration of mechanisms of symptom  
23 perception, development and maintenance. The statistical evaluation across projects will be  
24 carried out by biostatistics experts using a structural equation model approach. The statistical  
25 analyses will also lead to a reduction in predictors of symptom persistence by removing  
26 irrelevant pathways, which will allow more distinct analyses in subsequent studies.  
27  
28 Depending on the existing evidence for each condition, some of the projects follow a  
29 hypothesis-generating design while others perform confirmatory tests based on prior  
30 research (see also **Figure 3**). In exploratory analyses, we do not adjust for multiple testing in  
31 order to avoid the loss of power. However, we formulated testable, pre-specified initial  
32 hypotheses for each project as starting points, which contribute to the overarching  
33 hypotheses of the Z-Project. Statistical methods to adjust for multiple testing will be applied  
34 for the confirmatory analyses.  
35  
36  
37  
38  
39  
40  
41  
42  
43  
44  
45  
46  
47  
48  
49  
50  
51  
52  
53  
54  
55  
56  
57  
58  
59  
60

## ETHICS AND DISSEMINATION

Ethical approval: All studies including patients (P1 to P6) were approved by the respective Ethics Committees of the Medical Associations Hamburg and Westphalia-Lippe / Westphalian Wilhelms University, Münster, Germany. The individual studies will be conducted in accordance with the WMA Declaration of Helsinki, guidelines for Good Clinical Practice, national and local laws. Eligible patients will be informed about the study verbally and in written form before providing written informed consent.

Data sharing: De-identified individual patient data will be made publicly available. The times and the conditions of the availability of data will be in accordance with the 'Recommendations for Sharing Clinical Trial Data' of the Institute of Medicine (IOM). Data sharing will follow the *FAIR* Data Principles (Findable, Accessible, Interoperable and Reusable) and international naming conventions (e.g., Systematized Nomenclature of Medicine) to maximize transparency and scientific reproducibility. The main findings of each project will be published in peer-reviewed journals and made publicly available. In addition, we will communicate scientific results in lay language via press releases, social media, and patient forums.

Impact and relevance: Regarding the impact on the research field of PSS, SOMACROSS will provide the urgently needed infrastructure to facilitate collaboration and knowledge exchange between medical disciplines. The research field of PSS will benefit from the measurement of larger sets of predisposing, triggering, and maintaining biopsychosocial variables, and from additional theoretical work on their interrelation. By providing information to the public, e.g., at a 'patient day' and the SOMACROSS webpage, we hope to improve the understanding of PSS, avoid unnecessary and potentially harming medical procedures and provide reliable information for patients' personalised decision-making. Greater awareness and

1  
2  
3 understanding of PSS in society might also lead to reduced stigma associated with PSS.  
4  
5 SOMACROSS aims to open science to young researchers with innovative ideas, provide  
6  
7 researchers with flexible career opportunities, and improve the way in which research is  
8  
9 conducted. The most important measures of SOMACROSS are summarized in **Figure 4**.

10  
11  
12  
13  
14 *Please insert **Figure 4** approximately here*  
15  
16

## 17 **Conclusion**

18  
19  
20 Our patient-centred focus on subjectively distressing somatic symptoms has the potential to  
21  
22 enable increased visibility of somatic symptom burden across different medical specialties.  
23  
24 SOMACROSS will enhance the relevance of each individual project by integrating knowledge  
25  
26 about individual risk factors and mechanisms of PSS into joint analyses and publications.  
27  
28 While we also anticipate challenges regarding comparability, transferability, and complexity  
29  
30 of such a translational approach, we expect to gain insights on PSS that could not be  
31  
32 reached without this collaboration. Our results will inform the development of mechanism-  
33  
34 based tailored interventions, and in the long term, SOMACROSS will enable the translation  
35  
36 of cutting-edge scientific knowledge into clinical practice by providing clinicians with  
37  
38 evidence-based prevention and treatment options.  
39  
40  
41  
42  
43  
44  
45  
46  
47  
48  
49  
50  
51  
52  
53  
54  
55  
56  
57  
58  
59  
60

## Acknowledgements

We would like to thank Professor Dr. Paul Enck, PhD, University Hospital, Tübingen, Germany, Professor Dr. Peter Henningsen, MD, Technical University Hospital, Munich, Germany, Professor Dr. Uwe Koch-Gromus, MD, PhD, University Medical Centre Hamburg-Eppendorf, Germany, and Professor Dr. Judith Rosmalen, PhD, University Medical Centre Groningen, the Netherlands for their continuous and extremely helpful support during the application process for the SOMACROSS research unit. We are also very grateful to Professor Simone Kühn, PhD and Professor Jürgen Gallinat, MD, University Medical Centre Hamburg-Eppendorf, Germany, for their valuable contributions to previous versions of the SOMACROSS research proposal. Finally, we would like to thank Dr. Kerstin Maehder, PhD, for her critical review of this study protocol.

## Author contributions

BL is the speaker of the SOMACROSS research unit. OvB is a Mercator Fellow of this research unit, all other authors lead the individual SOMACROSS projects. AZ and EV provide statistical expertise to all projects of the research unit. BL drafted the first version of the study protocol, MSM and AT contributed individual parts of the study protocol. All authors contributed to the refinement of the study protocol, read and approved the final version.

## Funding:

The Research Unit 5211 (RU 5211) »*Persistent SOMAtic Symptoms ACROSS Diseases: From Risk Factors to Modification (SOMACROSS)*«, is funded by the German Research Foundation (Deutsche Forschungsgemeinschaft, DFG). The DFG project number for the coordination project is 445297796 (speaker: Professor Bernd Löwe, MD); see also <https://gepris.dfg.de/gepris/projekt/445297796>. The funding source had no role in the design of this study and will not have any role during its execution, analyses, interpretation of the data, or decision to submit results.



1  
2  
3 **Competing interests**  
4

5 None  
6  
7  
8  
9  
10  
11  
12  
13  
14  
15  
16  
17  
18  
19  
20  
21  
22  
23  
24  
25  
26  
27  
28  
29  
30  
31  
32  
33  
34  
35  
36  
37  
38  
39  
40  
41  
42  
43  
44  
45  
46  
47  
48  
49  
50  
51  
52  
53  
54  
55  
56  
57  
58  
59  
60

For peer review only

## REFERENCES

1. Kohlmann S, Gierk B, Hummelgen M, et al. Somatic symptoms in patients with coronary heart disease: prevalence, risk factors, and quality of life. *JAMA Intern Med* 2013;173:1469-71.
2. Löwe B, Spitzer RL, Williams JB, et al. Depression, anxiety and somatization in primary care: syndrome overlap and functional impairment. *Gen Hosp Psychiatry* 2008;30:191-99.
3. Henningsen P, Gündel H, Kop WJ, et al. Persistent Physical Symptoms as Perceptual Dysregulation: A Neuropsychobehavioral Model and Its Clinical Implications. *Psychosom Med* 2018;80:422-31.
4. Klaus K, Rief W, Brähler E, et al. The distinction between "medically unexplained" and "medically explained" in the context of somatoform disorders. *Int J Behav Med* 2013;20:161-71.
5. Joustra ML, Janssens KA, Bultmann U, et al. Functional limitations in functional somatic syndromes and well-defined medical diseases. Results from the general population cohort LifeLines. *J Psychosom Res* 2015;79:94-9.
6. Kohlmann S, Gierk B, Murray AM, et al. Base Rates of Depressive Symptoms in Patients with Coronary Heart Disease: An Individual Symptom Analysis. *PLoS One* 2016;11:e0156167.
7. Kroenke K, Zhong X, Theobald D, et al. Somatic symptoms in patients with cancer experiencing pain or depression: prevalence, disability, and health care use. *Arch Intern Med* 2010;170:1686-94.
8. Kroenke K. A practical and evidence-based approach to common symptoms: a narrative review. *Ann Intern Med* 2014;161:579-86.
9. World Health Organization (WHO). International Classification of Disease, ICD-11 2020 [Available from: <https://icd.who.int/en2019>].
10. Hinz A, Ernst J, Glaesmer H, et al. Frequency of somatic symptoms in the general population: Normative values for the Patient Health Questionnaire-15 (PHQ-15). *J Psychosom Res* 2017;96:27-31.
11. Kroenke K. Patients presenting with somatic complaints: epidemiology, psychiatric comorbidity and management. *Int J Methods Psychiatr Res* 2003;12:34-43.
12. Acevedo-Mesa A, Tendeiro JN, Roest A, et al. Improving the Measurement of Functional Somatic Symptoms With Item Response Theory. *Assessment* 2020:1073191120947153.
13. Steinbrecher N, Koerber S, Frieser D, et al. The prevalence of medically unexplained symptoms in primary care. *Psychosomatics* 2011;52:263-71.

- 1
- 2
- 3 14. Schappert SM, Rechtsteiner EA. Ambulatory medical care utilization estimates for 2007. *Vital and*
- 4 *health statistics Series 13, Data from the National Health Survey 2011*:1-38.
- 5
- 6
- 7 15. Wiborg JF, Gieseler D, Fabisch AB, et al. Suicidality in primary care patients with somatoform
- 8 disorders. *Psychosom Med* 2013;75:800-06.
- 9
- 10 16. Jordan P, Shedden-Mora MC, Löwe B. Predicting suicidal ideation in primary care: An approach to
- 11 identify easily assessable key variables. *Gen Hosp Psychiatry* 2018;51:106-11.
- 12
- 13 17. Konnopka A, Kaufmann C, König HH, et al. Association of costs with somatic symptom severity in
- 14 patients with medically unexplained symptoms. *J Psychosom Res* 2013;75:370-5.
- 15
- 16 18. Wortman MSH, Lokkerbol J, van der Wouden JC, et al. Cost-effectiveness of interventions for
- 17 medically unexplained symptoms: A systematic review. *PLoS One* 2018;13:e0205278.
- 18
- 19 19. Henningsen P, Zipfel S, Sattel H, et al. Management of Functional Somatic Syndromes and Bodily
- 20 Distress. *Psychother Psychosom* 2018;87:12-31.
- 21
- 22 20. Aaron LA, Buchwald D. A review of the evidence for overlap among unexplained clinical
- 23 conditions. *Ann Intern Med* 2001;134:868-81.
- 24
- 25 21. Burton C, Fink P, Henningsen P, et al. Functional somatic disorders: discussion paper for a new
- 26 common classification for research and clinical use. *BMC medicine* 2020;18:34-34.
- 27
- 28 22. American Psychiatric Association (APA). Diagnostic and Statistical Manual of Mental Disorders,
- 29 4th ed. (DSM-IV). Washington DC: American Psychiatric Association 1994.
- 30
- 31 23. Dilling H, Mombour W, Schmidt M. Weltgesundheitsorganisation: Internationale Klassifikation
- 32 psychischer Störungen. ICD-10 Kapitel V (F). Klinisch-diagnostische Leitlinien. 3. Auflage. Bern,
- 33 Swiss: Huber 1999.
- 34
- 35 24. Picariello F, Ali S, Moss-Morris R, et al. The most popular terms for medically unexplained
- 36 symptoms: the views of CFS patients. *J Psychosom Res* 2015;78:420-6.
- 37
- 38 25. Marks EM, Hunter MS. Medically Unexplained Symptoms: an acceptable term? *British journal of*
- 39 *pain* 2015;9:109-14.
- 40
- 41 26. American Psychiatric Association (APA). Diagnostic and Statistical Manual of Mental Disorders,
- 42 Fifth Edition (DSM-5). Arlington, VA: American Psychiatric Association 2013.
- 43
- 44 27. Dimsdale JE, Creed F, Escobar J, et al. Somatic symptom disorder: an important change in DSM.
- 45 *J Psychosom Res* 2013;75:223-8.
- 46
- 47 28. Juergens MC, Seekatz B, Moosdorf RG, et al. Illness beliefs before cardiac surgery predict
- 48 disability, quality of life, and depression 3 months later. *J Psychosom Res* 2010;68:553-60.
- 49
- 50
- 51
- 52
- 53
- 54
- 55
- 56
- 57
- 58
- 59
- 60

- 1
- 2
- 3 29. Nestoriuc Y, von Blanckenburg P, Schuricht F, et al. Is it best to expect the worst? Influence of
- 4 patients' side-effect expectations on endocrine treatment outcome in a 2-year prospective clinical
- 5 cohort study. *Ann Oncol* 2016;27:1909-15.
- 6
- 7
- 8
- 9 30. Löwe B, Lohse A, Andresen V, et al. The Development of Irritable Bowel Syndrome: A Prospective
- 10 Community-Based Cohort Study. *Am J Gastroenterol* 2016;111:1320-9.
- 11
- 12
- 13 31. Rief W, Shedden-Mora MC, Laferton JA, et al. Preoperative optimization of patient expectations
- 14 improves long-term outcome in heart surgery patients: results of the randomized controlled PSY-
- 15 HEART trial. *BMC Medicine* 2017;15:4.
- 16
- 17
- 18 32. Brown SA, Tyrer FC, Clarke AL, et al. Symptom burden in patients with chronic kidney disease not
- 19 requiring renal replacement therapy. *Clinical Kidney Journal* 2017;10:788-96.
- 20
- 21
- 22 33. Almutary H, Bonner A, Douglas C. Symptom burden in chronic kidney disease: a review of recent
- 23 literature. *Journal of renal care* 2013;39:140-50.
- 24
- 25
- 26 34. Griffiths L, Jones DE. Pathogenesis of primary biliary cirrhosis and its fatigue. *Dig Dis*
- 27 2014;32:615-25.
- 28
- 29
- 30 35. Kumar S, Joshi R, Joge V. Do clinical symptoms and signs predict reduced renal function among
- 31 hospitalized adults? *Annals of medical and health sciences research* 2013;3:492-7.
- 32
- 33
- 34 36. Chalder T, Patel M, James K, et al. Persistent physical symptoms reduction intervention: a system
- 35 change and evaluation in secondary care (PRINCE secondary) - a CBT-based transdiagnostic
- 36 approach: study protocol for a randomised controlled trial. *BMC Psychiatry* 2019;19:307.
- 37
- 38
- 39 37. Ballering AV, Bonvanie IJ, Olde Hartman TC, et al. Gender and sex independently associate with
- 40 common somatic symptoms and lifetime prevalence of chronic disease. *Soc Sci Med*
- 41 2020;253:112968.
- 42
- 43
- 44
- 45 38. Borsook D, Youssef AM, Simons L, et al. When pain gets stuck: the evolution of pain chronification
- 46 and treatment resistance. *Pain* 2018;159:2421-36.
- 47
- 48
- 49 39. Kirmayer LJ, Sartorius N. Cultural models and somatic syndromes. *Psychosom Med* 2007;69:832-
- 50 40.
- 51
- 52
- 53 40. Afari N, Ahumada SM, Wright LJ, et al. Psychological trauma and functional somatic syndromes: a
- 54 systematic review and meta-analysis. *Psychosom Med* 2014;76:2-11.
- 55
- 56
- 57 41. Karatzias T, Howard R, Power K, et al. Organic vs. functional neurological disorders: The role of
- 58 childhood psychological trauma. *Child Abuse Negl* 2017;63:1-6.
- 59
- 60

- 1  
2  
3 42. Borsini A, Heggul N, Mondelli V, et al. Childhood stressors in the development of fatigue  
4 syndromes: a review of the past 20 years of research. *Psychol Med* 2014;44:1809-23.  
5  
6  
7 43. Herzog JI, Schmahl C. Adverse Childhood Experiences and the Consequences on  
8 Neurobiological, Psychosocial, and Somatic Conditions Across the Lifespan. *Front Psychiat*  
9 2018;9:420.  
10  
11  
12 44. Claassen-van Dessel N, van der Wouden JC, Hoekstra T, et al. The 2-year course of Medically  
13 Unexplained Physical Symptoms (MUPS) in terms of symptom severity and functional status:  
14 results of the PROSPECTS cohort study. *J Psychosom Res* 2018;104:76-87.  
15  
16  
17 45. Gillespie NA, Zhu G, Heath AC, et al. The genetic aetiology of somatic distress. *Psychol Med*  
18 2000;30:1051-61.  
19  
20  
21 46. Rief W, Martin A. How to use the new DSM-5 somatic symptom disorder diagnosis in research and  
22 practice: a critical evaluation and a proposal for modifications. *Annu Rev Clin Psychol*  
23 2014;10:339-67.  
24  
25  
26 47. Deary V, Chalder T, Sharpe M. The cognitive behavioural model of medically unexplained  
27 symptoms: a theoretical and empirical review. *Clin Psychol Rev* 2007;27:781-97.  
28  
29  
30 48. Rief W, Barsky AJ. Psychobiological perspectives on somatoform disorders.  
31 *Psychoneuroendocrinology* 2005;30:996-1002.  
32  
33  
34 49. Brown RJ. Psychological mechanisms of medically unexplained symptoms: an integrative  
35 conceptual model. *Psychol Bull* 2004;130:793-812.  
36  
37  
38 50. Rief W, Broadbent E. Explaining medically unexplained symptoms-models and mechanisms. *Clin*  
39 *Psychol Rev* 2007;27:821-41.  
40  
41  
42 51. Barsky AJ, Wyshak G. Hypochondriasis and somatosensory amplification. *Br J Psychiatry*  
43 1990;157:404-9.  
44  
45  
46 52. Boersma K, Linton SJ. How does persistent pain develop? An analysis of the relationship between  
47 psychological variables, pain and function across stages of chronicity. *Behav Res Ther*  
48 2005;43:1495-507.  
49  
50  
51 53. De Gucht V, Heiser W. Alexithymia and somatisation: quantitative review of the literature. *J*  
52 *Psychosom Res* 2003;54:425-34.  
53  
54  
55 54. Picavet HS, Vlaeyen JW, Schouten JS. Pain catastrophizing and kinesiophobia: predictors of  
56 chronic low back pain. *Am J Epidemiol* 2002;156:1028-34.  
57  
58  
59 55. Vlaeyen JW, Crombez G, Linton SJ. The fear-avoidance model of pain. *Pain* 2016;157:1588-9.  
60

- 1  
2  
3 56. Boersma K, Linton S, Overmeer T, et al. Lowering fear-avoidance and enhancing function through  
4 exposure in vivo. A multiple baseline study across six patients with back pain. *Pain* 2004;108:8-  
5 16.  
6  
7  
8  
9 57. Löwe B, Gerloff C. Functional Somatic Symptoms Across Cultures: Perceptual and Health Care  
10 Issues. *Psychosom Med* 2018;80:412-15.  
11  
12 58. Peters EM. Stressed skin?--a molecular psychosomatic update on stress-causes and effects in  
13 dermatologic diseases. *Journal der Deutschen Dermatologischen Gesellschaft = Journal of the*  
14 *German Society of Dermatology: JDDG* 2016;14:233-52; quiz 53.  
15  
16  
17  
18 59. van Ravenzwaaij J, Olde Hartman T, van Ravesteijn H, et al. Explanatory models of medically  
19 unexplained symptoms: a qualitative analysis of the literature. *Mental health in family medicine*  
20 2010;7:223-31.  
21  
22  
23  
24 60. Barsky AJ, Saintfort R, Rogers MP, et al. Nonspecific medication side effects and the nocebo  
25 phenomenon. *JAMA* 2002;287:622-7.  
26  
27  
28 61. Heim C, Ehlert U, Hellhammer DH. The potential role of hypocortisolism in the pathophysiology of  
29 stress-related bodily disorders. *Psychoneuroendocrinology* 2000;25:1-35.  
30  
31  
32 62. Bjurstrom MF, Giron SE, Griffis CA. Cerebrospinal Fluid Cytokines and Neurotrophic Factors in  
33 Human Chronic Pain Populations: A Comprehensive Review. *Pain practice: the official journal of*  
34 *World Institute of Pain* 2016;16:183-203.  
35  
36  
37 63. van den Broeke EN. Central sensitization and pain hypersensitivity: Some critical considerations.  
38 *F1000Research* 2018;7:1325.  
39  
40  
41 64. Nagy-Szakal D, Williams BL, Mishra N, et al. Fecal metagenomic profiles in subgroups of patients  
42 with myalgic encephalomyelitis/chronic fatigue syndrome. *Microbiome* 2017;5:44.  
43  
44  
45 65. Minerbi A, Gonzalez E, Brereton NJB, et al. Altered microbiome composition in individuals with  
46 fibromyalgia. *Pain* 2019;160:2589-602.  
47  
48  
49 66. Laferton JA, Kube T, Salzmann S, et al. Patients' Expectations Regarding Medical Treatment: A  
50 Critical Review of Concepts and Their Assessment. *Front Psychol* 2017;8:233.  
51  
52  
53 67. Petrie KJ, Rief W. Psychobiological Mechanisms of Placebo and Nocebo Effects: Pathways to  
54 Improve Treatments and Reduce Side Effects. *Annual review of psychology* 2019;70:599-625.  
55  
56  
57 68. Enck P, Bingel U, Schedlowski M, et al. The placebo response in medicine: minimize, maximize or  
58 personalize? *Nature Reviews Drug discovery* 2013;12:191-204.  
59  
60

- 1  
2  
3 69. Vase L, Vollert J, Finnerup NB, et al. Predictors of the placebo analgesia response in randomized  
4 controlled trials of chronic pain: a meta-analysis of the individual data from nine industrially  
5 sponsored trials. *Pain* 2015;156:1795-802.  
6  
7  
8 70. Goffaux P, de Souza JB, Potvin S, et al. Pain relief through expectation supersedes descending  
9 inhibitory deficits in fibromyalgia patients. *Pain* 2009;145:18-23.  
10  
11 71. Nestoriuc Y, Orav EJ, Liang MH, et al. Prediction of nonspecific side effects in rheumatoid arthritis  
12 patients by beliefs about medicines. *Arthritis Care & Research* 2010;62:791-9.  
13  
14 72. Schmitz J, Müller M, Stork J, et al. Positive Treatment Expectancies Reduce Clinical Pain and  
15 Perceived Limitations in Movement Ability Despite Increased Experimental Pain: A Randomized  
16 Controlled Trial on Sham Opioid Infusion in Patients with Chronic Back Pain. *Psychother  
17 Psychosom* 2019;88:203-14.  
18  
19 73. Kube T, Glombiewski JA, Rief W. Using different expectation mechanisms to optimize treatment of  
20 patients with medical conditions: A systematic review. *Psychosom Med* 2018;80:535-43.  
21  
22 74. Ongaro G, Kaptchuk TJ. Symptom perception, placebo effects, and the Bayesian brain. *Pain*  
23 2019;160:1-4.  
24  
25 75. Laux G, Rosemann T, Korner T, et al. Detailed data collection regarding the utilization of medical  
26 services, morbidity, course of illness and outcomes by episode-based documentation in general  
27 practices within the CONTENT project. *Gesundheitswesen* 2007;69:284-91.  
28  
29 76. Kroenke K, Spitzer RL, Williams JB. The PHQ-15: Validity of a new measure for evaluating the  
30 severity of somatic symptoms. *Psychosom Med* 2002;64:258-66.  
31  
32 77. Kroenke K, Spitzer RL, Williams JB, et al. The Patient Health Questionnaire somatic, anxiety, and  
33 depressive symptom scales: a systematic review. *Gen Hosp Psychiatry* 2010;32:345-59.  
34  
35 78. Rief W, Burton C, Frosthalm L, et al. Core Outcome Domains for Clinical Trials on Somatic  
36 Symptom Disorder, Bodily Distress Disorder, and Functional Somatic Syndromes: European  
37 Network on Somatic Symptom Disorders Recommendations. *Psychosom Med* 2017;79:1008-15.  
38  
39 79. Toussaint A, Hüsing P, Kohlmann S, et al. Detecting DSM-5 somatic symptom disorder: criterion  
40 validity of the Patient Health Questionnaire-15 (PHQ-15) and the Somatic Symptom Scale-8  
41 (SSS-8) in combination with the Somatic Symptom Disorder - B Criteria Scale (SSD-12). *Psychol  
42 Med* 2019:1-10.  
43  
44 80. Toussaint A, Murray AM, Voigt K, et al. Development and Validation of the Somatic Symptom  
45 Disorder-B Criteria Scale (SSD-12). *Psychosom Med* 2016;78:5-12.  
46  
47  
48  
49  
50  
51  
52  
53  
54  
55  
56  
57  
58  
59  
60

- 1  
2  
3 81. Ji RR, Nackley A, Huh Y, et al. Neuroinflammation and Central Sensitization in Chronic and  
4  
5 Widespread Pain. *Anesthesiol* 2018;129:343-66.  
6  
7  
8  
9  
10  
11  
12  
13  
14  
15  
16  
17  
18  
19  
20  
21  
22  
23  
24  
25  
26  
27  
28  
29  
30  
31  
32  
33  
34  
35  
36  
37  
38  
39  
40  
41  
42  
43  
44  
45  
46  
47  
48  
49  
50  
51  
52  
53  
54  
55  
56  
57  
58  
59  
60

For peer review only



**Table 1:** Individual projects and project leaders of the SOMACROSS research unit

| Project No.                                                                                    | Project title                                                                                                                  | Project content                                                                                                                                                                                                                                                               | Project leader(s)                     | Institution(s)                                                                                                |
|------------------------------------------------------------------------------------------------|--------------------------------------------------------------------------------------------------------------------------------|-------------------------------------------------------------------------------------------------------------------------------------------------------------------------------------------------------------------------------------------------------------------------------|---------------------------------------|---------------------------------------------------------------------------------------------------------------|
|  P1           | Fatigue in Primary Biliary Cholangitis: Factors Associated With Severity and Persistence as Future Therapeutic Targets         | P1 examines the disease-specific biological and generic psychosocial factors which contribute to fatigue in patients with primary biliary cholangitis and primary sclerosing cholangitis and aims to determine its course over time.                                          | Dr. Anne Toussaint, PhD               | Department of Psychosomatic Medicine and Psychotherapy, UKE                                                   |
|                                                                                                |                                                                                                                                |                                                                                                                                                                                                                                                                               | Prof. Dr. Christoph Schramm, MD       | Martin Zeitz Centre for Rare Diseases and I. Department of Medicine, UKE                                      |
|  P2*          | Persistence of Gastrointestinal Symptoms in Irritable Bowel Syndrome and Ulcerative Colitis: From Risk Factors to Modification | P2 investigates whether somatic symptoms in patients with irritable bowel syndrome and ulcerative colitis are influenced by illness anxiety and symptom expectations and could therefore be improved by expectation management.                                               | Prof. Dr. Bernd Löwe, MD              | Department of Psychosomatic Medicine and Psychotherapy, UKE                                                   |
|                                                                                                |                                                                                                                                |                                                                                                                                                                                                                                                                               | Prof. Dr. Ansgar W. Lohse, MD         | I. Department of Medicine, UKE                                                                                |
|  P3           | Predictors of Somatic Symptom Persistence in Patients With Chronic Kidney Disease                                              | P3 aims to identify multivariate predictors of PSS in patients with pre-dialysis chronic kidney disease (CKD) by testing biomedical, psychological, and treatment-related predictors using a mixed methods cohort study.                                                      | Prof. Dr. Meike Shedden Mora, PhD     | Department of Psychosomatic Medicine and Psychotherapy, UKE, Department of Psychology, Medical School Hamburg |
|                                                                                                |                                                                                                                                |                                                                                                                                                                                                                                                                               | Prof. Dr. Tobias B. Huber, MD         | III. Department of Medicine, UKE                                                                              |
|  P4           | Biological and Psychosocial Factors Affecting the Persistence of Pruritus Symptoms                                             | P4 examines the interplay of psychosocial and biological factors affecting the maintenance of pruritus in patients with atopic dermatitis, patients with pruritus on non-lesional skin, and healthy controls.                                                                 | Prof. Dr. Stefan W. Schneider, MD     | Department of Dermatology and Venerology, UKE                                                                 |
|                                                                                                |                                                                                                                                |                                                                                                                                                                                                                                                                               | Prof. Dr. Dr. Sonja Ständer, MD       | Department of Dermatology, University of Münster                                                              |
|                                                                                                |                                                                                                                                |                                                                                                                                                                                                                                                                               | Prof. Dr. Gudrun Schneider, ND        | Department of Psychosomatic Medicine and Psychotherapy, University of Münster                                 |
|  P5*         | Modifiable Factors for Somatic Symptom Persistence in Patients With Somatic Symptom Disorder                                   | P5 examines whether expectations about symptom severity and coping with symptoms determine symptom persistence in patients with somatic symptom disorder in interaction with somatic comorbidity and psychosocial factors.                                                    | Prof. Dr. Yvonne Nestoriuc, PhD       | Department of Clinical Psychology, Helmut-Schmidt University, Hamburg                                         |
|                                                                                                |                                                                                                                                |                                                                                                                                                                                                                                                                               | Dr. Anne Toussaint, PhD               | Department of Psychosomatic Medicine and Psychotherapy, UKE                                                   |
|  P6         | Social Inequalities in Aggravating Factors of Persistent Somatic Symptoms                                                      | P6 examines whether socioeconomic and migration status are associated with risk factors for the persistence of irritable bowel syndrome and fatigue.                                                                                                                          | Prof. Dr. Olaf von dem Knesebeck, PhD | Institute of Medical Sociology, UKE                                                                           |
|  Z-Project* | Generic and Disease-Specific Mechanisms of Somatic Symptom Persistence Across Diseases                                         | The Z-Project will oversee the other projects with respect to adherence to the common methodology. The Z-Project will pool data from the individual projects to identify networks of interacting symptoms and mechanisms of symptom persistence across projects and diseases. | Prof. Dr. Antonia Zapf, PhD           | Department of Medical Biometry and Epidemiology, UKE                                                          |

\* Co-applicants: **P2:** PD Dr. Viola Andresen, MD; Prof Dr. Yvonne Nestoriuc, PhD; **P6** and **Z-Project:** Prof. Dr. Bernd Löwe, MD; UKE = Universitätsklinikum Hamburg-Eppendorf (University Medical Centre Hamburg-Eppendorf, Hamburg, Germany)

**Table 2:** Risk factors, mechanisms, and outcomes investigated by the SOMACROSS research unit

| Risk factors and mechanisms (assessed via self-report / laboratory test)   |                                                                                                                                                                             |                                                                                    |            |        |   |    |
|----------------------------------------------------------------------------|-----------------------------------------------------------------------------------------------------------------------------------------------------------------------------|------------------------------------------------------------------------------------|------------|--------|---|----|
| Predisposing, triggering and maintaining /aggravating factors              | Single constructs                                                                                                                                                           | Instrument                                                                         | Items      | Months |   |    |
|                                                                            |                                                                                                                                                                             |                                                                                    |            | 0      | 6 | 12 |
| <b>Sociodemographic factors</b>                                            | Gender, age, nationality, heights, weights, marital status, migration status, current housing situation, insurance, education, occupational status, health care utilization | Single items                                                                       | 19         | X      | X | X  |
| <b>Psychosocial factors</b>                                                | Adverse childhood experiences                                                                                                                                               | Adverse Childhood Experiences Questionnaire (ACE-D)                                | 10         | X      |   |    |
|                                                                            | Personality: neuroticism                                                                                                                                                    | Big Five Inventory -10 (BFI-10)                                                    | 10         | X      |   |    |
|                                                                            | Negative affectivity                                                                                                                                                        | Positive and Negative Affectivity Schedule (PANAS) Perceived Stress Scale (PSS-10) | 20         | X      |   |    |
|                                                                            | Life stressors                                                                                                                                                              | Perceived stigmatization                                                           | 10         | X      |   |    |
| <b>Cognitive-perceptual and emotional mechanisms</b>                       | Somatosensory amplification                                                                                                                                                 | Somatosensory Amplification Scale (SSAS)                                           | 10         | X      | X | X  |
|                                                                            | Catastrophizing                                                                                                                                                             | Coping Strategies Questionnaire - Catastrophizing Subscale (CSQ-CAT)               | 6          | X      | X | X  |
|                                                                            | Treatment expectations                                                                                                                                                      | Treatment Expectation Questionnaire (TEX-Q)                                        | 15         | X      | X | X  |
|                                                                            | Expectation of symptom severity                                                                                                                                             | Numeric Rating Scale                                                               | 1          | X      | X | X  |
|                                                                            | Expectation of symptom burden                                                                                                                                               | Numeric Rating Scale                                                               | 1          | X      | X | X  |
|                                                                            | Expectation of coping with symptoms                                                                                                                                         | Numeric Rating Scale                                                               | 1          | X      | X | X  |
|                                                                            | Psychological burden related to somatic symptoms or associated health concerns                                                                                              | Somatic Symptom Disorder – B Criteria Scale (SSD-12)                               | 12         | X      | X | X  |
|                                                                            | Illness-related worries                                                                                                                                                     | Whiteley-Index Short Version (WI-7)                                                | 7          | X      | X | X  |
|                                                                            | Symptom perception                                                                                                                                                          | Illness perception questionnaire (B-IPQ)                                           | 8          | X      | X | X  |
|                                                                            | Anxiety                                                                                                                                                                     | Generalized Anxiety Disorder-7 (GAD-7)                                             | 7          | X      | X | X  |
|                                                                            | Depression                                                                                                                                                                  | Patient Health Questionnaire-9 (PHQ-9)                                             | 9          | X      | X | X  |
|                                                                            | Alexithymia                                                                                                                                                                 | Toronto Alexithymia Scale (TAS-20)                                                 | 20         | X      |   |    |
| Emotion regulation                                                         | Emotion Regulation Questionnaire (ERQ)                                                                                                                                      | 10                                                                                 | X          |        |   |    |
| <b>Behavioral factors</b>                                                  | Physical inactivity                                                                                                                                                         | International Physical Activity Questionnaire (IPAQ-SF)                            | 7          | X      | X | X  |
| <b>Biomedical and treatment-related factors</b>                            | (Prior) organic disease / comorbidity                                                                                                                                       | Self-Administered Comorbidity Questionnaire (SCQ)                                  | 16         | X      |   |    |
|                                                                            | Medication adherence                                                                                                                                                        | Medication Adherence Report Scale (MARS-D)                                         | 5          | X      |   |    |
|                                                                            | Side effects                                                                                                                                                                | Numeric Rating Scale                                                               | 1          | X      | X | X  |
|                                                                            | Treatment experiences                                                                                                                                                       | Numeric Rating Scale                                                               | 2          | X      | X | X  |
|                                                                            | Systemic inflammation, markers of central sensitization (P1 to P5)                                                                                                          | C-reactive protein (CRP)                                                           |            | X      |   |    |
|                                                                            |                                                                                                                                                                             | Interleukin 6 (IL-6)                                                               |            | X      |   |    |
|                                                                            |                                                                                                                                                                             | Tumor necrosis factor alpha (TNFα)                                                 |            | X      |   |    |
|                                                                            | Duration of disease                                                                                                                                                         | Single interview questions                                                         | 2          | X      |   |    |
| Medication                                                                 | Single interview question                                                                                                                                                   | 1                                                                                  | X          | X      | X |    |
| <b>Outcome variables (assessed via self-report / diagnostic interview)</b> |                                                                                                                                                                             |                                                                                    |            |        |   |    |
| <b>Primary outcome: somatic symptoms</b>                                   | Somatic symptom burden                                                                                                                                                      | Patient Health Questionnaire-15 (PHQ-15)                                           | 15         | X      | X | X  |
|                                                                            | Symptom intensity                                                                                                                                                           | EURONET-SOMA Numeric Rating Scale                                                  | 1          | X      | X | X  |
| <b>Secondary outcomes: functioning</b>                                     | Symptom interference                                                                                                                                                        | EURONET-SOMA Numeric Rating Scale                                                  | 1          | X      | X | X  |
|                                                                            | Symptom related disability                                                                                                                                                  | Pain Disability Index – adapted (PDI)                                              | 7          | X      | X | X  |
|                                                                            | Health-related quality of life                                                                                                                                              | Short Form Health Survey (SF-12)                                                   | 12         | X      | X | X  |
| <b>Diagnosis of somatic symptom disorder (DSM-5)</b>                       | Diagnostic classification                                                                                                                                                   | Structured Clinical Interview for the DSM-5 (SCID)                                 | 18         | X      |   | X  |
| <b>TOTAL (self-report items)</b>                                           |                                                                                                                                                                             |                                                                                    | <b>266</b> |        |   |    |

## FIGURE LEGENDS

**Figure 1.** Relevance of Persistent Somatic Symptoms

**Figure 2.** Working model of the SOMACROSS research unit: Risk factors and mechanisms for somatic symptom persistence as investigated by the individual projects (blue numbers indicate projects investigating the respective factors)

**Figure 3.** Projects 1-6 (P1-6): From current state of knowledge to aims of scientific insight

**Figure 4.** Steps forward through the SOMACROSS research unit

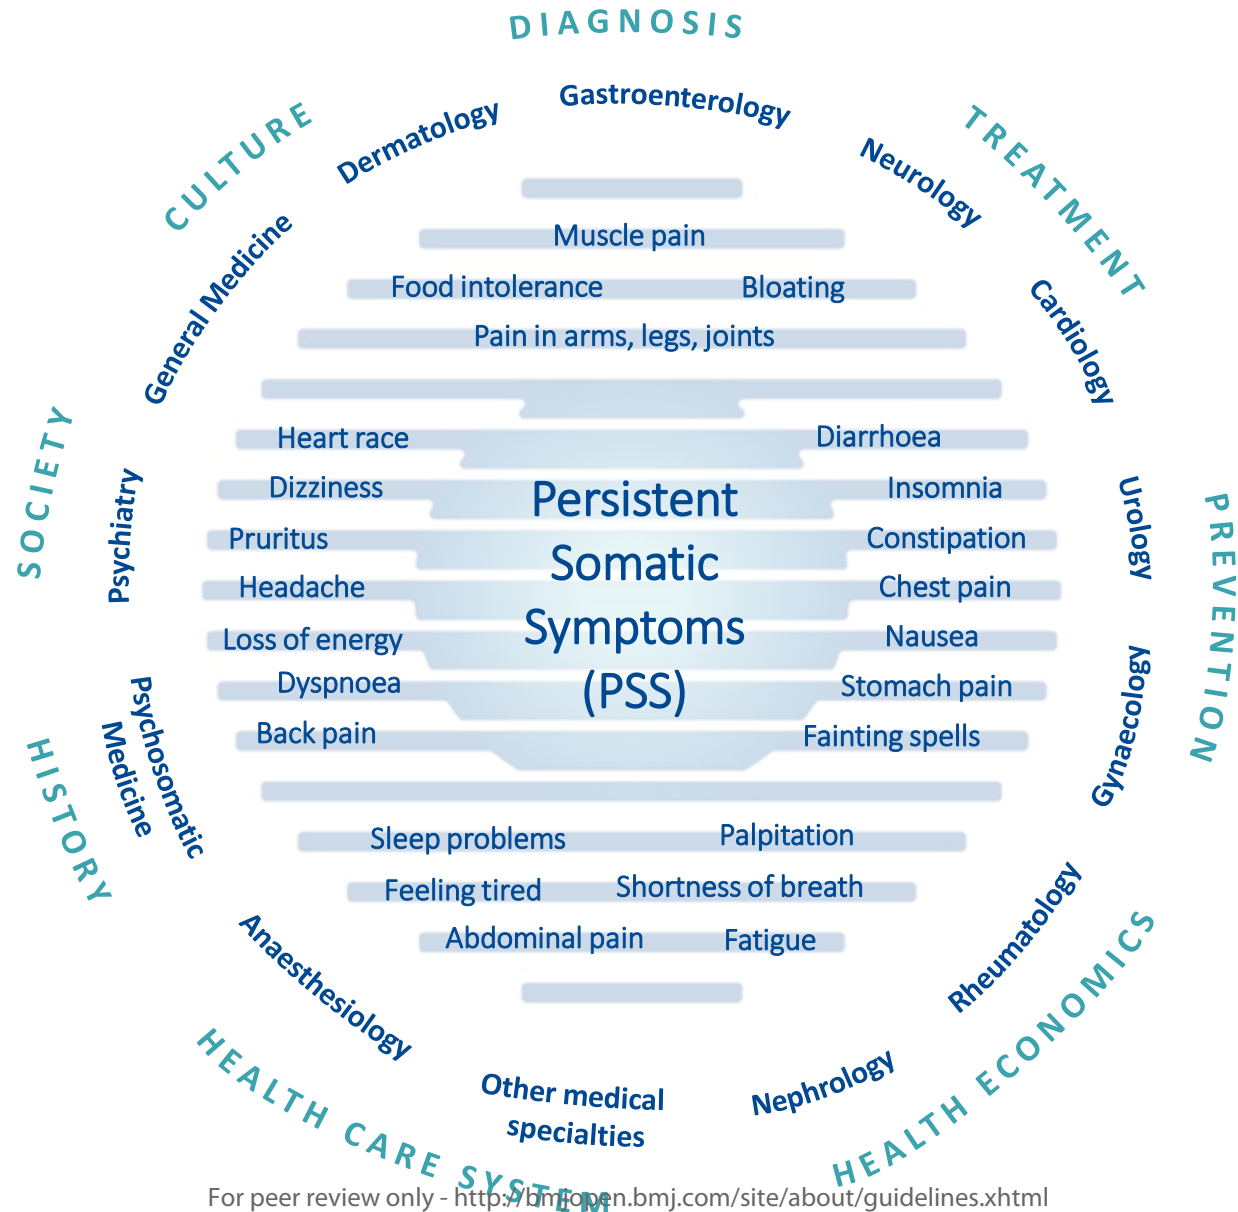

1  
2  
3  
4  
5  
6  
7  
8  
9  
10  
11  
12  
13  
14  
15  
16  
17  
18  
19  
20  
21  
22  
23  
24  
25  
26  
27  
28  
29  
30  
31  
32  
33  
34  
35  
36  
37  
38  
39  
40  
41

**PREDISPOSING FACTORS      TRIGGERING FACTORS      MAINTAINING / AGGRAVATING FACTORS**

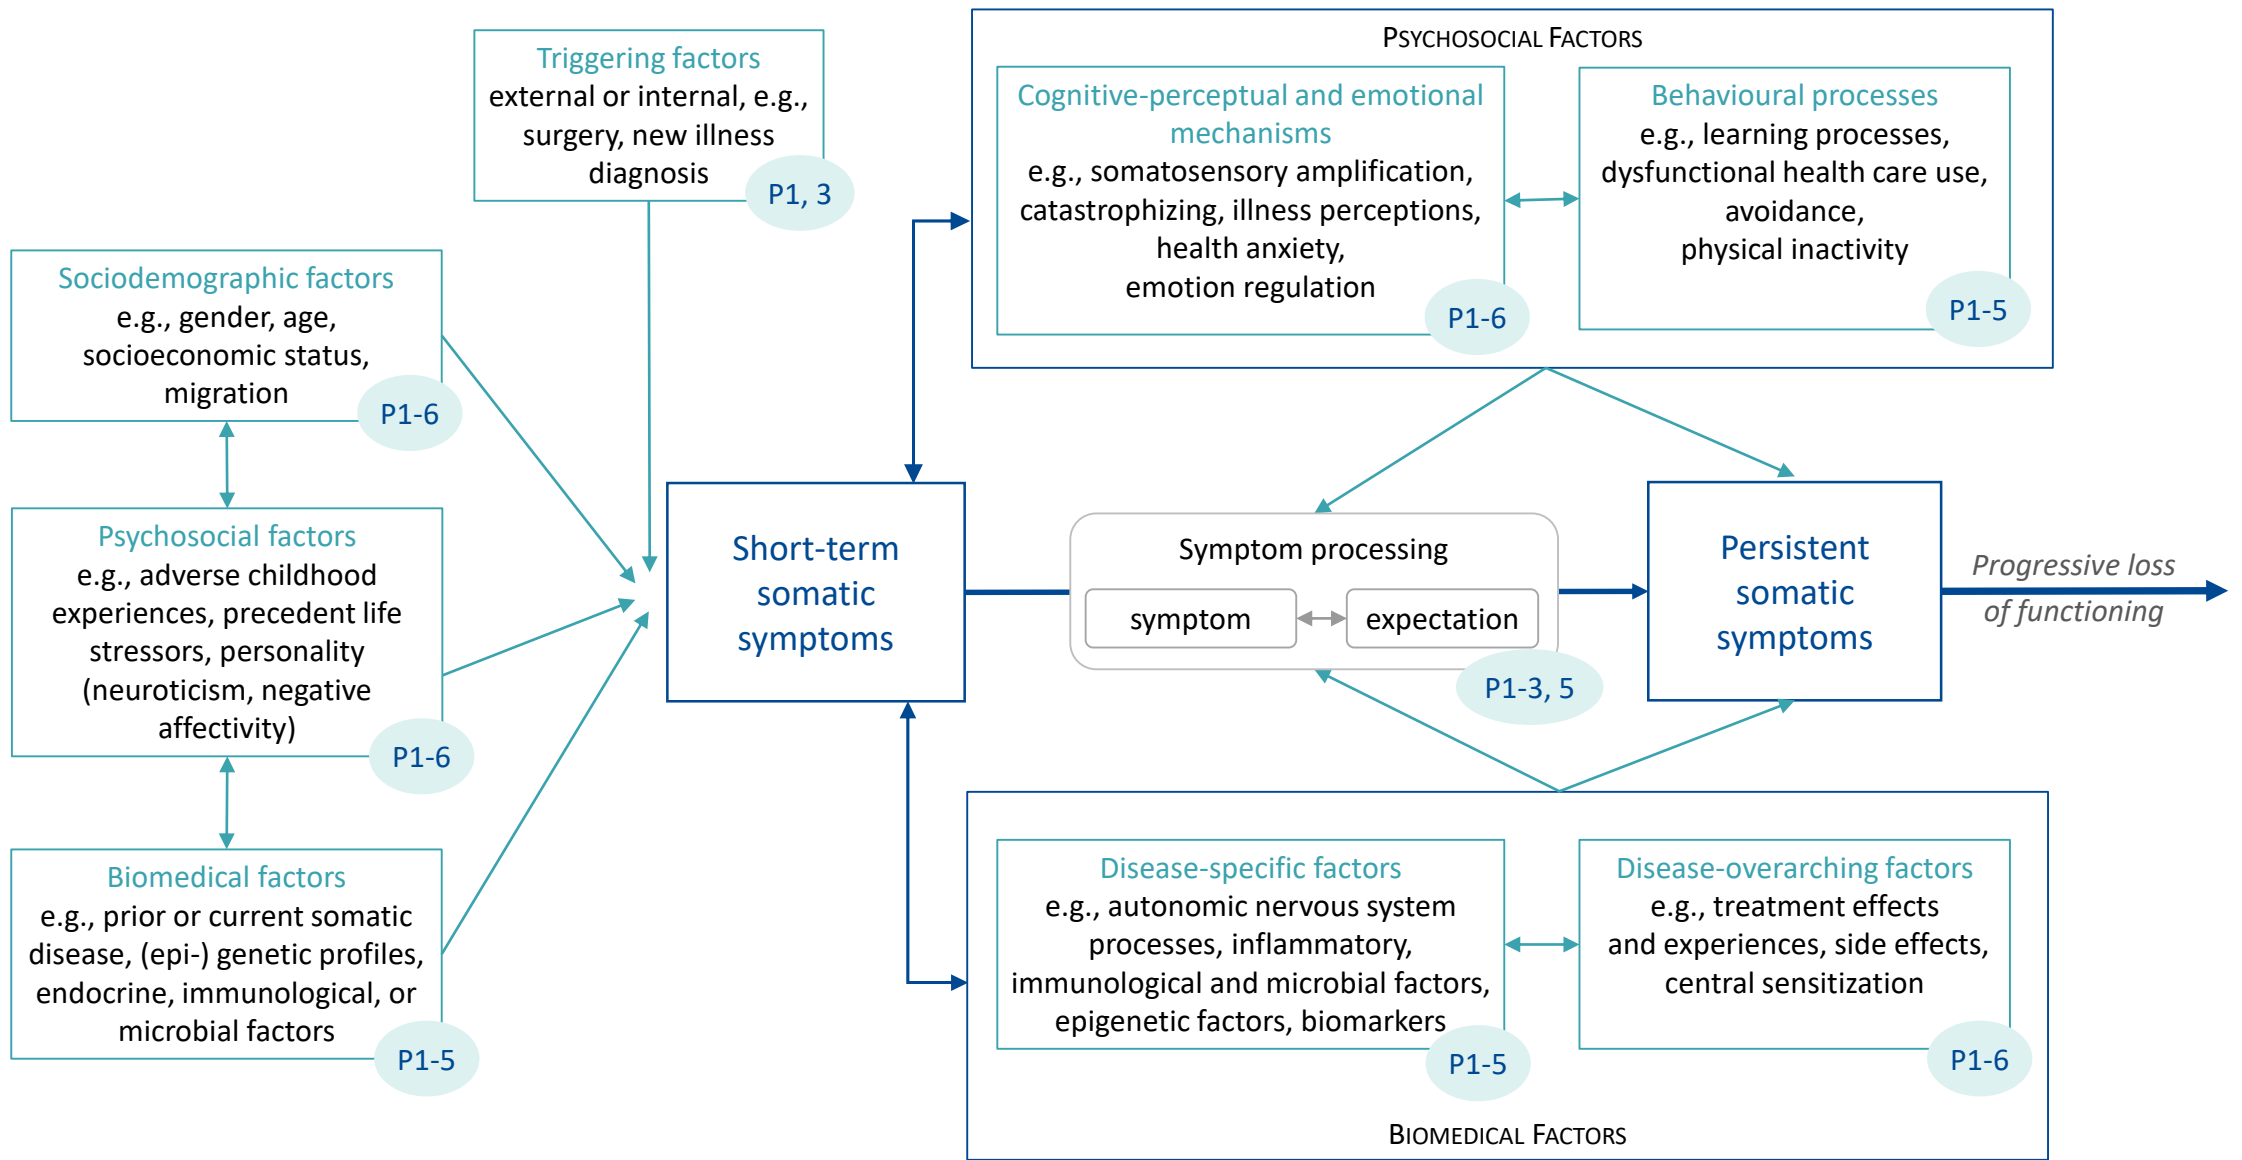

1  
2  
3  
4  
5  
6  
7  
8  
9  
10  
11  
12  
13  
14  
15  
16  
17  
18  
19  
20  
21  
22  
23  
24  
25  
26  
27  
28  
29  
30  
31  
32  
33  
34  
35  
36  
37  
38  
39  
40  
41

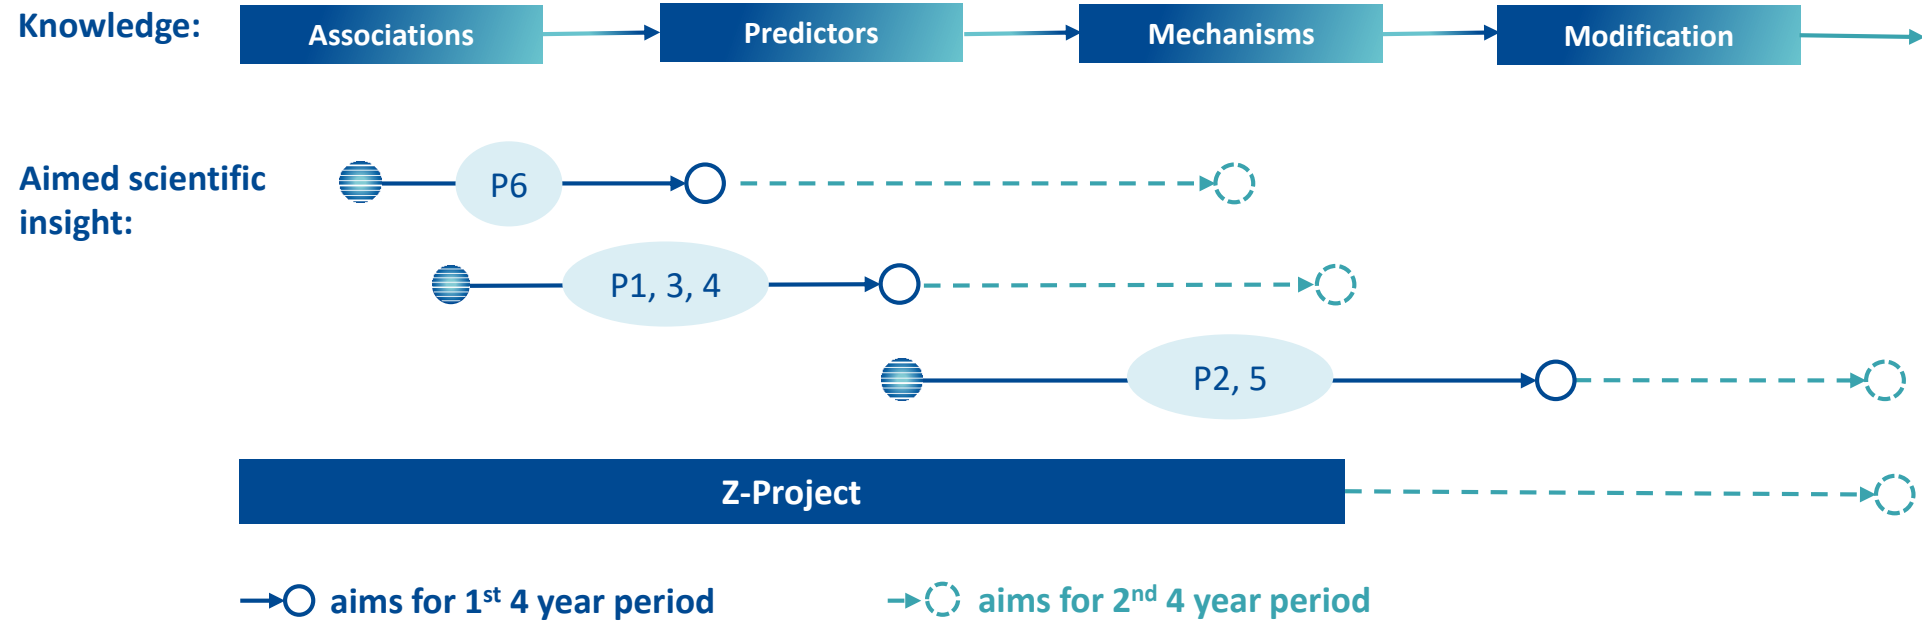

1  
2  
3  
4  
5  
6  
7  
8  
9  
10  
11  
12  
13  
14  
15  
16  
17  
18  
19  
20  
21  
22  
23  
24  
25  
26  
27  
28  
29  
30  
31  
32  
33  
34  
35  
36  
37  
38  
39  
40  
41

## Science

**INSIGHTS**  
Risk factors and mechanisms

**CROSSVALIDATION**  
Disease-specific and generic mechanisms

**DEVELOPMENT**  
Mechanism-based interventions

## Clinical care

**PREVENTION**  
Early recognition through risk scores

**TREATMENT**  
More targeted treatment by addressing mechanisms of action

**INTERDISCIPLINARITY**  
Better collaboration in patient care

## Competence building

**STRUCTURE**  
Collaboration through RU framework

**MUTUAL LEARNING**  
Communication between projects and targeted training

**EARLY CAREER**  
Fostering research careers within RU

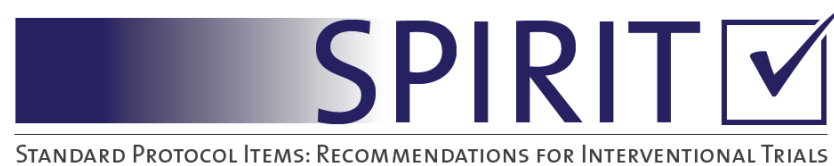

SPIRIT 2013 Checklist: Recommended items to address in a clinical trial protocol and related documents\*

| Section/item                      | Item No | Description                                                                                                                                                                                                                                                                              | Addressed on page number                                                                                                                     |
|-----------------------------------|---------|------------------------------------------------------------------------------------------------------------------------------------------------------------------------------------------------------------------------------------------------------------------------------------------|----------------------------------------------------------------------------------------------------------------------------------------------|
| <b>Administrative information</b> |         |                                                                                                                                                                                                                                                                                          |                                                                                                                                              |
| Title                             | 1       | Descriptive title identifying the study design, population, interventions, and, if applicable, trial acronym                                                                                                                                                                             | 1                                                                                                                                            |
| Trial registration                | 2a      | Trial identifier and registry name. If not yet registered, name of intended registry                                                                                                                                                                                                     | N/A – individual studies of research unit will be registered before start of recruitment (not this overall description of the research unit) |
|                                   | 2b      | All items from the World Health Organization Trial Registration Data Set                                                                                                                                                                                                                 | N/A see above                                                                                                                                |
| Protocol version                  | 3       | Date and version identifier                                                                                                                                                                                                                                                              | 1                                                                                                                                            |
| Funding                           | 4       | Sources and types of financial, material, and other support                                                                                                                                                                                                                              | 21                                                                                                                                           |
| Roles and responsibilities        | 5a      | Names, affiliations, and roles of protocol contributors                                                                                                                                                                                                                                  | 21                                                                                                                                           |
|                                   | 5b      | Name and contact information for the trial sponsor                                                                                                                                                                                                                                       | 21                                                                                                                                           |
|                                   | 5c      | Role of study sponsor and funders, if any, in study design; collection, management, analysis, and interpretation of data; writing of the report; and the decision to submit the report for publication, including whether they will have ultimate authority over any of these activities | 21                                                                                                                                           |



1  
2  
3  
4  
5  
6  
7  
8  
9  
10  
11  
12  
13  
14  
15  
16  
17  
18  
19  
20  
21  
22  
23  
24  
25  
26  
27  
28  
29  
30  
31  
32  
33  
34  
35  
36  
37  
38  
39  
40  
41  
42  
43  
44  
45  
46

|  |    |                                                                                                                                                                                                                                                                  |    |
|--|----|------------------------------------------------------------------------------------------------------------------------------------------------------------------------------------------------------------------------------------------------------------------|----|
|  | 5d | Composition, roles, and responsibilities of the coordinating centre, steering committee, endpoint adjudication committee, data management team, and other individuals or groups overseeing the trial, if applicable (see Item 21a for data monitoring committee) | 21 |
|--|----|------------------------------------------------------------------------------------------------------------------------------------------------------------------------------------------------------------------------------------------------------------------|----|

**Introduction**

|                          |    |                                                                                                                                                                                                    |      |
|--------------------------|----|----------------------------------------------------------------------------------------------------------------------------------------------------------------------------------------------------|------|
| Background and rationale | 6a | Description of research question and justification for undertaking the trial, including summary of relevant studies (published and unpublished) examining benefits and harms for each intervention | 6-13 |
|--------------------------|----|----------------------------------------------------------------------------------------------------------------------------------------------------------------------------------------------------|------|

|  |    |                                       |      |
|--|----|---------------------------------------|------|
|  | 6b | Explanation for choice of comparators | 9-13 |
|--|----|---------------------------------------|------|

|            |   |                                   |       |
|------------|---|-----------------------------------|-------|
| Objectives | 7 | Specific objectives or hypotheses | 13-14 |
|------------|---|-----------------------------------|-------|

|              |   |                                                                                                                                                                                                           |       |
|--------------|---|-----------------------------------------------------------------------------------------------------------------------------------------------------------------------------------------------------------|-------|
| Trial design | 8 | Description of trial design including type of trial (eg, parallel group, crossover, factorial, single group), allocation ratio, and framework (eg, superiority, equivalence, noninferiority, exploratory) | 14-18 |
|--------------|---|-----------------------------------------------------------------------------------------------------------------------------------------------------------------------------------------------------------|-------|

**Methods: Participants, interventions, and outcomes**

|               |   |                                                                                                                                                                                    |       |
|---------------|---|------------------------------------------------------------------------------------------------------------------------------------------------------------------------------------|-------|
| Study setting | 9 | Description of study settings (eg, community clinic, academic hospital) and list of countries where data will be collected. Reference to where list of study sites can be obtained | 14-15 |
|---------------|---|------------------------------------------------------------------------------------------------------------------------------------------------------------------------------------|-------|

|                      |    |                                                                                                                                                                                              |       |
|----------------------|----|----------------------------------------------------------------------------------------------------------------------------------------------------------------------------------------------|-------|
| Eligibility criteria | 10 | Inclusion and exclusion criteria for participants. If applicable, eligibility criteria for study centres and individuals who will perform the interventions (eg, surgeons, psychotherapists) | 15-16 |
|----------------------|----|----------------------------------------------------------------------------------------------------------------------------------------------------------------------------------------------|-------|

|               |     |                                                                                                                            |                                                                                              |
|---------------|-----|----------------------------------------------------------------------------------------------------------------------------|----------------------------------------------------------------------------------------------|
| Interventions | 11a | Interventions for each group with sufficient detail to allow replication, including how and when they will be administered | N/A – this is an overall study protocol for a research unit, not for an interventional study |
|---------------|-----|----------------------------------------------------------------------------------------------------------------------------|----------------------------------------------------------------------------------------------|

|    |                      |     |                                                                                                                                                                                                                                                                                                                                                                                |                                                                          |
|----|----------------------|-----|--------------------------------------------------------------------------------------------------------------------------------------------------------------------------------------------------------------------------------------------------------------------------------------------------------------------------------------------------------------------------------|--------------------------------------------------------------------------|
| 1  |                      | 11b | Criteria for discontinuing or modifying allocated interventions for a given trial participant (eg, drug dose change in response to harms, participant request, or improving/worsening disease)                                                                                                                                                                                 | N/A – described in individual study protocols of SOMACROSS research unit |
| 2  |                      |     |                                                                                                                                                                                                                                                                                                                                                                                |                                                                          |
| 3  |                      |     |                                                                                                                                                                                                                                                                                                                                                                                |                                                                          |
| 4  |                      |     |                                                                                                                                                                                                                                                                                                                                                                                |                                                                          |
| 5  |                      |     |                                                                                                                                                                                                                                                                                                                                                                                |                                                                          |
| 6  |                      |     |                                                                                                                                                                                                                                                                                                                                                                                |                                                                          |
| 7  |                      | 11c | Strategies to improve adherence to intervention protocols, and any procedures for monitoring adherence (eg, drug tablet return, laboratory tests)                                                                                                                                                                                                                              | N/A – see above                                                          |
| 8  |                      |     |                                                                                                                                                                                                                                                                                                                                                                                |                                                                          |
| 9  |                      | 11d | Relevant concomitant care and interventions that are permitted or prohibited during the trial                                                                                                                                                                                                                                                                                  | N/A – see above                                                          |
| 10 |                      |     |                                                                                                                                                                                                                                                                                                                                                                                |                                                                          |
| 11 |                      |     |                                                                                                                                                                                                                                                                                                                                                                                |                                                                          |
| 12 |                      |     |                                                                                                                                                                                                                                                                                                                                                                                |                                                                          |
| 13 | Outcomes             | 12  | Primary, secondary, and other outcomes, including the specific measurement variable (eg, systolic blood pressure), analysis metric (eg, change from baseline, final value, time to event), method of aggregation (eg, median, proportion), and time point for each outcome. Explanation of the clinical relevance of chosen efficacy and harm outcomes is strongly recommended | 16-17                                                                    |
| 14 |                      |     |                                                                                                                                                                                                                                                                                                                                                                                |                                                                          |
| 15 |                      |     |                                                                                                                                                                                                                                                                                                                                                                                |                                                                          |
| 16 |                      |     |                                                                                                                                                                                                                                                                                                                                                                                |                                                                          |
| 17 |                      |     |                                                                                                                                                                                                                                                                                                                                                                                |                                                                          |
| 18 |                      |     |                                                                                                                                                                                                                                                                                                                                                                                |                                                                          |
| 19 | Participant timeline | 13  | Time schedule of enrolment, interventions (including any run-ins and washouts), assessments, and visits for participants. A schematic diagram is highly recommended (see Figure)                                                                                                                                                                                               | N/A – see above                                                          |
| 20 |                      |     |                                                                                                                                                                                                                                                                                                                                                                                |                                                                          |
| 21 |                      |     |                                                                                                                                                                                                                                                                                                                                                                                |                                                                          |
| 22 | Sample size          | 14  | Estimated number of participants needed to achieve study objectives and how it was determined, including clinical and statistical assumptions supporting any sample size calculations                                                                                                                                                                                          | 18 – described in individual study protocols of SOMACROSS research unit  |
| 23 |                      |     |                                                                                                                                                                                                                                                                                                                                                                                |                                                                          |
| 24 |                      |     |                                                                                                                                                                                                                                                                                                                                                                                |                                                                          |
| 25 |                      |     |                                                                                                                                                                                                                                                                                                                                                                                |                                                                          |
| 26 |                      |     |                                                                                                                                                                                                                                                                                                                                                                                |                                                                          |
| 27 |                      |     |                                                                                                                                                                                                                                                                                                                                                                                |                                                                          |
| 28 |                      |     |                                                                                                                                                                                                                                                                                                                                                                                |                                                                          |
| 29 | Recruitment          | 15  | Strategies for achieving adequate participant enrolment to reach target sample size                                                                                                                                                                                                                                                                                            | N/A – see above                                                          |
| 30 |                      |     |                                                                                                                                                                                                                                                                                                                                                                                |                                                                          |

### Methods: Assignment of interventions (for controlled trials)

#### Allocation:

|    |                     |     |                                                                                                                                                                                                                                                                                                                                                          |                                                                          |
|----|---------------------|-----|----------------------------------------------------------------------------------------------------------------------------------------------------------------------------------------------------------------------------------------------------------------------------------------------------------------------------------------------------------|--------------------------------------------------------------------------|
| 35 | Sequence generation | 16a | Method of generating the allocation sequence (eg, computer-generated random numbers), and list of any factors for stratification. To reduce predictability of a random sequence, details of any planned restriction (eg, blocking) should be provided in a separate document that is unavailable to those who enrol participants or assign interventions | N/A – described in individual study protocols of SOMACROSS research unit |
| 36 |                     |     |                                                                                                                                                                                                                                                                                                                                                          |                                                                          |
| 37 |                     |     |                                                                                                                                                                                                                                                                                                                                                          |                                                                          |
| 38 |                     |     |                                                                                                                                                                                                                                                                                                                                                          |                                                                          |
| 39 |                     |     |                                                                                                                                                                                                                                                                                                                                                          |                                                                          |
| 40 |                     |     |                                                                                                                                                                                                                                                                                                                                                          |                                                                          |
| 41 |                     |     |                                                                                                                                                                                                                                                                                                                                                          |                                                                          |
| 42 |                     |     |                                                                                                                                                                                                                                                                                                                                                          |                                                                          |

|    |                    |     |                                                                                                              |                 |
|----|--------------------|-----|--------------------------------------------------------------------------------------------------------------|-----------------|
| 1  | Allocation         | 16b | Mechanism of implementing the allocation sequence (eg, central telephone; sequentially numbered,             | N/A – see above |
| 2  | concealment        |     | opaque, sealed envelopes), describing any steps to conceal the sequence until interventions are assigned     |                 |
| 3  | mechanism          |     |                                                                                                              |                 |
| 4  |                    |     |                                                                                                              |                 |
| 5  | Implementation     | 16c | Who will generate the allocation sequence, who will enrol participants, and who will assign participants to  | N/A – see above |
| 6  |                    |     | interventions                                                                                                |                 |
| 7  |                    |     |                                                                                                              |                 |
| 8  | Blinding (masking) | 17a | Who will be blinded after assignment to interventions (eg, trial participants, care providers, outcome       | N/A – see above |
| 9  |                    |     | assessors, data analysts), and how                                                                           |                 |
| 10 |                    |     |                                                                                                              |                 |
| 11 |                    | 17b | If blinded, circumstances under which unblinding is permissible, and procedure for revealing a participant’s | N/A – see above |
| 12 |                    |     | allocated intervention during the trial                                                                      |                 |
| 13 |                    |     |                                                                                                              |                 |
| 14 |                    |     |                                                                                                              |                 |

**Methods: Data collection, management, and analysis**

|    |                         |     |                                                                                                               |                    |
|----|-------------------------|-----|---------------------------------------------------------------------------------------------------------------|--------------------|
| 15 |                         |     |                                                                                                               |                    |
| 16 |                         |     |                                                                                                               |                    |
| 17 | Data collection methods | 18a | Plans for assessment and collection of outcome, baseline, and other trial data, including any related         | 15-17, Table 2     |
| 18 |                         |     | processes to promote data quality (eg, duplicate measurements, training of assessors) and a description of    |                    |
| 19 |                         |     | study instruments (eg, questionnaires, laboratory tests) along with their reliability and validity, if known. |                    |
| 20 |                         |     | Reference to where data collection forms can be found, if not in the protocol                                 |                    |
| 21 |                         |     |                                                                                                               |                    |
| 22 |                         | 18b | Plans to promote participant retention and complete follow-up, including list of any outcome data to be       | N/A – described in |
| 23 |                         |     | collected for participants who discontinue or deviate from intervention protocols                             | individual study   |
| 24 |                         |     |                                                                                                               | protocols of       |
| 25 |                         |     |                                                                                                               | SOMACROSS          |
| 26 |                         |     |                                                                                                               | research unit      |
| 27 |                         |     |                                                                                                               |                    |
| 28 | Data management         | 19  | Plans for data entry, coding, security, and storage, including any related processes to promote data quality  | 18                 |
| 29 |                         |     | (eg, double data entry; range checks for data values). Reference to where details of data management          |                    |
| 30 |                         |     | procedures can be found, if not in the protocol                                                               |                    |
| 31 |                         |     |                                                                                                               |                    |
| 32 | Statistical methods     | 20a | Statistical methods for analysing primary and secondary outcomes. Reference to where other details of the     | 18                 |
| 33 |                         |     | statistical analysis plan can be found, if not in the protocol                                                |                    |
| 34 |                         |     |                                                                                                               |                    |
| 35 |                         |     |                                                                                                               |                    |
| 36 |                         |     |                                                                                                               |                    |
| 37 |                         |     |                                                                                                               |                    |
| 38 |                         |     |                                                                                                               |                    |
| 39 |                         |     |                                                                                                               |                    |
| 40 |                         |     |                                                                                                               |                    |
| 41 |                         |     |                                                                                                               |                    |
| 42 |                         |     |                                                                                                               |                    |

|    |     |                                                                                                                                                                                 |                                                                         |
|----|-----|---------------------------------------------------------------------------------------------------------------------------------------------------------------------------------|-------------------------------------------------------------------------|
| 1  | 20b | Methods for any additional analyses (eg, subgroup and adjusted analyses)                                                                                                        | 18 – described in individual study protocols of SOMACROSS research unit |
| 2  |     |                                                                                                                                                                                 |                                                                         |
| 3  |     |                                                                                                                                                                                 |                                                                         |
| 4  |     |                                                                                                                                                                                 |                                                                         |
| 5  |     |                                                                                                                                                                                 |                                                                         |
| 6  |     |                                                                                                                                                                                 |                                                                         |
| 7  |     |                                                                                                                                                                                 |                                                                         |
| 8  | 20c | Definition of analysis population relating to protocol non-adherence (eg, as randomised analysis), and any statistical methods to handle missing data (eg, multiple imputation) | N/A – see above                                                         |
| 9  |     |                                                                                                                                                                                 |                                                                         |
| 10 |     |                                                                                                                                                                                 |                                                                         |

### Methods: Monitoring

|    |                 |     |                                                                                                                                                                                                                                                                                                                                       |                 |
|----|-----------------|-----|---------------------------------------------------------------------------------------------------------------------------------------------------------------------------------------------------------------------------------------------------------------------------------------------------------------------------------------|-----------------|
| 11 |                 |     |                                                                                                                                                                                                                                                                                                                                       |                 |
| 12 |                 |     |                                                                                                                                                                                                                                                                                                                                       |                 |
| 13 |                 |     |                                                                                                                                                                                                                                                                                                                                       |                 |
| 14 | Data monitoring | 21a | Composition of data monitoring committee (DMC); summary of its role and reporting structure; statement of whether it is independent from the sponsor and competing interests; and reference to where further details about its charter can be found, if not in the protocol. Alternatively, an explanation of why a DMC is not needed | N/A – see above |
| 15 |                 |     |                                                                                                                                                                                                                                                                                                                                       |                 |
| 16 |                 |     |                                                                                                                                                                                                                                                                                                                                       |                 |
| 17 |                 |     |                                                                                                                                                                                                                                                                                                                                       |                 |
| 18 |                 |     |                                                                                                                                                                                                                                                                                                                                       |                 |
| 19 |                 | 21b | Description of any interim analyses and stopping guidelines, including who will have access to these interim results and make the final decision to terminate the trial                                                                                                                                                               | N/A – see above |
| 20 |                 |     |                                                                                                                                                                                                                                                                                                                                       |                 |
| 21 |                 |     |                                                                                                                                                                                                                                                                                                                                       |                 |
| 22 | Harms           | 22  | Plans for collecting, assessing, reporting, and managing solicited and spontaneously reported adverse events and other unintended effects of trial interventions or trial conduct                                                                                                                                                     | N/A – see above |
| 23 |                 |     |                                                                                                                                                                                                                                                                                                                                       |                 |
| 24 |                 |     |                                                                                                                                                                                                                                                                                                                                       |                 |
| 25 |                 |     |                                                                                                                                                                                                                                                                                                                                       |                 |
| 26 | Auditing        | 23  | Frequency and procedures for auditing trial conduct, if any, and whether the process will be independent from investigators and the sponsor                                                                                                                                                                                           | N/A – see above |
| 27 |                 |     |                                                                                                                                                                                                                                                                                                                                       |                 |
| 28 |                 |     |                                                                                                                                                                                                                                                                                                                                       |                 |

### Ethics and dissemination

|    |                          |    |                                                                                                                                                                                                                                  |                                                                         |
|----|--------------------------|----|----------------------------------------------------------------------------------------------------------------------------------------------------------------------------------------------------------------------------------|-------------------------------------------------------------------------|
| 29 |                          |    |                                                                                                                                                                                                                                  |                                                                         |
| 30 |                          |    |                                                                                                                                                                                                                                  |                                                                         |
| 31 | Research ethics approval | 24 | Plans for seeking research ethics committee/institutional review board (REC/IRB) approval                                                                                                                                        | 19                                                                      |
| 32 |                          |    |                                                                                                                                                                                                                                  |                                                                         |
| 33 |                          |    |                                                                                                                                                                                                                                  |                                                                         |
| 34 | Protocol amendments      | 25 | Plans for communicating important protocol modifications (eg, changes to eligibility criteria, outcomes, analyses) to relevant parties (eg, investigators, REC/IRBs, trial participants, trial registries, journals, regulators) | 18 – described in individual study protocols of SOMACROSS research unit |
| 35 |                          |    |                                                                                                                                                                                                                                  |                                                                         |
| 36 |                          |    |                                                                                                                                                                                                                                  |                                                                         |
| 37 |                          |    |                                                                                                                                                                                                                                  |                                                                         |
| 38 |                          |    |                                                                                                                                                                                                                                  |                                                                         |
| 39 |                          |    |                                                                                                                                                                                                                                  |                                                                         |
| 40 |                          |    |                                                                                                                                                                                                                                  |                                                                         |
| 41 |                          |    |                                                                                                                                                                                                                                  |                                                                         |
| 42 |                          |    |                                                                                                                                                                                                                                  |                                                                         |

|    |                               |     |                                                                                                                                                                                                                                                                                     |                                                                         |
|----|-------------------------------|-----|-------------------------------------------------------------------------------------------------------------------------------------------------------------------------------------------------------------------------------------------------------------------------------------|-------------------------------------------------------------------------|
| 1  | Consent or assent             | 26a | Who will obtain informed consent or assent from potential trial participants or authorised surrogates, and how (see Item 32)                                                                                                                                                        | N/A – see above                                                         |
| 2  |                               |     |                                                                                                                                                                                                                                                                                     |                                                                         |
| 3  |                               |     |                                                                                                                                                                                                                                                                                     |                                                                         |
| 4  |                               | 26b | Additional consent provisions for collection and use of participant data and biological specimens in ancillary studies, if applicable                                                                                                                                               | N/A – see above                                                         |
| 5  |                               |     |                                                                                                                                                                                                                                                                                     |                                                                         |
| 6  |                               |     |                                                                                                                                                                                                                                                                                     |                                                                         |
| 7  | Confidentiality               | 27  | How personal information about potential and enrolled participants will be collected, shared, and maintained in order to protect confidentiality before, during, and after the trial                                                                                                | N/A – see above                                                         |
| 8  |                               |     |                                                                                                                                                                                                                                                                                     |                                                                         |
| 9  |                               |     |                                                                                                                                                                                                                                                                                     |                                                                         |
| 10 | Declaration of interests      | 28  | Financial and other competing interests for principal investigators for the overall trial and each study site                                                                                                                                                                       | 22                                                                      |
| 11 |                               |     |                                                                                                                                                                                                                                                                                     |                                                                         |
| 12 |                               |     |                                                                                                                                                                                                                                                                                     |                                                                         |
| 13 | Access to data                | 29  | Statement of who will have access to the final trial dataset, and disclosure of contractual agreements that limit such access for investigators                                                                                                                                     | 18 – described in individual study protocols of SOMACROSS research unit |
| 14 |                               |     |                                                                                                                                                                                                                                                                                     |                                                                         |
| 15 |                               |     |                                                                                                                                                                                                                                                                                     |                                                                         |
| 16 |                               |     |                                                                                                                                                                                                                                                                                     |                                                                         |
| 17 |                               |     |                                                                                                                                                                                                                                                                                     |                                                                         |
| 18 |                               |     |                                                                                                                                                                                                                                                                                     |                                                                         |
| 19 |                               |     |                                                                                                                                                                                                                                                                                     |                                                                         |
| 20 | Ancillary and post-trial care | 30  | Provisions, if any, for ancillary and post-trial care, and for compensation to those who suffer harm from trial participation                                                                                                                                                       | N/A – proband insurance was concluded                                   |
| 21 |                               |     |                                                                                                                                                                                                                                                                                     |                                                                         |
| 22 |                               |     |                                                                                                                                                                                                                                                                                     |                                                                         |
| 23 |                               |     |                                                                                                                                                                                                                                                                                     |                                                                         |
| 24 |                               |     |                                                                                                                                                                                                                                                                                     |                                                                         |
| 25 | Dissemination policy          | 31a | Plans for investigators and sponsor to communicate trial results to participants, healthcare professionals, the public, and other relevant groups (eg, via publication, reporting in results databases, or other data sharing arrangements), including any publication restrictions | 19-20                                                                   |
| 26 |                               |     |                                                                                                                                                                                                                                                                                     |                                                                         |
| 27 |                               |     |                                                                                                                                                                                                                                                                                     |                                                                         |
| 28 |                               |     |                                                                                                                                                                                                                                                                                     |                                                                         |
| 29 |                               | 31b | Authorship eligibility guidelines and any intended use of professional writers                                                                                                                                                                                                      | N/A                                                                     |
| 30 |                               |     |                                                                                                                                                                                                                                                                                     |                                                                         |
| 31 |                               | 31c | Plans, if any, for granting public access to the full protocol, participant-level dataset, and statistical code                                                                                                                                                                     | 19-20                                                                   |
| 32 |                               |     |                                                                                                                                                                                                                                                                                     |                                                                         |
| 33 |                               |     |                                                                                                                                                                                                                                                                                     |                                                                         |

## Appendices

|    |                            |    |                                                                                                                                                                                                |                                                                                       |
|----|----------------------------|----|------------------------------------------------------------------------------------------------------------------------------------------------------------------------------------------------|---------------------------------------------------------------------------------------|
| 1  | Informed consent materials | 32 | Model consent form and other related documentation given to participants and authorised surrogates                                                                                             | 15, 19 – described in detail in individual study protocols of SOMACROSS research unit |
| 2  |                            |    |                                                                                                                                                                                                |                                                                                       |
| 3  |                            |    |                                                                                                                                                                                                |                                                                                       |
| 4  |                            |    |                                                                                                                                                                                                |                                                                                       |
| 5  |                            |    |                                                                                                                                                                                                |                                                                                       |
| 6  |                            |    |                                                                                                                                                                                                |                                                                                       |
| 7  |                            |    |                                                                                                                                                                                                |                                                                                       |
| 8  |                            |    |                                                                                                                                                                                                |                                                                                       |
| 9  | Biological specimens       | 33 | Plans for collection, laboratory evaluation, and storage of biological specimens for genetic or molecular analysis in the current trial and for future use in ancillary studies, if applicable | 17– described in detail in individual study protocols of SOMACROSS research unit      |
| 10 |                            |    |                                                                                                                                                                                                |                                                                                       |
| 11 |                            |    |                                                                                                                                                                                                |                                                                                       |
| 12 |                            |    |                                                                                                                                                                                                |                                                                                       |
| 13 |                            |    |                                                                                                                                                                                                |                                                                                       |
| 14 |                            |    |                                                                                                                                                                                                |                                                                                       |
| 15 |                            |    |                                                                                                                                                                                                |                                                                                       |

\*It is strongly recommended that this checklist be read in conjunction with the SPIRIT 2013 Explanation & Elaboration for important clarification on the items. Amendments to the protocol should be tracked and dated. The SPIRIT checklist is copyrighted by the SPIRIT Group under the Creative Commons [“Attribution-NonCommercial-NoDerivs 3.0 Unported”](#) license.

# BMJ Open

## Persistent SOMatic Symptoms ACROSS Diseases - From Risk Factors to Modification: Scientific Framework and Overarching Protocol of the Interdisciplinary SOMACROSS Research Unit (RU 5211)

|                                 |                                                                                                                                                                                                                                                                                                                                                                                                                                                                                                                                                                                                                                                                                                                                                                                                                                                                                                                                                                                                                                                                                                                                                                                                                                                                                                                                                                                                                                                                                                                                                                                                                                                                           |
|---------------------------------|---------------------------------------------------------------------------------------------------------------------------------------------------------------------------------------------------------------------------------------------------------------------------------------------------------------------------------------------------------------------------------------------------------------------------------------------------------------------------------------------------------------------------------------------------------------------------------------------------------------------------------------------------------------------------------------------------------------------------------------------------------------------------------------------------------------------------------------------------------------------------------------------------------------------------------------------------------------------------------------------------------------------------------------------------------------------------------------------------------------------------------------------------------------------------------------------------------------------------------------------------------------------------------------------------------------------------------------------------------------------------------------------------------------------------------------------------------------------------------------------------------------------------------------------------------------------------------------------------------------------------------------------------------------------------|
| Journal:                        | <i>BMJ Open</i>                                                                                                                                                                                                                                                                                                                                                                                                                                                                                                                                                                                                                                                                                                                                                                                                                                                                                                                                                                                                                                                                                                                                                                                                                                                                                                                                                                                                                                                                                                                                                                                                                                                           |
| Manuscript ID                   | bmjopen-2021-057596.R1                                                                                                                                                                                                                                                                                                                                                                                                                                                                                                                                                                                                                                                                                                                                                                                                                                                                                                                                                                                                                                                                                                                                                                                                                                                                                                                                                                                                                                                                                                                                                                                                                                                    |
| Article Type:                   | Protocol                                                                                                                                                                                                                                                                                                                                                                                                                                                                                                                                                                                                                                                                                                                                                                                                                                                                                                                                                                                                                                                                                                                                                                                                                                                                                                                                                                                                                                                                                                                                                                                                                                                                  |
| Date Submitted by the Author:   | 10-Nov-2021                                                                                                                                                                                                                                                                                                                                                                                                                                                                                                                                                                                                                                                                                                                                                                                                                                                                                                                                                                                                                                                                                                                                                                                                                                                                                                                                                                                                                                                                                                                                                                                                                                                               |
| Complete List of Authors:       | Löwe, Bernd; University Medical Center Hamburg-Eppendorf, Department of Psychosomatic Medicine and Psychotherapy<br>Andresen, Viola; Israelitisches Krankenhaus Hamburg<br>Van den Bergh, Omer; KU Leuven, Health Psychology<br>Huber, Tobias B.; University Medical Center Hamburg-Eppendorf, III. Department of Medicine<br>von dem Knesebeck, Olaf; University Medical Center Hamburg-Eppendorf, Medical Sociology<br>Lohse, Ansgar W.; University Medical Center Hamburg-Eppendorf, I. Department of Medicine<br>Nestoriuc, Yvonne; Helmut-Schmidt-University / University of the Armed Forces Hamburg, Department of Psychology; University Medical Center Hamburg-Eppendorf<br>Schneider, Gudrun; Universitätsklinikum Münster, Department of Psychosomatic Medicine and Psychotherapy<br>Schneider, Stefan W.; University Medical Center Hamburg-Eppendorf, Department of Dermatology and Venerology<br>Schramm, Christoph; University Medical Center Hamburg-Eppendorf, I. Department of Medicine; University Medical Center Hamburg-Eppendorf, Martin Zeitz Center for Rare Diseases<br>Ständer, Sonja; Universitätsklinikum Münster, Department of Dermatology<br>Vettorazzi, Eik; University Medical Center Hamburg-Eppendorf, Medical Biometry and Epidemiology<br>Zapf, Antonia ; University Medical Center Hamburg-Eppendorf, Medical Biometry and Epidemiology<br>Shedden-Mora, Meike; MSH Medical School Hamburg, Department of Psychology; University Medical Center Hamburg-Eppendorf, Department of Psychosomatic Medicine and Psychotherapy<br>Toussaint, Anne; University Medical Center Hamburg-Eppendorf, Psychosomatic Medicine and Psychotherapy |
| <b>Primary Subject Heading</b>: | Mental health                                                                                                                                                                                                                                                                                                                                                                                                                                                                                                                                                                                                                                                                                                                                                                                                                                                                                                                                                                                                                                                                                                                                                                                                                                                                                                                                                                                                                                                                                                                                                                                                                                                             |
| Secondary Subject Heading:      | Dermatology, Gastroenterology and hepatology                                                                                                                                                                                                                                                                                                                                                                                                                                                                                                                                                                                                                                                                                                                                                                                                                                                                                                                                                                                                                                                                                                                                                                                                                                                                                                                                                                                                                                                                                                                                                                                                                              |
| Keywords:                       | Adult dermatology < DERMATOLOGY, Functional bowel disorders <                                                                                                                                                                                                                                                                                                                                                                                                                                                                                                                                                                                                                                                                                                                                                                                                                                                                                                                                                                                                                                                                                                                                                                                                                                                                                                                                                                                                                                                                                                                                                                                                             |

1  
2  
3  
4  
5  
6  
7  
8  
9  
10  
11  
12  
13  
14  
15  
16  
17  
18  
19  
20  
21  
22  
23  
24  
25  
26  
27  
28  
29  
30  
31  
32  
33  
34  
35  
36  
37  
38  
39  
40  
41  
42  
43  
44  
45  
46  
47  
48  
49  
50  
51  
52  
53  
54  
55  
56  
57  
58  
59  
60

|  |                                                                                                                                                           |
|--|-----------------------------------------------------------------------------------------------------------------------------------------------------------|
|  | GASTROENTEROLOGY, Gastroenterology < INTERNAL MEDICINE, Hepatology < INTERNAL MEDICINE, Chronic renal failure < NEPHROLOGY, Adult psychiatry < PSYCHIATRY |
|  |                                                                                                                                                           |

SCHOLARONE™  
Manuscripts



1  
2  
3 **Persistent SOMatic Symptoms ACROSS Diseases - From Risk Factors to**  
4  
5 **Modification: Scientific Framework and Overarching Protocol of the**  
6  
7 **Interdisciplinary SOMACROSS Research Unit (RU 5211)**  
8  
9  
10

11 *Hamburg, Germany, November 10, 2021, Version 3.1*  
12  
13  
14  
15

16 Bernd Löwe, MD<sup>a</sup>; Viola Andresen, MD<sup>b</sup>; Omer Van den Bergh, PhD<sup>c</sup>; Tobias B. Huber, MD<sup>d</sup>;  
17  
18 Olaf von dem Knesebeck, PhD<sup>e</sup>; Ansgar W. Lohse, MD<sup>f</sup>; Yvonne Nestoriuc, PhD<sup>g,h</sup>; Gudrun  
19  
20 Schneider, MD<sup>i</sup>; Stefan W. Schneider, MD<sup>i</sup>; Christoph Schramm, MD<sup>f,k</sup>; Sonja Ständer, MD<sup>i</sup>;  
21  
22 Eik Vettorazzi<sup>m</sup>; Antonia Zapf, PhD<sup>m</sup>; Meike Shedden-Mora,<sup>\*</sup> PhD<sup>a,n</sup>; Anne Toussaint,<sup>\*</sup> PhD<sup>a</sup>  
23  
24 <sup>\*</sup> shared last authorship; both authors contributed equally  
25  
26  
27

28 <sup>a</sup> Department of Psychosomatic Medicine and Psychotherapy, University Medical Centre Hamburg-  
29  
30 Eppendorf, Hamburg, Germany  
31

32 <sup>b</sup> Israelitisches Krankenhaus, Hamburg, Germany  
33

34 <sup>c</sup> Health Psychology, University of Leuven, Leuven, Belgium  
35

36 <sup>d</sup> III. Department of Medicine, University Medical Centre Hamburg-Eppendorf, Hamburg, Germany  
37

38 <sup>e</sup> Institute of Medical Sociology, University Medical Centre Hamburg-Eppendorf, Hamburg, Germany  
39

40 <sup>f</sup> I. Department of Medicine, University Medical Centre Hamburg-Eppendorf, Hamburg, Germany  
41

42 <sup>g</sup> Helmut-Schmidt-University, University of the Federal Armed Forces, Hamburg, Germany  
43

44 <sup>h</sup> Systems Neuroscience, University Medical Centre Hamburg-Eppendorf, Hamburg, Germany  
45

46 <sup>i</sup> Department of Psychosomatic Medicine and Psychotherapy, University Hospital Münster, Germany  
47

48 <sup>j</sup> Department of Dermatology and Venerology, University Medical Centre Hamburg-Eppendorf,  
49  
50 Hamburg, Germany

51 <sup>k</sup> Martin Zeitz Center for Rare Diseases, University Medical Centre Hamburg-Eppendorf, Hamburg,  
52  
53 Germany

54 <sup>l</sup> Centre of Chronic Pruritus, Department of Dermatology, University Hospital Münster, Germany  
55

56 <sup>m</sup> Department of Medical Biometry and Epidemiology, University Medical Centre Hamburg-Eppendorf,  
57  
58 Hamburg, Germany  
59

60 <sup>n</sup> Department of Psychology, Medical School Hamburg, Hamburg, Germany

1  
2  
3  
4  
5 **Address for correspondence:**  
6

7 Bernd Löwe, MD; Professor of Medicine  
8

9 Department of Psychosomatic Medicine and Psychotherapy  
10

11 University Medical Centre Hamburg-Eppendorf  
12

13 Martinistraße 52, 20246 Hamburg, Germany  
14

15 Phone: +49-40-7410-59733, Fax: +49-40-7410-54975, E-mail: b.loewe@uke.de  
16  
17

18  
19 Word count: 3997 words (not including abstract, tables, and references), 2 tables, 4 figures  
20  
21

22  
23  
24 Please note: This study protocol of the SOMACROSS research unit has undergone  
25  
26 independent peer review to gain funding from the German Research Foundation (Deutsche  
27  
28 Forschungsgemeinschaft, DFG). The SOMACROSS research unit is funded by the German  
29  
30 Research Foundation (<https://gepris.dfg.de/gepris/projekt/445297796>) from September 2021  
31  
32 to August 2025. All individual projects of the research unit have received formal ethical  
33  
34 approval by the Ethics Committee of the Hamburg Medical Association, Hamburg, Germany,  
35  
36 on January 25, 2021, and the Ethics Committee of the Medical Association of Westphalia-  
37  
38 Lippe / Westphalian Wilhelms University, Münster, Germany on October 9, 2020.  
39  
40

41  
42  
43 Reference numbers of the Ethics Committee of the Hamburg Medical Association, Hamburg,  
44  
45 Germany:  
46

47 Project 1: 2020-10196-BO-ff, Project 2: 2020-10198-BO-ff, Project 3: 2020-10195-BO-ff,  
48

49 Project 4: 2020-10200-BO-ff, Project 5: 2020-10197-BO-ff, Project 6: 2020-10194-BO-ff  
50  
51

52  
53 Reference number of the Ethics Committee of the Medical Association of Westphalia-Lippe /  
54  
55 Westphalian Wilhelms University, Münster, Germany:  
56

57 Project 4: 2020-676-f-S  
58  
59  
60

## ABSTRACT:

Introduction: Persistent Somatic Symptoms (PSS) are highly prevalent in all areas of medicine; they are disabling for patients and costly for society. The subjective symptom burden often correlates poorly with the underlying disease severity, and patients' needs for effective treatment are far from being met. Initial evidence indicates that, in addition to disease-specific pathophysiological processes, psychological factors such as expectations, somatosensory amplification, and prior illness experiences contribute to symptom persistence in functional as well as in somatic diseases. However, prospective studies investigating the transition from acute to chronic somatic symptoms, integrating pathophysiological, psychological, and social factors, are scarce. A better understanding of the multifactorial mechanisms of symptom persistence is crucial for developing targeted mechanism-based interventions for effective prevention and treatment of PSS. Thus, the overall aim of the interdisciplinary SOMACROSS research unit is to identify generic and disease-specific risk factors and aetiological mechanisms of symptom persistence across a range of diseases.

Methods and analysis: Seven projects will investigate risk factors and mechanisms of symptom persistence in a total of 3,916 patients across ten medical conditions. All study designs are prospective and share common assessment points, core instruments, and outcome variables to allow comparison and validation of results across projects and conditions. Research will focus on the identification of generic and disease-specific mechanisms associated with unfavourable symptom course. The development of a multivariate prediction model will facilitate the understanding of the course of PSS across diseases.

Ethics and dissemination: All individual SOMACROSS studies were approved by the ethics committees of Hamburg and Münster, Germany. Findings will be disseminated through peer-reviewed publications, scientific conferences, and the involvement of relevant stakeholders, patients and the lay public. This interdisciplinary research unit will fundamentally contribute to

1  
2  
3 earlier recognition of patients at risk, and to the development of prevention and tailored  
4  
5 treatment concepts for PSS.  
6  
7  
8

9  
10 **Key words**

11 Persistent Somatic Symptoms; Mechanisms; Risk Factors; Expectations; Research Unit;  
12  
13 Biopsychosocial Models; Prediction Models  
14  
15  
16  
17  
18  
19  
20  
21  
22  
23  
24  
25  
26  
27  
28  
29  
30  
31  
32  
33  
34  
35  
36  
37  
38  
39  
40  
41  
42  
43  
44  
45  
46  
47  
48  
49  
50  
51  
52  
53  
54  
55  
56  
57  
58  
59  
60

For peer review only

## STRENGTHS AND LIMITATIONS OF THIS STUDY

- Although persistent somatic symptoms (PSS) are highly prevalent among various diseases, distressing and disabling for patients and costly for society, mechanisms of symptom persistence are rarely investigated and poorly understood.
- The SOMACROSS research unit goes beyond previous research by determining the complex and dynamic biopsychosocial interplay contributing to persistent symptom states in a number of different syndromes and diseases.
- In order to detect patterns of symptom persistence across diseases, the SOMACROSS research unit aims to identify potential risk factors and mechanisms of PSS across various somatic diseases, functional syndromes and somatoform disorders using a common working model, joint core measures, prospective designs and coordinated evaluation methods.
- The SOMACROSS research unit uses a multidisciplinary approach to overcome today's highly fragmented research on PSS and provide pathways to developing efficient disease-overarching intervention strategies.
- Despite investigating multiple potential risk factors and mechanisms of the persistence of somatic symptoms, other variables might be relevant; and conclusions can only be drawn for the conditions under investigation.

## INTRODUCTION

### State of the art

#### Definition: Persistent Somatic Symptoms (PSS)

The term 'Persistent Somatic Symptoms (PSS)' is used as an umbrella term to describe subjectively distressing somatic complaints, irrespective of their aetiology, that are present on most days for at least several months. PSS are operationalised by repeated measures of patients' subjective somatic symptom severity.

PSS across medical fields: PSS are highly prevalent in all fields of medicine, from primary to specialized care and mental health care,<sup>1 2</sup> yet remain greatly neglected in research.<sup>3</sup>

Complaints may include pain, gastroenterological, cardiovascular, genito-urinary, neurological or other symptoms (**Figure 1**). Regardless of their aetiology, PSS cause substantial suffering, impaired quality of life and work participation.<sup>4 5</sup> Many somatic symptoms are neither exclusive correlates of somatic disease (e.g., vascular or inflammatory disease) nor exclusive symptoms of a mental disorder (e.g., depressive or anxiety disorders).<sup>2 6 7</sup> Thus, a dualistic view classifying symptoms as either somatic or psychological is neither evidence-based nor patient-centred.<sup>8</sup> With reference to the description of bodily distress disorder in the International Classification of Diseases, 11<sup>th</sup> edition (ICD-11), the term 'persistent' here defines somatic symptoms which are present on most days for at least several months.<sup>9</sup>

*Please insert **Figure 1** approximately here*

Impact on patients – challenges in health care: Eighty percent of the general population experience one or more symptoms within one month.<sup>10-12</sup> Somatic symptoms account for the majority of all primary and secondary care consultations.<sup>13 14</sup> Whereas in most cases, symptoms fluctuate naturally and eventually disappear, about one fourth of individuals with acute symptoms develop PSS and remain affected one year after their first consultation.<sup>8</sup>

1  
2  
3 Often, these symptoms are accompanied by comorbid depression and anxiety<sup>2</sup> and an  
4 increased risk for suicidal ideation and attempts.<sup>15 16</sup> PSS are costly for society,<sup>17 18</sup> and  
5 health care for PSS is challenging.<sup>19</sup> The clinical reality is characterized by fragmented  
6 treatment in specialized care (e.g., gastrointestinal symptoms in gastroenterology, chest pain  
7 in cardiology), even though patients often report multiple or overlapping symptoms.<sup>20</sup>  
8  
9  
10  
11  
12  
13  
14  
15

#### From 'medically unexplained' to a broader understanding of distressing persistent somatic

16 symptoms: Most research on PSS has been conducted on so called 'medically unexplained  
17 symptoms', a term mainly used in primary care, while specialised medical fields more  
18 commonly employ the term 'functional syndromes'.<sup>21</sup> The 'medical inexplicability' of the  
19 symptoms was also the defining diagnostic criterion of the earlier diagnosis of somatoform  
20 and related disorders in the Diagnostic and Statistical Manual for Mental Disorders, 4th  
21 edition (DSM-IV),<sup>22</sup> and the International Classification of Diseases, 10th edition (ICD-10).<sup>23</sup>  
22 The concept of medical inexplicability of somatic symptoms is considered problematic  
23 because (1) the label 'medically unexplained' for disabling symptoms creates distress in  
24 patients<sup>24</sup>, (2) the reliability of assessing whether or not there is a pathophysiological  
25 explanation for a certain symptom is notoriously poor, (3) the concept reinforces a mind-  
26 body-dualism.<sup>8</sup>, and (4) many patients disapproved of the term.<sup>25</sup> Therefore, a new  
27 conceptualization was introduced namely Somatic Symptom Disorder (SSD in DSM-5)<sup>26</sup> and  
28 Bodily Distress Disorder (BDD in ICD-10),<sup>9</sup> incorporating features of persistent and clinically  
29 significant somatic complaints which are accompanied by excessive and disproportionate  
30 health-related concerns, feelings, and behaviours. SSD and BDD may or may not be  
31 accompanied by a somatic disease.<sup>27</sup> Of note, patients with 'medically explained' and  
32 'unexplained' symptoms are equally impaired.<sup>4 5</sup>  
33  
34  
35  
36  
37  
38  
39  
40  
41  
42  
43  
44  
45  
46  
47  
48  
49  
50  
51  
52  
53  
54  
55

#### Transferability of psychosocial aetiological mechanisms from functional and somatoform

56 disorders to somatic diseases: Most research on aetiological mechanisms of PSS has been  
57 conducted in somatoform and functional syndromes. The question arises whether these  
58  
59  
60

1  
2  
3 findings can be transferred to SSD and BDS, and beyond that, to PSS in somatic diseases.  
4  
5 There is initial evidence that – in addition to the underlying pathophysiology – psychosocial  
6  
7 factors play a relevant role in the development and persistence of symptoms in somatic  
8  
9 diseases. For example, previous studies by our group indicated that patients' beliefs about  
10  
11 their disease strongly influence recovery after coronary artery bypass surgery,<sup>28</sup> that pre-  
12  
13 treatment expectations significantly predict patient-reported long-term side-effects and quality  
14  
15 of life in women receiving endocrine breast cancer treatment,<sup>29</sup> and that the extent of illness  
16  
17 anxiety before gastrointestinal infection predicts the development of post-infectious irritable  
18  
19 bowel syndrome after seven months.<sup>30</sup> The understanding of psychosocial factors, in turn,  
20  
21 can help improve treatment for patients with PSS. First evidence in support of this is  
22  
23 available from the PSY-HEART trial, a three-arm randomized clinical trial in which a  
24  
25 preoperative optimisation of patient expectations prior to coronary artery bypass graft surgery  
26  
27 led to a reduction of post-operative disability compared to usual surgery care alone.<sup>31</sup>  
28  
29 Even though it remains unclear how PSS evolve and are maintained over time, their  
30  
31 presence in various somatic diseases is associated with a faster disease progression, more  
32  
33 severe complications, and increased mortality.<sup>32-34</sup> Further evidence supporting the important  
34  
35 role of psychosocial factors in the persistence of symptoms in somatic diseases is provided  
36  
37 by the observation that symptom burden frequently persists although the underlying  
38  
39 pathophysiology has been optimally treated.<sup>5 35</sup> In addition to disease-specific treatment,  
40  
41 psychological treatment and centrally acting pharmacotherapy appear to be the most  
42  
43 promising options, not only for functional and somatoform disorders but also for PSS in well-  
44  
45 defined somatic diseases.<sup>19</sup> This suggests that generic, trans-diagnostic treatment  
46  
47 principles<sup>36</sup> may be valuable in addition to the disease-specific treatment of the underlying  
48  
49 pathophysiology. Across somatic diseases, a diverse array of psychological and social  
50  
51 factors needs to be considered on equal footing with biological factors in their roles as  
52  
53 potential risk factors, protective factors, and maintaining factors of PSS. Importantly,  
54  
55 psychological and social factors are not solely secondary reactions to persistent symptoms;  
56  
57 rather, they are deeply woven into the biopsychosocial processes that lead to PSS.  
58  
59  
60



To conclude, sufficient evidence warrants the assumption that aetiological mechanisms derived from research on somatoform and functional disorders also contribute to the persistence of symptoms in somatic diseases. However, the applicability of generic and specific risk factors and mechanisms of PSS across medical diseases has yet to be investigated.

Current aetiological knowledge on PSS: The aetiology of PSS across somatic diseases is not well understood. The unique way in which each individual perceives a somatic symptom and its severity, the expectation on how the symptom will evolve, and whether the treatment will be effective depends on the constellation of biological, psychological, and social factors. The comprehensive vulnerability-stress model by Henningsen et al.<sup>19</sup> defines predisposing, triggering, and maintaining/aggravating factors that determine the transition from short-term to persistent disabling symptoms. After extensively reviewing the literature for all targeted conditions included in the SOMACROSS research unit (RU), we developed a 'PSS working model' as a starting point for the investigation of disease-overarching generic and disease-specific risk factors and aetiological mechanisms (see **Figure 2**). The risk factors and aetiological mechanisms described below are considered most relevant to PSS:

#### Definitions: risk factors and aetiological mechanisms

'Risk factors' refer to variables associated with an increased risk of symptom persistence, although the relationship is not necessarily causal. 'Aetiological mechanisms' denote underlying mechanisms which are presumed to be causally involved in the persistence of symptoms.

- a. Predisposing factors for PSS include sociodemographic risk factors such as female gender,<sup>37</sup> poor education and socioeconomic status,<sup>3 38</sup> sociocultural factors,<sup>39</sup> psychological aspects such as early adverse life experiences,<sup>40-43</sup> personality factors like

1  
2  
3 neuroticism and negative affectivity,<sup>44</sup> biomedical factors such as prior medical  
4 diseases,<sup>44</sup> certain (epi)genetic profiles,<sup>45</sup> and immunological correlates of these factors.<sup>3</sup>

5  
6  
7 46 47  
8  
9

- 10  
11  
12 b. Triggering factors for short-term somatic symptoms include acute infections, injuries,  
13 medical or surgical procedures, or current life stressors.<sup>19 30</sup>  
14  
15  
16  
17  
18 c. Maintaining/aggravating factors: Most aetiological models on bodily complaints in  
19 somatoform and functional disorders<sup>48-50</sup> include the following core cognitive-perceptual  
20 and emotional mechanisms: selective attention towards interoceptive cues, amplified  
21 perception of bodily sensations, catastrophizing cognitive interpretations, somatosensory  
22 amplification,<sup>51</sup> and dysfunctional illness behaviours.<sup>19 46 52</sup> Affective factors such as  
23 alexithymia comprise deficits in the regulation of emotions.<sup>53</sup> On the level of  
24 dysfunctional behavioural processes, somatic symptoms are aggravated by learning  
25 processes, avoidance behaviour such as physical inactivity and subsequent  
26 deconditioning.<sup>54-56</sup> Further aggravating factors arise from unsatisfying encounters with  
27 the health care system, negative illness perceptions, and treatment experiences which  
28 result in the unnecessary and potentially harmful overuse of health care.<sup>19</sup> Social factors  
29 like work status, health literacy, access to medical care, stigmatisation, migration, and  
30 culture can be both predisposing and maintaining/aggravating factors of PSS.<sup>57</sup> Disease-  
31 specific biomedical factors (e.g., inflammation in inflammatory bowel disease) naturally  
32 influence the course of somatic symptom severity.<sup>58</sup> Additionally, disease-overarching  
33 psychobiological models postulate dysregulations of the endocrine, immune, and  
34 autonomic nervous systems as well as central sensitization to be potential links between  
35 psychosocial distress and PSS.<sup>48 59</sup> Other biopsychosocial interactions contributing to  
36 symptom persistence include treatment-related factors such as burdensome side effects  
37 of a treatment for an underlying disease. These side effects are difficult to disentangle  
38 from general bodily distress and likely to be influenced by nocebo effects through  
39  
40  
41  
42  
43  
44  
45  
46  
47  
48  
49  
50  
51  
52  
53  
54  
55  
56  
57  
58  
59  
60

1  
2  
3 patients' negative expectations and other psychological factors.<sup>60</sup> Central sensitization,  
4 defined as hyperexcitability of the central nervous system, has been suggested to  
5 contribute to the development and maintenance of chronic pain, while its role in other  
6 PSS is under debate.<sup>61 62</sup> Central sensitization is thought to be driven by  
7 neuroinflammation in the central and peripheral nervous system, as indicated by higher  
8 serum levels of interleukin 6 (IL-6) and tumour necrosis factor (TNF).<sup>61</sup> Recently,  
9 epigenetic modifications such as DNA methylation have been identified as potential  
10 contributors to altered resilience to environmental stress, pain, and somatic symptom  
11 burden.<sup>38 63</sup> Stool microbiota alterations are also hypothesized to be associated with the  
12 persistence of somatic symptoms. There is evidence of gut microbiota dysbiosis in  
13 patients with chronic fatigue and nonvisceral pain.<sup>64 65</sup>

- 14  
15  
16  
17  
18  
19  
20  
21  
22  
23  
24  
25  
26  
27  
28 d. Interactions of biopsychosocial factors: Recently, patients' expectations of symptoms  
29 have come into focus as having a central role in symptom processing and the relation  
30 between biological, psychosocial and treatment-related factors for persistent symptom  
31 development. Expectations are defined as future-directed cognitions regarding the  
32 anticipated course of symptoms.<sup>66</sup> As such, they constitute a common denominator of  
33 many psychological risk factors for PSS such as catastrophizing, illness perceptions and  
34 health anxiety. Thus, they can be regarded as a core feature of current aetiological  
35 models for PSS (e.g., somatosensory amplification).<sup>46</sup> Negative symptom expectations  
36 interact with actual somatic input and can fuel dysfunctional signal processing and the  
37 development of persistent symptoms. Relevantly, the power of expectations to predict  
38 symptom course, treatment benefit and negative treatment side effects has been  
39 demonstrated for a wide range of medical and psychological conditions, e.g., pain,  
40 rheumatoid arthritis, cancer, 'medically unexplained symptoms' and level of functioning  
41 after total hip and knee replacements.<sup>29 67-71</sup> Moreover, a growing body of research  
42 provides evidence that modifying expectations improves clinical outcomes.<sup>31 72 73</sup>

1  
2  
3 Expectations are also prominently conceptualized in emerging predictive processing  
4 models which suggest that symptom perception emerges through an integrative process  
5  
6 of sensory input, prior experience (leading to implicit expectations, or “priors”) and  
7  
8 contextual cues (such as affective state).<sup>74</sup> These models show that the relationship  
9  
10 between subjective symptoms and pathophysiological dysfunction is highly variable, both  
11  
12 between and within individuals, and that pathophysiological dysfunction may even be  
13  
14 completely absent in the presence of strong priors and ambiguous somatic input.  
15  
16 Depending on relative strength and precision, the actual symptom experience may be  
17  
18 more determined by somatic input or by priors.  
19  
20  
21  
22  
23

24 Altogether, the above mentioned risk factors and mechanisms of somatic symptom  
25  
26 persistence are less well studied in somatic diseases than in functional and somatoform  
27  
28 disorders.<sup>46</sup> We assume that – in addition to disease-specific pathophysiological mechanisms  
29  
30 – the processes underlying somatic symptom persistence in somatic diseases and in  
31  
32 functional/somatoform disorders involve similar risk factors and mechanisms, opening new  
33  
34 routes to modify symptom persistence in somatic diseases.  
35  
36  
37  
38

### 39 **Novelty and innovation**

40  
41 SOMACROSS takes on a fundamentally new perspective, by including two new ways of  
42  
43 thinking in medicine: First, the abandonment of the concept of medical inexplicability in the  
44  
45 diagnostic concepts of functional and somatoform disorders; and second, the shift away from  
46  
47 the idea that subjective suffering can essentially be explained by the extent of the underlying  
48  
49 physiological pathology. Assuming that biological markers alone do not sufficiently explain  
50  
51 aetiology and development of PSS, we will investigate the interaction of biological,  
52  
53 psychological and social factors regarding their contribution to subjective symptom severity  
54  
55 and symptom persistence in ten different medical conditions. In this way, SOMACROSS will  
56  
57 critically challenge the still prevalent dualistic mind-body disease model in medicine. The use  
58  
59 of a trans-symptomatic and trans-diagnostic approach will enable the identification of  
60

1  
2  
3 patterns, risk factors and aetiological mechanisms of symptom persistence across diseases  
4  
5 and syndromes.  
6  
7  
8

### 9 **Objectives of the overall project**

11 The superordinate aim of this interdisciplinary RU is to identify risk factors and mechanisms  
12 for the persistence of somatic symptoms across diseases, and thereby create a basis for  
13 evidence-based interventions for patients suffering from PSS.  
14  
15  
16  
17

18  
19  
20 The research objectives of SOMACROSS are:

- 21  
22 a. to identify generic (i.e., disease-overarching) biological, psychological, and social  
23 mechanisms contributing to the persistence of somatic symptoms across a range of  
24 medical diseases and syndromes;  
25  
26 b. to identify disease-specific mechanisms contributing to the persistence of somatic  
27 symptoms;  
28  
29 c. to formulate new, empirically testable hypotheses about the interaction of generic and  
30 disease-specific factors and to integrate the derived risk factors and mechanisms into  
31 comprehensive prediction models for PSS;  
32  
33 d. to derive generic and disease-specific clinically useful risk factors for symptom  
34 persistence;  
35  
36 e. to identify modifiable risk factors and mechanisms in the transition from acute to chronic  
37 symptoms; and,  
38  
39 f. to test whether the therapeutic optimisation of modifiable risk factors (e.g., dysfunctional  
40 symptom expectations) improves clinical outcomes.  
41  
42  
43  
44  
45  
46  
47  
48  
49  
50  
51

52  
53 The structural objectives of SOMACROSS are:

- 54  
55 a. to raise awareness for a highly relevant research field across medical disciplines;  
56  
57 b. to disseminate knowledge regarding the development and treatment of PSS;  
58  
59 c. to build a strong interdisciplinary research structure focused on PSS; and,  
60

1  
2  
3 d. to establish qualifications of the next generation of scientific experts in this field.  
4  
5  
6

### 7 **Working hypotheses of the overall project**

9 Hypothesis 1: In all syndromes and diseases examined in SOMACROSS, biological,  
10 psychological and social factors contribute to the persistence of somatic symptoms individually  
11 or/and in interplay.  
12  
13

14  
15 Hypothesis 2: Persistence of somatic symptoms is predicted by common risk factors across  
16 syndromes and diseases.  
17

18  
19 Hypothesis 3: Generic and syndrome- and/or disease-specific risk scores accurately predict  
20 the risk of persistence of somatic symptoms.  
21  
22

23  
24 Hypothesis 4: Expectations play a relevant role in the development of persistent somatic  
25 symptoms. Thus, the modification of dysfunctional expectations constitutes a promising  
26 starting point for interventions to improve symptom severity in PSS.  
27  
28  
29

## 30 31 32 33 34 **METHODS AND ANALYSIS**

### 35 **Design**

36  
37 Investigated symptoms and composition of SOMACROSS: To ensure clinical relevance,  
38 symptoms with high prevalence in medical settings were chosen, i.e., fatigue, gastrointestinal  
39 symptoms, pruritus, and multiple co-existing symptoms.<sup>75</sup> To detect patterns, similarities, and  
40 discrepancies in symptom persistence across a range of medical conditions, syndromes  
41 typically classified as somatic (e.g., primary biliary cholangitis, ulcerative colitis) and  
42 syndromes considered as 'functional' or 'somatoform' (e.g., irritable bowel syndrome,  
43 somatic symptom disorder) were included. The seven projects of SOMACROSS including  
44 content and project leaders are listed in **Table 1**.  
45  
46  
47  
48  
49  
50  
51  
52  
53  
54

55  
56  
57  
58 *Please insert **Table 1** approximately here*  
59  
60

1  
2  
3 Each project will investigate specific predisposing, triggering, maintaining or aggravating  
4 factors for PSS based on the current state of knowledge in the respective disease or  
5 syndrome. Based on our extensive literature review, we compiled a 'PSS working model'  
6  
7  
8 (**Figure 2**), which serves as a starting point for rigorous testing of distinct factors with regard  
9  
10 to their relevance for symptom persistence across all projects. These factors are assessed  
11  
12 by the joint core set of measures (see below) that will be used across all projects. Other  
13  
14 predictor variables, which are considered specific for defined diseases or syndromes only,  
15  
16 will be tested in the respective individual projects. Of note, the classification of variables as  
17  
18 predisposing, triggering, maintaining, and aggravating factors is preliminary and not always  
19  
20 distinct.  
21  
22  
23  
24  
25

26 *Please insert **Figure 2** approximately here*

27  
28  
29

30 Study designs and methodological approaches: The initial state of knowledge varies between  
31  
32 the individual projects and health conditions. For some diseases, there is cross-sectional  
33  
34 evidence on associations between symptom persistence and specific biopsychosocial  
35  
36 variables. For others, longitudinal studies have identified relevant predictors for symptom  
37  
38 maintenance. These different starting points in terms of current knowledge lead to different  
39  
40 research aims (**Figure 3**). In an envisaged second phase, all projects will take a step towards  
41  
42 modification of the relevant factors based on their individual project results.  
43  
44  
45  
46  
47

48 *Please insert **Figure 3** approximately here*

49  
50

51 Shared inclusion and exclusion criteria: All projects share common basic inclusion criteria,  
52  
53 i.e.: age  $\geq 18$  years, sufficient oral and written German language proficiency, and written  
54  
55 informed consent. Common exclusion criteria include: serious illness requiring immediate  
56  
57 intervention; florid psychosis or substance abuse disorder, and acute suicidality. In addition  
58  
59  
60

1  
2  
3 to these common criteria, the individual projects defined project-specific inclusion and  
4  
5 exclusion criteria.  
6  
7  
8

9 Shared assessment points: In order to compare results across projects, all projects (P) with  
10  
11 prospective study designs (P1-5) will use identical assessment points, i.e., baseline, 6-, and  
12  
13 12-month follow-up. These enable the statistical evaluation of generic predictors across  
14  
15 diseases and the pooling of data.  
16  
17

18  
19  
20 Patient and public involvement: Involvement of patients or members of the public varies  
21  
22 among the projects of the research unit and is therefore described in detail in the study  
23  
24 protocols of the individual projects.  
25  
26  
27

## 28 **Measures**

29  
30 Shared outcome measures: Severity of somatic symptoms is the primary outcome for all  
31  
32 projects (**Table 2**). Given that a) somatic symptom severity must be specifically assessed for  
33  
34 each symptom, and that b) generic instruments are needed to conduct comparisons and joint  
35  
36 evaluations across projects, somatic symptoms are measured in two ways:  
37  
38

- 39 a. Symptom-specific assessment, using specific measures of somatic symptom severity,
- 40  
41 b. Generic assessment of overall symptom severity, using the internationally well-  
42  
43 established Patient Health Questionnaire-15 (PHQ-15)<sup>76 77</sup> and the Numeric Rating Scale  
44  
45 for symptom intensity as recommended by the EURONET-SOMA group<sup>78</sup>.  
46

47 Additional shared secondary outcomes include symptom interference, disability, and quality  
48  
49 of life.  
50  
51

52  
53 Joint psychosocial core instruments: The list of joint core instruments of SOMACROSS  
54  
55 (**Table 2**) reflects the factors displayed in the PSS working model (**Figure 2**). All joint core  
56  
57 instruments were chosen after considering construct relevance, reliability, validity, feasibility,  
58  
59 acceptability, availability in German and statistical constraints. In order to assess the  
60



1  
2  
3 comorbidity with DSM-5 somatic symptom disorder in all the diseases investigated, the  
4 relevant section of a German research version of the Structured Diagnostic Interview for  
5 Mental Disorders (SCID-5) will be conducted.<sup>79 80</sup>  
6  
7  
8  
9

10  
11 *Please insert **Table 2** approximately here*  
12  
13  
14

15 Joint biomedical factors: In addition to the joint core set of instruments, the various projects  
16 of SOMACROSS investigate further common variables with regard to their relevance for  
17 PSS. Disease overarching factors such as duration and subjective severity of disease, (prior  
18 biomedical disease and comorbidities, and side effects and subjective treatment experiences  
19 will be assessed as potential generic predictors of symptom persistence across all projects.  
20 Serum levels of C-reactive protein (CRP), interleukin 6 (IL-6) and tumour necrosis factor  
21 (TNF) will be measured at baseline as systemic biomarkers of central sensitization<sup>81</sup> to shed  
22 light on the controversial role of central sensitization in the persistence of somatic symptoms  
23 both prospectively and in a cross-sectional view across P1 to P5. The contribution of  
24 epigenetic mechanisms (altered DNA methylation in an epigenome-wide association study)  
25 in the course from acute to persistent symptoms in kidney disease will be analysed in P3.  
26 Additionally, epigenetic mechanisms will be analysed and cross-validated in pilot samples  
27 across P1 to P5 (n=20 patients per diagnosis, n=10 with low vs. high baseline symptom  
28 burden according to the PHQ-15), led by P3. We will also investigate the role of microbiome  
29 alterations for fatigue persistence among patients with primary biliary cholangitis and patients  
30 with primary sclerosing cholangitis (P1). In P2 and P3 we will collect stool samples from  
31 participants at baseline (P2 also post-intervention). Depending on the results regarding the  
32 course of PSS (P2 and P3) and the response to the intervention (P2), we will then analyse  
33 the microbiome (metagenomic sequencing). We believe that the above-mentioned  
34 biomedical factors are potentially relevant across several symptoms and diseases. Further  
35 disease-specific biomedical predictors such as disease stage and disease-specific markers  
36  
37  
38  
39  
40  
41  
42  
43  
44  
45  
46  
47  
48  
49  
50  
51  
52  
53  
54  
55  
56  
57  
58  
59  
60

1  
2  
3 of symptom persistence will be assessed within the individual projects, using appropriate  
4 methodology.  
5  
6  
7  
8

### 9 **Statistical evaluation**

10 Joint statistical evaluation strategy: The use of shared measures and assessment points  
11 across P1 to P6 enables collective statistical analyses (n=1,328 participants; *not* included are  
12 the n=2,432 participants from the cross-sectional analysis in P6 and the n=156 participants  
13 of the intervention groups in P2). The power calculations were performed individually for  
14 each project and are included in the projects' study protocols. The joint cross-project  
15 evaluation will allow us to develop an overarching conceptual model for the persistence of  
16 somatic symptoms. We will test paths and associations between the key factors of the  
17 working model by using an exploratory approach and initial hypotheses testing. Given  
18 scarcity of data on PSS for most of our included diseases and syndromes, we included a  
19 large number of variables in the first funding phase. This will enable us to generate new  
20 hypotheses for rigorous testing in the second funding phase. P1 and P3 will use multi-  
21 method approaches by embedding qualitative and experimental studies. Both approaches  
22 represent a valuable possibility for an in-depth exploration of mechanisms of symptom  
23 perception, development and maintenance. The statistical evaluation across projects will be  
24 carried out by biostatistics experts using a structural equation model approach. The statistical  
25 analyses will also lead to a reduction in predictors of symptom persistence by removing  
26 irrelevant pathways, which will allow more distinct analyses in subsequent studies.  
27  
28 Depending on the existing evidence for each condition, some of the projects follow a  
29 hypothesis-generating design while others perform confirmatory tests based on prior  
30 research (see also **Figure 3**). In exploratory analyses, we do not adjust for multiple testing in  
31 order to avoid the loss of power. However, we formulated testable, pre-specified initial  
32 hypotheses for each project as starting points, which contribute to the overarching  
33 hypotheses of the Z-Project. Statistical methods to adjust for multiple testing will be applied  
34 for the confirmatory analyses.  
35  
36  
37  
38  
39  
40  
41  
42  
43  
44  
45  
46  
47  
48  
49  
50  
51  
52  
53  
54  
55  
56  
57  
58  
59  
60

## ETHICS AND DISSEMINATION

Ethical approval: All studies including patients (P1 to P6) were approved by the respective Ethics Committees of the Medical Associations Hamburg and Westphalia-Lippe / Westphalian Wilhelms University, Münster, Germany. The individual studies will be conducted in accordance with the WMA Declaration of Helsinki, guidelines for Good Clinical Practice, national and local laws. Eligible patients will be informed about the study verbally and in written form before providing written informed consent.

Data sharing: De-identified individual patient data will be made publicly available. The times and the conditions of the availability of data will be in accordance with the 'Recommendations for Sharing Clinical Trial Data' of the Institute of Medicine (IOM). Data sharing will follow the *FAIR* Data Principles (Findable, Accessible, Interoperable and Reusable) and international naming conventions (e.g., Systematized Nomenclature of Medicine) to maximize transparency and scientific reproducibility. The main findings of each project will be published in peer-reviewed journals and made publicly available. In addition, we will communicate scientific results in lay language via press releases, social media, and patient forums.

Impact and relevance: Regarding the impact on the research field of PSS, SOMACROSS will provide the urgently needed infrastructure to facilitate collaboration and knowledge exchange between medical disciplines. The research field of PSS will benefit from the measurement of larger sets of predisposing, triggering, and maintaining biopsychosocial variables, and from additional theoretical work on their interrelation. By providing information to the public, e.g., at a 'patient day' and the SOMACROSS webpage, we hope to improve the understanding of PSS, avoid unnecessary and potentially harming medical procedures and provide reliable information for patients' personalised decision-making. Greater awareness and

1  
2  
3 understanding of PSS in society might also lead to reduced stigma associated with PSS.  
4  
5 SOMACROSS aims to open science to young researchers with innovative ideas, provide  
6  
7 researchers with flexible career opportunities, and improve the way in which research is  
8  
9 conducted. The most important measures of SOMACROSS are summarized in **Figure 4**.

10  
11  
12  
13  
14 *Please insert **Figure 4** approximately here*  
15  
16

## 17 **Conclusion**

18  
19  
20 Our patient-centred focus on subjectively distressing somatic symptoms has the potential to  
21  
22 enable increased visibility of somatic symptom burden across different medical specialties.  
23  
24 SOMACROSS will enhance the relevance of each individual project by integrating knowledge  
25  
26 about individual risk factors and mechanisms of PSS into joint analyses and publications.  
27  
28 While we also anticipate challenges regarding comparability, transferability, and complexity  
29  
30 of such a translational approach, we expect to gain insights on PSS that could not be  
31  
32 reached without this collaboration. Our results will inform the development of mechanism-  
33  
34 based tailored interventions, and in the long term, SOMACROSS will enable the translation  
35  
36 of cutting-edge scientific knowledge into clinical practice by providing clinicians with  
37  
38 evidence-based prevention and treatment options.  
39  
40  
41  
42  
43  
44  
45  
46  
47  
48  
49  
50  
51  
52  
53  
54  
55  
56  
57  
58  
59  
60

## Acknowledgements

We would like to thank Professor Dr. Paul Enck, PhD, University Hospital, Tübingen, Germany, Professor Dr. Peter Henningsen, MD, Technical University Hospital, Munich, Germany, Professor Dr. Uwe Koch-Gromus, MD, PhD, University Medical Centre Hamburg-Eppendorf, Germany, and Professor Dr. Judith Rosmalen, PhD, University Medical Centre Groningen, the Netherlands for their continuous and extremely helpful support during the application process for the SOMACROSS research unit. We are also very grateful to Professor Simone Kühn, PhD and Professor Jürgen Gallinat, MD, University Medical Centre Hamburg-Eppendorf, Germany, for their valuable contributions to previous versions of the SOMACROSS research proposal. Finally, we would like to thank Dr. Kerstin Maehder, PhD, for her critical review of this study protocol.

## Author contributions

Bernd Löwe is the speaker of the SOMACROSS research unit. Omer Van den Bergh is a Mercator Fellow of this research unit. Viola Andresen, Tobias B. Huber, Olaf von dem Knesebeck, Bernd Löwe, Ansgar W. Lohse, Yvonne Nestoriuc, Gudrun Schneider, Stefan W. Schneider, Christoph Schramm, Meike Shedden-Mora, Sonja Ständer, Anne Toussaint, and Antonia Zapf lead the individual SOMACROSS projects. Antonia Zapf and Eik Vettorazzi provide statistical expertise to all projects of the research unit. Bernd Löwe drafted the first version of the protocol, Meike Shedden Mora and Anne Toussaint contributed individual parts of the protocol. All authors, i.e., Viola Andresen, Omer Van den Bergh, Tobias B. Huber, Olaf von dem Knesebeck, Bernd Löwe, Ansgar W. Lohse, Yvonne Nestoriuc, Gudrun Schneider, Stefan W. Schneider, Christoph Schramm, Meike Shedden-Mora, Sonja Ständer, Anne Toussaint, Eik Vettorazzi, and Antonia Zapf, contributed to the refinement of the study protocol, read and approved the final version.

**Funding:**

The Research Unit 5211 (RU 5211) »*Persistent SOMAtic Symptoms ACROSS Diseases: From Risk Factors to Modification (SOMACROSS)*«, is funded by the German Research Foundation (Deutsche Forschungsgemeinschaft, DFG). The DFG project number for the coordination project is 445297796 (speaker: Professor Bernd Löwe, MD); see also <https://gepris.dfg.de/gepris/projekt/445297796>. The funding source had no role in the design of this study and will not have any role during its execution, analyses, interpretation of the data, or decision to submit results.

**Competing interests**

None

## REFERENCES

1. Kohlmann S, Gierk B, Hummelgen M, et al. Somatic symptoms in patients with coronary heart disease: prevalence, risk factors, and quality of life. *JAMA Intern Med* 2013;173:1469-71.
2. Löwe B, Spitzer RL, Williams JB, et al. Depression, anxiety and somatization in primary care: syndrome overlap and functional impairment. *Gen Hosp Psychiatry* 2008;30:191-99.
3. Henningsen P, Gündel H, Kop WJ, et al. Persistent Physical Symptoms as Perceptual Dysregulation: A Neuropsychobehavioral Model and Its Clinical Implications. *Psychosom Med* 2018;80:422-31.
4. Klaus K, Rief W, Brähler E, et al. The distinction between "medically unexplained" and "medically explained" in the context of somatoform disorders. *Int J Behav Med* 2013;20:161-71.
5. Joustra ML, Janssens KA, Bultmann U, et al. Functional limitations in functional somatic syndromes and well-defined medical diseases. Results from the general population cohort LifeLines. *J Psychosom Res* 2015;79:94-9.
6. Kohlmann S, Gierk B, Murray AM, et al. Base Rates of Depressive Symptoms in Patients with Coronary Heart Disease: An Individual Symptom Analysis. *PLoS One* 2016;11:e0156167.
7. Kroenke K, Zhong X, Theobald D, et al. Somatic symptoms in patients with cancer experiencing pain or depression: prevalence, disability, and health care use. *Arch Intern Med* 2010;170:1686-94.
8. Kroenke K. A practical and evidence-based approach to common symptoms: a narrative review. *Ann Intern Med* 2014;161:579-86.
9. World Health Organization (WHO). International Classification of Disease, ICD-11 2020 [Available from: <https://icd.who.int/en2019>].
10. Hinz A, Ernst J, Glaesmer H, et al. Frequency of somatic symptoms in the general population: Normative values for the Patient Health Questionnaire-15 (PHQ-15). *J Psychosom Res* 2017;96:27-31.
11. Kroenke K. Patients presenting with somatic complaints: epidemiology, psychiatric comorbidity and management. *Int J Methods Psychiatr Res* 2003;12:34-43.
12. Acevedo-Mesa A, Tendeiro JN, Roest A, et al. Improving the Measurement of Functional Somatic Symptoms With Item Response Theory. *Assessment* 2020:1073191120947153.
13. Steinbrecher N, Koerber S, Frieser D, et al. The prevalence of medically unexplained symptoms in primary care. *Psychosomatics* 2011;52:263-71.

14. Schappert SM, Rechtsteiner EA. Ambulatory medical care utilization estimates for 2007. *Vital and health statistics Series 13, Data from the National Health Survey* 2011;1-38.
15. Wiborg JF, Gieseler D, Fabisch AB, et al. Suicidality in primary care patients with somatoform disorders. *Psychosom Med* 2013;75:800-06.
16. Jordan P, Shedden-Mora MC, Löwe B. Predicting suicidal ideation in primary care: An approach to identify easily assessable key variables. *Gen Hosp Psychiatry* 2018;51:106-11.
17. Konnopka A, Kaufmann C, König HH, et al. Association of costs with somatic symptom severity in patients with medically unexplained symptoms. *J Psychosom Res* 2013;75:370-5.
18. Wortman MSH, Lokkerbol J, van der Wouden JC, et al. Cost-effectiveness of interventions for medically unexplained symptoms: A systematic review. *PLoS One* 2018;13:e0205278.
19. Henningsen P, Zipfel S, Sattel H, et al. Management of Functional Somatic Syndromes and Bodily Distress. *Psychother Psychosom* 2018;87:12-31.
20. Aaron LA, Buchwald D. A review of the evidence for overlap among unexplained clinical conditions. *Ann Intern Med* 2001;134:868-81.
21. Burton C, Fink P, Henningsen P, et al. Functional somatic disorders: discussion paper for a new common classification for research and clinical use. *BMC medicine* 2020;18:34-34.
22. American Psychiatric Association (APA). Diagnostic and Statistical Manual of Mental Disorders, 4th ed. (DSM-IV). Washington DC: American Psychiatric Association 1994.
23. Dilling H, Mombour W, Schmidt M. Weltgesundheitsorganisation: Internationale Klassifikation psychischer Störungen. ICD-10 Kapitel V (F). Klinisch-diagnostische Leitlinien. 3. Auflage. Bern, Swiss: Huber 1999.
24. Picariello F, Ali S, Moss-Morris R, et al. The most popular terms for medically unexplained symptoms: the views of CFS patients. *J Psychosom Res* 2015;78:420-6.
25. Marks EM, Hunter MS. Medically Unexplained Symptoms: an acceptable term? *British journal of pain* 2015;9:109-14.
26. American Psychiatric Association (APA). Diagnostic and Statistical Manual of Mental Disorders, Fifth Edition (DSM-5). Arlington, VA: American Psychiatric Association 2013.
27. Dimsdale JE, Creed F, Escobar J, et al. Somatic symptom disorder: an important change in DSM. *J Psychosom Res* 2013;75:223-8.
28. Juergens MC, Seekatz B, Moosdorf RG, et al. Illness beliefs before cardiac surgery predict disability, quality of life, and depression 3 months later. *J Psychosom Res* 2010;68:553-60.



- 1  
2  
3 29. Nestoriuc Y, von Blanckenburg P, Schuricht F, et al. Is it best to expect the worst? Influence of  
4 patients' side-effect expectations on endocrine treatment outcome in a 2-year prospective clinical  
5 cohort study. *Ann Oncol* 2016;27:1909-15.  
6  
7  
8  
9 30. Löwe B, Lohse A, Andresen V, et al. The Development of Irritable Bowel Syndrome: A Prospective  
10 Community-Based Cohort Study. *Am J Gastroenterol* 2016;111:1320-9.  
11  
12  
13 31. Rief W, Shedden-Mora MC, Laferton JA, et al. Preoperative optimization of patient expectations  
14 improves long-term outcome in heart surgery patients: results of the randomized controlled PSY-  
15 HEART trial. *BMC Medicine* 2017;15:4.  
16  
17  
18 32. Brown SA, Tyrer FC, Clarke AL, et al. Symptom burden in patients with chronic kidney disease not  
19 requiring renal replacement therapy. *Clinical Kidney Journal* 2017;10:788-96.  
20  
21  
22 33. Almutary H, Bonner A, Douglas C. Symptom burden in chronic kidney disease: a review of recent  
23 literature. *Journal of renal care* 2013;39:140-50.  
24  
25  
26 34. Griffiths L, Jones DE. Pathogenesis of primary biliary cirrhosis and its fatigue. *Dig Dis*  
27  
28 2014;32:615-25.  
29  
30 35. Kumar S, Joshi R, Joge V. Do clinical symptoms and signs predict reduced renal function among  
31 hospitalized adults? *Annals of medical and health sciences research* 2013;3:492-7.  
32  
33  
34 36. Chalder T, Patel M, James K, et al. Persistent physical symptoms reduction intervention: a system  
35 change and evaluation in secondary care (PRINCE secondary) - a CBT-based transdiagnostic  
36 approach: study protocol for a randomised controlled trial. *BMC Psychiatry* 2019;19:307.  
37  
38  
39 37. Ballering AV, Bonvanie IJ, Olde Hartman TC, et al. Gender and sex independently associate with  
40 common somatic symptoms and lifetime prevalence of chronic disease. *Soc Sci Med*  
41  
42 2020;253:112968.  
43  
44  
45 38. Borsook D, Youssef AM, Simons L, et al. When pain gets stuck: the evolution of pain chronification  
46 and treatment resistance. *Pain* 2018;159:2421-36.  
47  
48  
49 39. Kirmayer LJ, Sartorius N. Cultural models and somatic syndromes. *Psychosom Med* 2007;69:832-  
50  
51 40.  
52  
53 40. Afari N, Ahumada SM, Wright LJ, et al. Psychological trauma and functional somatic syndromes: a  
54 systematic review and meta-analysis. *Psychosom Med* 2014;76:2-11.  
55  
56  
57 41. Karatzias T, Howard R, Power K, et al. Organic vs. functional neurological disorders: The role of  
58 childhood psychological trauma. *Child Abuse Negl* 2017;63:1-6.  
59  
60

- 1  
2  
3 42. Borsini A, Heggul N, Mondelli V, et al. Childhood stressors in the development of fatigue  
4 syndromes: a review of the past 20 years of research. *Psychol Med* 2014;44:1809-23.  
5  
6  
7 43. Herzog JI, Schmahl C. Adverse Childhood Experiences and the Consequences on  
8 Neurobiological, Psychosocial, and Somatic Conditions Across the Lifespan. *Front Psychiat*  
9 2018;9:420.  
10  
11  
12 44. Claassen-van Dessel N, van der Wouden JC, Hoekstra T, et al. The 2-year course of Medically  
13 Unexplained Physical Symptoms (MUPS) in terms of symptom severity and functional status:  
14 results of the PROSPECTS cohort study. *J Psychosom Res* 2018;104:76-87.  
15  
16  
17 45. Gillespie NA, Zhu G, Heath AC, et al. The genetic aetiology of somatic distress. *Psychol Med*  
18 2000;30:1051-61.  
19  
20  
21 46. Rief W, Martin A. How to use the new DSM-5 somatic symptom disorder diagnosis in research and  
22 practice: a critical evaluation and a proposal for modifications. *Annu Rev Clin Psychol*  
23 2014;10:339-67.  
24  
25  
26 47. Deary V, Chalder T, Sharpe M. The cognitive behavioural model of medically unexplained  
27 symptoms: a theoretical and empirical review. *Clin Psychol Rev* 2007;27:781-97.  
28  
29  
30 48. Rief W, Barsky AJ. Psychobiological perspectives on somatoform disorders.  
31 *Psychoneuroendocrinology* 2005;30:996-1002.  
32  
33  
34 49. Brown RJ. Psychological mechanisms of medically unexplained symptoms: an integrative  
35 conceptual model. *Psychol Bull* 2004;130:793-812.  
36  
37  
38 50. Rief W, Broadbent E. Explaining medically unexplained symptoms-models and mechanisms. *Clin*  
39 *Psychol Rev* 2007;27:821-41.  
40  
41  
42 51. Barsky AJ, Wyshak G. Hypochondriasis and somatosensory amplification. *Br J Psychiatry*  
43 1990;157:404-9.  
44  
45  
46 52. Boersma K, Linton SJ. How does persistent pain develop? An analysis of the relationship between  
47 psychological variables, pain and function across stages of chronicity. *Behav Res Ther*  
48 2005;43:1495-507.  
49  
50  
51 53. De Gucht V, Heiser W. Alexithymia and somatisation: quantitative review of the literature. *J*  
52 *Psychosom Res* 2003;54:425-34.  
53  
54  
55 54. Picavet HS, Vlaeyen JW, Schouten JS. Pain catastrophizing and kinesiophobia: predictors of  
56 chronic low back pain. *Am J Epidemiol* 2002;156:1028-34.  
57  
58  
59 55. Vlaeyen JW, Crombez G, Linton SJ. The fear-avoidance model of pain. *Pain* 2016;157:1588-9.  
60

- 1  
2  
3 56. Boersma K, Linton S, Overmeer T, et al. Lowering fear-avoidance and enhancing function through  
4 exposure in vivo. A multiple baseline study across six patients with back pain. *Pain* 2004;108:8-  
5 16.  
6  
7  
8  
9 57. Löwe B, Gerloff C. Functional Somatic Symptoms Across Cultures: Perceptual and Health Care  
10 Issues. *Psychosom Med* 2018;80:412-15.  
11  
12 58. Peters EM. Stressed skin?--a molecular psychosomatic update on stress-causes and effects in  
13 dermatologic diseases. *Journal der Deutschen Dermatologischen Gesellschaft = Journal of the*  
14 *German Society of Dermatology: JDDG* 2016;14:233-52; quiz 53.  
15  
16  
17 59. van Ravenzwaaij J, Olde Hartman T, van Ravesteijn H, et al. Explanatory models of medically  
18 unexplained symptoms: a qualitative analysis of the literature. *Mental health in family medicine*  
19 2010;7:223-31.  
20  
21  
22 60. Barsky AJ, Saintfort R, Rogers MP, et al. Nonspecific medication side effects and the nocebo  
23 phenomenon. *JAMA* 2002;287:622-7.  
24  
25  
26 61. Heim C, Ehlert U, Hellhammer DH. The potential role of hypocortisolism in the pathophysiology of  
27 stress-related bodily disorders. *Psychoneuroendocrinology* 2000;25:1-35.  
28  
29  
30 62. Bjurstrom MF, Giron SE, Griffis CA. Cerebrospinal Fluid Cytokines and Neurotrophic Factors in  
31 Human Chronic Pain Populations: A Comprehensive Review. *Pain practice: the official journal of*  
32 *World Institute of Pain* 2016;16:183-203.  
33  
34  
35 63. van den Broeke EN. Central sensitization and pain hypersensitivity: Some critical considerations.  
36 *F1000Research* 2018;7:1325.  
37  
38  
39 64. Nagy-Szakal D, Williams BL, Mishra N, et al. Fecal metagenomic profiles in subgroups of patients  
40 with myalgic encephalomyelitis/chronic fatigue syndrome. *Microbiome* 2017;5:44.  
41  
42  
43 65. Minerbi A, Gonzalez E, Brereton NJB, et al. Altered microbiome composition in individuals with  
44 fibromyalgia. *Pain* 2019;160:2589-602.  
45  
46  
47 66. Laferton JA, Kube T, Salzmann S, et al. Patients' Expectations Regarding Medical Treatment: A  
48 Critical Review of Concepts and Their Assessment. *Front Psychol* 2017;8:233.  
49  
50  
51 67. Petrie KJ, Rief W. Psychobiological Mechanisms of Placebo and Nocebo Effects: Pathways to  
52 Improve Treatments and Reduce Side Effects. *Annual review of psychology* 2019;70:599-625.  
53  
54  
55 68. Enck P, Bingel U, Schedlowski M, et al. The placebo response in medicine: minimize, maximize or  
56 personalize? *Nature Reviews Drug discovery* 2013;12:191-204.  
57  
58  
59  
60

- 1  
2  
3 69. Vase L, Vollert J, Finnerup NB, et al. Predictors of the placebo analgesia response in randomized  
4 controlled trials of chronic pain: a meta-analysis of the individual data from nine industrially  
5 sponsored trials. *Pain* 2015;156:1795-802.  
6  
7  
8 70. Goffaux P, de Souza JB, Potvin S, et al. Pain relief through expectation supersedes descending  
9 inhibitory deficits in fibromyalgia patients. *Pain* 2009;145:18-23.  
10  
11 71. Nestoriuc Y, Orav EJ, Liang MH, et al. Prediction of nonspecific side effects in rheumatoid arthritis  
12 patients by beliefs about medicines. *Arthritis Care & Research* 2010;62:791-9.  
13  
14 72. Schmitz J, Müller M, Stork J, et al. Positive Treatment Expectancies Reduce Clinical Pain and  
15 Perceived Limitations in Movement Ability Despite Increased Experimental Pain: A Randomized  
16 Controlled Trial on Sham Opioid Infusion in Patients with Chronic Back Pain. *Psychother  
17 Psychosom* 2019;88:203-14.  
18  
19 73. Kube T, Glombiewski JA, Rief W. Using different expectation mechanisms to optimize treatment of  
20 patients with medical conditions: A systematic review. *Psychosom Med* 2018;80:535-43.  
21  
22 74. Ongaro G, Kaptchuk TJ. Symptom perception, placebo effects, and the Bayesian brain. *Pain*  
23 2019;160:1-4.  
24  
25 75. Laux G, Rosemann T, Korner T, et al. Detailed data collection regarding the utilization of medical  
26 services, morbidity, course of illness and outcomes by episode-based documentation in general  
27 practices within the CONTENT project. *Gesundheitswesen* 2007;69:284-91.  
28  
29 76. Kroenke K, Spitzer RL, Williams JB. The PHQ-15: Validity of a new measure for evaluating the  
30 severity of somatic symptoms. *Psychosom Med* 2002;64:258-66.  
31  
32 77. Kroenke K, Spitzer RL, Williams JB, et al. The Patient Health Questionnaire somatic, anxiety, and  
33 depressive symptom scales: a systematic review. *Gen Hosp Psychiatry* 2010;32:345-59.  
34  
35 78. Rief W, Burton C, Frosthalm L, et al. Core Outcome Domains for Clinical Trials on Somatic  
36 Symptom Disorder, Bodily Distress Disorder, and Functional Somatic Syndromes: European  
37 Network on Somatic Symptom Disorders Recommendations. *Psychosom Med* 2017;79:1008-15.  
38  
39 79. Toussaint A, Hüsing P, Kohlmann S, et al. Detecting DSM-5 somatic symptom disorder: criterion  
40 validity of the Patient Health Questionnaire-15 (PHQ-15) and the Somatic Symptom Scale-8  
41 (SSS-8) in combination with the Somatic Symptom Disorder - B Criteria Scale (SSD-12). *Psychol  
42 Med* 2019:1-10.  
43  
44 80. Toussaint A, Murray AM, Voigt K, et al. Development and Validation of the Somatic Symptom  
45 Disorder-B Criteria Scale (SSD-12). *Psychosom Med* 2016;78:5-12.  
46  
47  
48  
49  
50  
51  
52  
53  
54  
55  
56  
57  
58  
59  
60

1  
2  
3 81. Ji RR, Nackley A, Huh Y, et al. Neuroinflammation and Central Sensitization  
4  
5  
6  
7  
8  
9  
10  
11  
12  
13  
14  
15  
16  
17  
18  
19  
20  
21  
22  
23  
24  
25  
26  
27  
28  
29  
30  
31  
32  
33  
34  
35  
36  
37  
38  
39  
40  
41  
42  
43  
44  
45  
46  
47  
48  
49  
50  
51  
52  
53  
54  
55  
56  
57  
58  
59  
60

For peer review only

**Table 1:** Individual projects and project leaders of the SOMACROSS research unit

| Project No.                                                                                           | Project title                                                                                                                  | Project content                                                                                                                                                                                                                                                               | Project leader(s)                     | Institution(s)                                                                                                |
|-------------------------------------------------------------------------------------------------------|--------------------------------------------------------------------------------------------------------------------------------|-------------------------------------------------------------------------------------------------------------------------------------------------------------------------------------------------------------------------------------------------------------------------------|---------------------------------------|---------------------------------------------------------------------------------------------------------------|
|  <b>P1</b>           | Fatigue in Primary Biliary Cholangitis: Factors Associated With Severity and Persistence as Future Therapeutic Targets         | P1 examines the disease-specific biological and generic psychosocial factors which contribute to fatigue in patients with primary biliary cholangitis and primary sclerosing cholangitis and aims to determine its course over time.                                          | Dr. Anne Toussaint, PhD               | Department of Psychosomatic Medicine and Psychotherapy, UKE                                                   |
|                                                                                                       |                                                                                                                                |                                                                                                                                                                                                                                                                               | Prof. Dr. Christoph Schramm, MD       | Martin Zeitz Centre for Rare Diseases and I. Department of Medicine, UKE                                      |
|  <b>P2*</b>          | Persistence of Gastrointestinal Symptoms in Irritable Bowel Syndrome and Ulcerative Colitis: From Risk Factors to Modification | P2 investigates whether somatic symptoms in patients with irritable bowel syndrome and ulcerative colitis are influenced by illness anxiety and symptom expectations and could therefore be improved by expectation management.                                               | Prof. Dr. Bernd Löwe, MD              | Department of Psychosomatic Medicine and Psychotherapy, UKE                                                   |
|                                                                                                       |                                                                                                                                |                                                                                                                                                                                                                                                                               | Prof. Dr. Ansgar W. Lohse, MD         | I. Department of Medicine, UKE                                                                                |
|  <b>P3</b>           | Predictors of Somatic Symptom Persistence in Patients With Chronic Kidney Disease                                              | P3 aims to identify multivariate predictors of PSS in patients with pre-dialysis chronic kidney disease (CKD) by testing biomedical, psychological, and treatment-related predictors using a mixed methods cohort study.                                                      | Prof. Dr. Meike Shedden Mora, PhD     | Department of Psychosomatic Medicine and Psychotherapy, UKE, Department of Psychology, Medical School Hamburg |
|                                                                                                       |                                                                                                                                |                                                                                                                                                                                                                                                                               | Prof. Dr. Tobias B. Huber, MD         | III. Department of Medicine, UKE                                                                              |
|  <b>P4</b>           | Biological and Psychosocial Factors Affecting the Persistence of Pruritus Symptoms                                             | P4 examines the interplay of psychosocial and biological factors affecting the maintenance of pruritus in patients with atopic dermatitis, patients with pruritus on non-lesional skin, and healthy controls.                                                                 | Prof. Dr. Stefan W. Schneider, MD     | Department of Dermatology and Venerology, UKE                                                                 |
|                                                                                                       |                                                                                                                                |                                                                                                                                                                                                                                                                               | Prof. Dr. Dr. Sonja Ständer, MD       | Department of Dermatology, University of Münster                                                              |
|                                                                                                       |                                                                                                                                |                                                                                                                                                                                                                                                                               | Prof. Dr. Gudrun Schneider, ND        | Department of Psychosomatic Medicine and Psychotherapy, University of Münster                                 |
|  <b>P5*</b>        | Modifiable Factors for Somatic Symptom Persistence in Patients With Somatic Symptom Disorder                                   | P5 examines whether expectations about symptom severity and coping with symptoms determine symptom persistence in patients with somatic symptom disorder in interaction with somatic comorbidity and psychosocial factors.                                                    | Prof. Dr. Yvonne Nestoriuc, PhD       | Department of Clinical Psychology, Helmut-Schmidt University, Hamburg                                         |
|                                                                                                       |                                                                                                                                |                                                                                                                                                                                                                                                                               | Dr. Anne Toussaint, PhD               | Department of Psychosomatic Medicine and Psychotherapy, UKE                                                   |
|  <b>P6</b>         | Social Inequalities in Aggravating Factors of Persistent Somatic Symptoms                                                      | P6 examines whether socioeconomic and migration status are associated with risk factors for the persistence of irritable bowel syndrome and fatigue.                                                                                                                          | Prof. Dr. Olaf von dem Knesebeck, PhD | Institute of Medical Sociology, UKE                                                                           |
|  <b>Z-Project*</b> | Generic and Disease-Specific Mechanisms of Somatic Symptom Persistence Across Diseases                                         | The Z-Project will oversee the other projects with respect to adherence to the common methodology. The Z-Project will pool data from the individual projects to identify networks of interacting symptoms and mechanisms of symptom persistence across projects and diseases. | Prof. Dr. Antonia Zapf, PhD           | Department of Medical Biometry and Epidemiology, UKE                                                          |

\* Co-applicants: **P2:** PD Dr. Viola Andresen, MD; Prof Dr. Yvonne Nestoriuc, PhD; **P6** and **Z-Project:** Prof. Dr. Bernd Löwe, MD; UKE = Universitätsklinikum Hamburg-Eppendorf (University Medical Centre Hamburg-Eppendorf, Hamburg, Germany)

**Table 2:** Risk factors, mechanisms, and outcomes investigated by the SOMACROSS research unit

| Risk factors and mechanisms (assessed via self-report / laboratory test)   |                                                                                                                                                                             |                                                                                    |            |        |   |    |
|----------------------------------------------------------------------------|-----------------------------------------------------------------------------------------------------------------------------------------------------------------------------|------------------------------------------------------------------------------------|------------|--------|---|----|
| Predisposing, triggering and maintaining /aggravating factors              | Single constructs                                                                                                                                                           | Instrument                                                                         | Items      | Months |   |    |
|                                                                            |                                                                                                                                                                             |                                                                                    |            | 0      | 6 | 12 |
| <b>Sociodemographic factors</b>                                            | Gender, age, nationality, heights, weights, marital status, migration status, current housing situation, insurance, education, occupational status, health care utilization | Single items                                                                       | 19         | X      | X | X  |
| <b>Psychosocial factors</b>                                                | Adverse childhood experiences                                                                                                                                               | Adverse Childhood Experiences Questionnaire (ACE-D)                                | 10         | X      |   |    |
|                                                                            | Personality: neuroticism                                                                                                                                                    | Big Five Inventory -10 (BFI-10)                                                    | 10         | X      |   |    |
|                                                                            | Negative affectivity                                                                                                                                                        | Positive and Negative Affectivity Schedule (PANAS) Perceived Stress Scale (PSS-10) | 20         | X      |   |    |
|                                                                            | Life stressors                                                                                                                                                              | Perceived stigmatization                                                           | 10         | X      |   |    |
| <b>Cognitive-perceptual and emotional mechanisms</b>                       | Somatosensory amplification                                                                                                                                                 | Somatosensory Amplification Scale (SSAS)                                           | 10         | X      | X | X  |
|                                                                            | Catastrophizing                                                                                                                                                             | Coping Strategies Questionnaire - Catastrophizing Subscale (CSQ-CAT)               | 6          | X      | X | X  |
|                                                                            | Treatment expectations                                                                                                                                                      | Treatment Expectation Questionnaire (TEX-Q)                                        | 15         | X      | X | X  |
|                                                                            | Expectation of symptom severity                                                                                                                                             | Numeric Rating Scale                                                               | 1          | X      | X | X  |
|                                                                            | Expectation of symptom burden                                                                                                                                               | Numeric Rating Scale                                                               | 1          | X      | X | X  |
|                                                                            | Expectation of coping with symptoms                                                                                                                                         | Numeric Rating Scale                                                               | 1          | X      | X | X  |
|                                                                            | Psychological burden related to somatic symptoms or associated health concerns                                                                                              | Somatic Symptom Disorder – B Criteria Scale (SSD-12)                               | 12         | X      | X | X  |
|                                                                            | Illness-related worries                                                                                                                                                     | Whiteley-Index Short Version (WI-7)                                                | 7          | X      | X | X  |
|                                                                            | Symptom perception                                                                                                                                                          | Illness perception questionnaire (B-IPQ)                                           | 8          | X      | X | X  |
|                                                                            | Anxiety                                                                                                                                                                     | Generalized Anxiety Disorder-7 (GAD-7)                                             | 7          | X      | X | X  |
|                                                                            | Depression                                                                                                                                                                  | Patient Health Questionnaire-9 (PHQ-9)                                             | 9          | X      | X | X  |
|                                                                            | Alexithymia                                                                                                                                                                 | Toronto Alexithymia Scale (TAS-20)                                                 | 20         | X      |   |    |
| Emotion regulation                                                         | Emotion Regulation Questionnaire (ERQ)                                                                                                                                      | 10                                                                                 | X          |        |   |    |
| <b>Behavioral factors</b>                                                  | Physical inactivity                                                                                                                                                         | International Physical Activity Questionnaire (IPAQ-SF)                            | 7          | X      | X | X  |
| <b>Biomedical and treatment-related factors</b>                            | (Prior) organic disease / comorbidity                                                                                                                                       | Self-Administered Comorbidity Questionnaire (SCQ)                                  | 16         | X      |   |    |
|                                                                            | Medication adherence                                                                                                                                                        | Medication Adherence Report Scale (MARS-D)                                         | 5          | X      |   |    |
|                                                                            | Side effects                                                                                                                                                                | Numeric Rating Scale                                                               | 1          | X      | X | X  |
|                                                                            | Treatment experiences                                                                                                                                                       | Numeric Rating Scale                                                               | 2          | X      | X | X  |
|                                                                            | Systemic inflammation, markers of central sensitization (P1 to P5)                                                                                                          | C-reactive protein (CRP)                                                           |            | X      |   |    |
|                                                                            |                                                                                                                                                                             | Interleukin 6 (IL-6)                                                               |            | X      |   |    |
|                                                                            |                                                                                                                                                                             | Tumor necrosis factor (TNF)                                                        |            | X      |   |    |
|                                                                            | Duration of disease                                                                                                                                                         | Single interview questions                                                         | 2          | X      |   |    |
| Medication                                                                 | Single interview question                                                                                                                                                   | 1                                                                                  | X          | X      | X |    |
| <b>Outcome variables (assessed via self-report / diagnostic interview)</b> |                                                                                                                                                                             |                                                                                    |            |        |   |    |
| <b>Primary outcome: somatic symptoms</b>                                   | Somatic symptom burden                                                                                                                                                      | Patient Health Questionnaire-15 (PHQ-15)                                           | 15         | X      | X | X  |
|                                                                            | Symptom intensity                                                                                                                                                           | EURONET-SOMA Numeric Rating Scale                                                  | 1          | X      | X | X  |
| <b>Secondary outcomes: functioning</b>                                     | Symptom interference                                                                                                                                                        | EURONET-SOMA Numeric Rating Scale                                                  | 1          | X      | X | X  |
|                                                                            | Symptom related disability                                                                                                                                                  | Pain Disability Index – adapted (PDI)                                              | 7          | X      | X | X  |
|                                                                            | Health-related quality of life                                                                                                                                              | Short Form Health Survey (SF-12)                                                   | 12         | X      | X | X  |
| <b>Diagnosis of somatic symptom disorder (DSM-5)</b>                       | Diagnostic classification                                                                                                                                                   | Structured Clinical Interview for the DSM-5 (SCID)                                 | 18         | X      |   | X  |
| <b>TOTAL (self-report items)</b>                                           |                                                                                                                                                                             |                                                                                    | <b>266</b> |        |   |    |

## FIGURE LEGENDS

**Figure 1.** Relevance of Persistent Somatic Symptoms

**Figure 2.** Working model of the SOMACROSS research unit: Risk factors and mechanisms for somatic symptom persistence as investigated by the individual projects (blue numbers indicate projects investigating the respective factors)

**Figure 3.** Projects 1-6 (P1-6): From current state of knowledge to aims of scientific insight

**Figure 4.** Steps forward through the SOMACROSS research unit



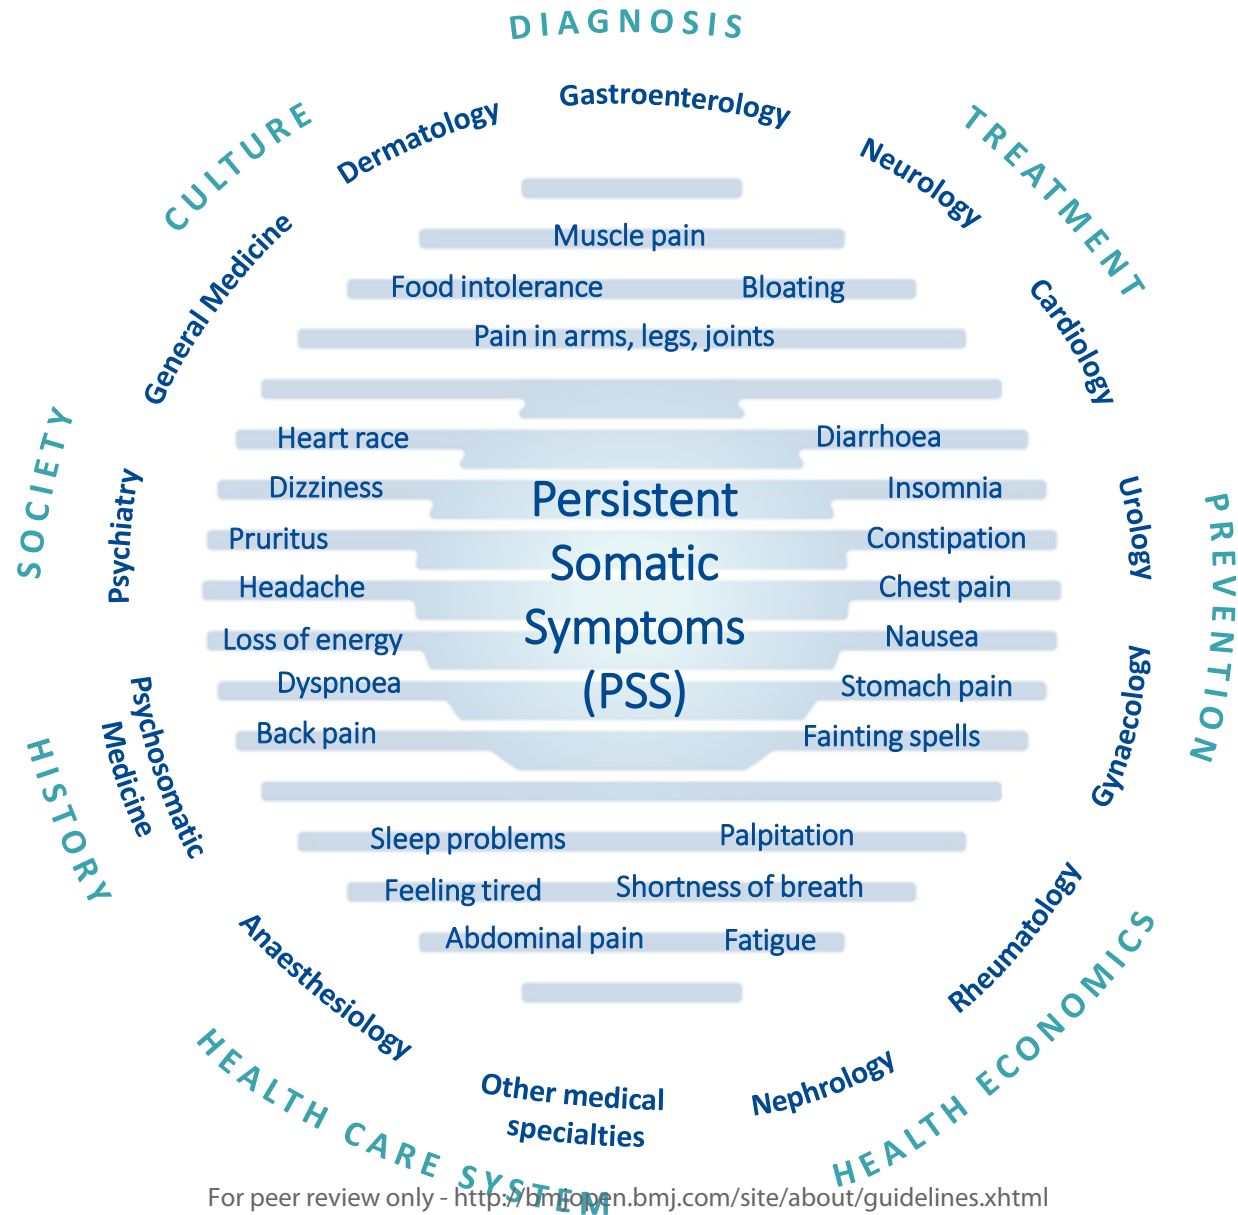

1  
2  
3  
4  
5  
6  
7  
8  
9  
10  
11  
12  
13  
14  
15  
16  
17  
18  
19  
20  
21  
22  
23  
24  
25  
26  
27  
28  
29  
30  
31  
32  
33  
34  
35  
36  
37  
38  
39  
40  
41

**PREDISPOSING FACTORS      TRIGGERING FACTORS      MAINTAINING / AGGRAVATING FACTORS**





1  
2  
3  
4  
5  
6  
7  
8  
9  
10  
11  
12  
13  
14  
15  
16  
17  
18  
19  
20  
21  
22  
23  
24  
25  
26  
27  
28  
29  
30  
31  
32  
33  
34  
35  
36  
37  
38  
39  
40  
41

## Science

**INSIGHTS**  
Risk factors and mechanisms

**CROSSVALIDATION**  
Disease-specific and generic mechanisms

**DEVELOPMENT**  
Mechanism-based interventions

## Clinical care

**PREVENTION**  
Early recognition through risk scores

**TREATMENT**  
More targeted treatment by addressing mechanisms of action

**INTERDISCIPLINARITY**  
Better collaboration in patient care

## Competence building

**STRUCTURE**  
Collaboration through RU framework

**MUTUAL LEARNING**  
Communication between projects and targeted training

**EARLY CAREER**  
Fostering research careers within RU



SPIRIT 2013 Checklist: Recommended items to address in a clinical trial protocol and related documents\*

| Section/item                      | Item No | Description                                                                                                                                                                                                                                                                              | Addressed on page number                                                                                                                     |
|-----------------------------------|---------|------------------------------------------------------------------------------------------------------------------------------------------------------------------------------------------------------------------------------------------------------------------------------------------|----------------------------------------------------------------------------------------------------------------------------------------------|
| <b>Administrative information</b> |         |                                                                                                                                                                                                                                                                                          |                                                                                                                                              |
| Title                             | 1       | Descriptive title identifying the study design, population, interventions, and, if applicable, trial acronym                                                                                                                                                                             | 1                                                                                                                                            |
| Trial registration                | 2a      | Trial identifier and registry name. If not yet registered, name of intended registry                                                                                                                                                                                                     | N/A – individual studies of research unit will be registered before start of recruitment (not this overall description of the research unit) |
|                                   | 2b      | All items from the World Health Organization Trial Registration Data Set                                                                                                                                                                                                                 | N/A see above                                                                                                                                |
| Protocol version                  | 3       | Date and version identifier                                                                                                                                                                                                                                                              | 1                                                                                                                                            |
| Funding                           | 4       | Sources and types of financial, material, and other support                                                                                                                                                                                                                              | 21                                                                                                                                           |
| Roles and responsibilities        | 5a      | Names, affiliations, and roles of protocol contributors                                                                                                                                                                                                                                  | 21                                                                                                                                           |
|                                   | 5b      | Name and contact information for the trial sponsor                                                                                                                                                                                                                                       | 21                                                                                                                                           |
|                                   | 5c      | Role of study sponsor and funders, if any, in study design; collection, management, analysis, and interpretation of data; writing of the report; and the decision to submit the report for publication, including whether they will have ultimate authority over any of these activities | 21                                                                                                                                           |

1  
2  
3  
4  
5  
6  
7  
8  
9  
10  
11  
12  
13  
14  
15  
16  
17  
18  
19  
20  
21  
22  
23  
24  
25  
26  
27  
28  
29  
30  
31  
32  
33  
34  
35  
36  
37  
38  
39  
40  
41  
42  
43  
44  
45  
46

|  |    |                                                                                                                                                                                                                                                                  |    |
|--|----|------------------------------------------------------------------------------------------------------------------------------------------------------------------------------------------------------------------------------------------------------------------|----|
|  | 5d | Composition, roles, and responsibilities of the coordinating centre, steering committee, endpoint adjudication committee, data management team, and other individuals or groups overseeing the trial, if applicable (see Item 21a for data monitoring committee) | 21 |
|--|----|------------------------------------------------------------------------------------------------------------------------------------------------------------------------------------------------------------------------------------------------------------------|----|

**Introduction**

|                          |    |                                                                                                                                                                                                    |      |
|--------------------------|----|----------------------------------------------------------------------------------------------------------------------------------------------------------------------------------------------------|------|
| Background and rationale | 6a | Description of research question and justification for undertaking the trial, including summary of relevant studies (published and unpublished) examining benefits and harms for each intervention | 6-13 |
|--------------------------|----|----------------------------------------------------------------------------------------------------------------------------------------------------------------------------------------------------|------|

|  |    |                                       |      |
|--|----|---------------------------------------|------|
|  | 6b | Explanation for choice of comparators | 9-13 |
|--|----|---------------------------------------|------|

|            |   |                                   |       |
|------------|---|-----------------------------------|-------|
| Objectives | 7 | Specific objectives or hypotheses | 13-14 |
|------------|---|-----------------------------------|-------|

|              |   |                                                                                                                                                                                                           |       |
|--------------|---|-----------------------------------------------------------------------------------------------------------------------------------------------------------------------------------------------------------|-------|
| Trial design | 8 | Description of trial design including type of trial (eg, parallel group, crossover, factorial, single group), allocation ratio, and framework (eg, superiority, equivalence, noninferiority, exploratory) | 14-18 |
|--------------|---|-----------------------------------------------------------------------------------------------------------------------------------------------------------------------------------------------------------|-------|

**Methods: Participants, interventions, and outcomes**

|               |   |                                                                                                                                                                                    |       |
|---------------|---|------------------------------------------------------------------------------------------------------------------------------------------------------------------------------------|-------|
| Study setting | 9 | Description of study settings (eg, community clinic, academic hospital) and list of countries where data will be collected. Reference to where list of study sites can be obtained | 14-15 |
|---------------|---|------------------------------------------------------------------------------------------------------------------------------------------------------------------------------------|-------|

|                      |    |                                                                                                                                                                                              |       |
|----------------------|----|----------------------------------------------------------------------------------------------------------------------------------------------------------------------------------------------|-------|
| Eligibility criteria | 10 | Inclusion and exclusion criteria for participants. If applicable, eligibility criteria for study centres and individuals who will perform the interventions (eg, surgeons, psychotherapists) | 15-16 |
|----------------------|----|----------------------------------------------------------------------------------------------------------------------------------------------------------------------------------------------|-------|

|               |     |                                                                                                                            |                                                                                              |
|---------------|-----|----------------------------------------------------------------------------------------------------------------------------|----------------------------------------------------------------------------------------------|
| Interventions | 11a | Interventions for each group with sufficient detail to allow replication, including how and when they will be administered | N/A – this is an overall study protocol for a research unit, not for an interventional study |
|---------------|-----|----------------------------------------------------------------------------------------------------------------------------|----------------------------------------------------------------------------------------------|

|    |                      |     |                                                                                                                                                                                                                                                                                                                                                                                |                                                                          |
|----|----------------------|-----|--------------------------------------------------------------------------------------------------------------------------------------------------------------------------------------------------------------------------------------------------------------------------------------------------------------------------------------------------------------------------------|--------------------------------------------------------------------------|
| 1  |                      | 11b | Criteria for discontinuing or modifying allocated interventions for a given trial participant (eg, drug dose change in response to harms, participant request, or improving/worsening disease)                                                                                                                                                                                 | N/A – described in individual study protocols of SOMACROSS research unit |
| 2  |                      |     |                                                                                                                                                                                                                                                                                                                                                                                |                                                                          |
| 3  |                      |     |                                                                                                                                                                                                                                                                                                                                                                                |                                                                          |
| 4  |                      |     |                                                                                                                                                                                                                                                                                                                                                                                |                                                                          |
| 5  |                      |     |                                                                                                                                                                                                                                                                                                                                                                                |                                                                          |
| 6  |                      |     |                                                                                                                                                                                                                                                                                                                                                                                |                                                                          |
| 7  |                      | 11c | Strategies to improve adherence to intervention protocols, and any procedures for monitoring adherence (eg, drug tablet return, laboratory tests)                                                                                                                                                                                                                              | N/A – see above                                                          |
| 8  |                      |     |                                                                                                                                                                                                                                                                                                                                                                                |                                                                          |
| 9  |                      | 11d | Relevant concomitant care and interventions that are permitted or prohibited during the trial                                                                                                                                                                                                                                                                                  | N/A – see above                                                          |
| 10 |                      |     |                                                                                                                                                                                                                                                                                                                                                                                |                                                                          |
| 11 |                      |     |                                                                                                                                                                                                                                                                                                                                                                                |                                                                          |
| 12 |                      |     |                                                                                                                                                                                                                                                                                                                                                                                |                                                                          |
| 13 | Outcomes             | 12  | Primary, secondary, and other outcomes, including the specific measurement variable (eg, systolic blood pressure), analysis metric (eg, change from baseline, final value, time to event), method of aggregation (eg, median, proportion), and time point for each outcome. Explanation of the clinical relevance of chosen efficacy and harm outcomes is strongly recommended | 16-17                                                                    |
| 14 |                      |     |                                                                                                                                                                                                                                                                                                                                                                                |                                                                          |
| 15 |                      |     |                                                                                                                                                                                                                                                                                                                                                                                |                                                                          |
| 16 |                      |     |                                                                                                                                                                                                                                                                                                                                                                                |                                                                          |
| 17 |                      |     |                                                                                                                                                                                                                                                                                                                                                                                |                                                                          |
| 18 |                      |     |                                                                                                                                                                                                                                                                                                                                                                                |                                                                          |
| 19 | Participant timeline | 13  | Time schedule of enrolment, interventions (including any run-ins and washouts), assessments, and visits for participants. A schematic diagram is highly recommended (see Figure)                                                                                                                                                                                               | N/A – see above                                                          |
| 20 |                      |     |                                                                                                                                                                                                                                                                                                                                                                                |                                                                          |
| 21 |                      |     |                                                                                                                                                                                                                                                                                                                                                                                |                                                                          |
| 22 | Sample size          | 14  | Estimated number of participants needed to achieve study objectives and how it was determined, including clinical and statistical assumptions supporting any sample size calculations                                                                                                                                                                                          | 18 – described in individual study protocols of SOMACROSS research unit  |
| 23 |                      |     |                                                                                                                                                                                                                                                                                                                                                                                |                                                                          |
| 24 |                      |     |                                                                                                                                                                                                                                                                                                                                                                                |                                                                          |
| 25 |                      |     |                                                                                                                                                                                                                                                                                                                                                                                |                                                                          |
| 26 |                      |     |                                                                                                                                                                                                                                                                                                                                                                                |                                                                          |
| 27 |                      |     |                                                                                                                                                                                                                                                                                                                                                                                |                                                                          |
| 28 |                      |     |                                                                                                                                                                                                                                                                                                                                                                                |                                                                          |
| 29 | Recruitment          | 15  | Strategies for achieving adequate participant enrolment to reach target sample size                                                                                                                                                                                                                                                                                            | N/A – see above                                                          |
| 30 |                      |     |                                                                                                                                                                                                                                                                                                                                                                                |                                                                          |

### Methods: Assignment of interventions (for controlled trials)

#### Allocation:

|    |                     |     |                                                                                                                                                                                                                                                                                                                                                          |                                                                          |
|----|---------------------|-----|----------------------------------------------------------------------------------------------------------------------------------------------------------------------------------------------------------------------------------------------------------------------------------------------------------------------------------------------------------|--------------------------------------------------------------------------|
| 35 | Sequence generation | 16a | Method of generating the allocation sequence (eg, computer-generated random numbers), and list of any factors for stratification. To reduce predictability of a random sequence, details of any planned restriction (eg, blocking) should be provided in a separate document that is unavailable to those who enrol participants or assign interventions | N/A – described in individual study protocols of SOMACROSS research unit |
| 36 |                     |     |                                                                                                                                                                                                                                                                                                                                                          |                                                                          |
| 37 |                     |     |                                                                                                                                                                                                                                                                                                                                                          |                                                                          |
| 38 |                     |     |                                                                                                                                                                                                                                                                                                                                                          |                                                                          |
| 39 |                     |     |                                                                                                                                                                                                                                                                                                                                                          |                                                                          |
| 40 |                     |     |                                                                                                                                                                                                                                                                                                                                                          |                                                                          |
| 41 |                     |     |                                                                                                                                                                                                                                                                                                                                                          |                                                                          |
| 42 |                     |     |                                                                                                                                                                                                                                                                                                                                                          |                                                                          |

|    |                    |     |                                                                                                              |                 |
|----|--------------------|-----|--------------------------------------------------------------------------------------------------------------|-----------------|
| 1  | Allocation         | 16b | Mechanism of implementing the allocation sequence (eg, central telephone; sequentially numbered,             | N/A – see above |
| 2  | concealment        |     | opaque, sealed envelopes), describing any steps to conceal the sequence until interventions are assigned     |                 |
| 3  | mechanism          |     |                                                                                                              |                 |
| 4  |                    |     |                                                                                                              |                 |
| 5  | Implementation     | 16c | Who will generate the allocation sequence, who will enrol participants, and who will assign participants to  | N/A – see above |
| 6  |                    |     | interventions                                                                                                |                 |
| 7  |                    |     |                                                                                                              |                 |
| 8  | Blinding (masking) | 17a | Who will be blinded after assignment to interventions (eg, trial participants, care providers, outcome       | N/A – see above |
| 9  |                    |     | assessors, data analysts), and how                                                                           |                 |
| 10 |                    |     |                                                                                                              |                 |
| 11 |                    | 17b | If blinded, circumstances under which unblinding is permissible, and procedure for revealing a participant’s | N/A – see above |
| 12 |                    |     | allocated intervention during the trial                                                                      |                 |
| 13 |                    |     |                                                                                                              |                 |
| 14 |                    |     |                                                                                                              |                 |

**Methods: Data collection, management, and analysis**

|    |                         |     |                                                                                                               |                    |
|----|-------------------------|-----|---------------------------------------------------------------------------------------------------------------|--------------------|
| 15 |                         |     |                                                                                                               |                    |
| 16 |                         |     |                                                                                                               |                    |
| 17 | Data collection methods | 18a | Plans for assessment and collection of outcome, baseline, and other trial data, including any related         | 15-17, Table 2     |
| 18 |                         |     | processes to promote data quality (eg, duplicate measurements, training of assessors) and a description of    |                    |
| 19 |                         |     | study instruments (eg, questionnaires, laboratory tests) along with their reliability and validity, if known. |                    |
| 20 |                         |     | Reference to where data collection forms can be found, if not in the protocol                                 |                    |
| 21 |                         |     |                                                                                                               |                    |
| 22 |                         | 18b | Plans to promote participant retention and complete follow-up, including list of any outcome data to be       | N/A – described in |
| 23 |                         |     | collected for participants who discontinue or deviate from intervention protocols                             | individual study   |
| 24 |                         |     |                                                                                                               | protocols of       |
| 25 |                         |     |                                                                                                               | SOMACROSS          |
| 26 |                         |     |                                                                                                               | research unit      |
| 27 |                         |     |                                                                                                               |                    |
| 28 | Data management         | 19  | Plans for data entry, coding, security, and storage, including any related processes to promote data quality  | 18                 |
| 29 |                         |     | (eg, double data entry; range checks for data values). Reference to where details of data management          |                    |
| 30 |                         |     | procedures can be found, if not in the protocol                                                               |                    |
| 31 |                         |     |                                                                                                               |                    |
| 32 | Statistical methods     | 20a | Statistical methods for analysing primary and secondary outcomes. Reference to where other details of the     | 18                 |
| 33 |                         |     | statistical analysis plan can be found, if not in the protocol                                                |                    |
| 34 |                         |     |                                                                                                               |                    |
| 35 |                         |     |                                                                                                               |                    |
| 36 |                         |     |                                                                                                               |                    |
| 37 |                         |     |                                                                                                               |                    |
| 38 |                         |     |                                                                                                               |                    |
| 39 |                         |     |                                                                                                               |                    |
| 40 |                         |     |                                                                                                               |                    |
| 41 |                         |     |                                                                                                               |                    |
| 42 |                         |     |                                                                                                               |                    |



|    |     |                                                                                                                                                                                 |                                                                         |
|----|-----|---------------------------------------------------------------------------------------------------------------------------------------------------------------------------------|-------------------------------------------------------------------------|
| 1  | 20b | Methods for any additional analyses (eg, subgroup and adjusted analyses)                                                                                                        | 18 – described in individual study protocols of SOMACROSS research unit |
| 2  |     |                                                                                                                                                                                 |                                                                         |
| 3  |     |                                                                                                                                                                                 |                                                                         |
| 4  |     |                                                                                                                                                                                 |                                                                         |
| 5  |     |                                                                                                                                                                                 |                                                                         |
| 6  |     |                                                                                                                                                                                 |                                                                         |
| 7  |     |                                                                                                                                                                                 |                                                                         |
| 8  | 20c | Definition of analysis population relating to protocol non-adherence (eg, as randomised analysis), and any statistical methods to handle missing data (eg, multiple imputation) | N/A – see above                                                         |
| 9  |     |                                                                                                                                                                                 |                                                                         |
| 10 |     |                                                                                                                                                                                 |                                                                         |

### Methods: Monitoring

|    |                 |     |                                                                                                                                                                                                                                                                                                                                       |                 |
|----|-----------------|-----|---------------------------------------------------------------------------------------------------------------------------------------------------------------------------------------------------------------------------------------------------------------------------------------------------------------------------------------|-----------------|
| 11 |                 |     |                                                                                                                                                                                                                                                                                                                                       |                 |
| 12 |                 |     |                                                                                                                                                                                                                                                                                                                                       |                 |
| 13 |                 |     |                                                                                                                                                                                                                                                                                                                                       |                 |
| 14 | Data monitoring | 21a | Composition of data monitoring committee (DMC); summary of its role and reporting structure; statement of whether it is independent from the sponsor and competing interests; and reference to where further details about its charter can be found, if not in the protocol. Alternatively, an explanation of why a DMC is not needed | N/A – see above |
| 15 |                 |     |                                                                                                                                                                                                                                                                                                                                       |                 |
| 16 |                 |     |                                                                                                                                                                                                                                                                                                                                       |                 |
| 17 |                 |     |                                                                                                                                                                                                                                                                                                                                       |                 |
| 18 |                 |     |                                                                                                                                                                                                                                                                                                                                       |                 |
| 19 |                 | 21b | Description of any interim analyses and stopping guidelines, including who will have access to these interim results and make the final decision to terminate the trial                                                                                                                                                               | N/A – see above |
| 20 |                 |     |                                                                                                                                                                                                                                                                                                                                       |                 |
| 21 |                 |     |                                                                                                                                                                                                                                                                                                                                       |                 |
| 22 | Harms           | 22  | Plans for collecting, assessing, reporting, and managing solicited and spontaneously reported adverse events and other unintended effects of trial interventions or trial conduct                                                                                                                                                     | N/A – see above |
| 23 |                 |     |                                                                                                                                                                                                                                                                                                                                       |                 |
| 24 |                 |     |                                                                                                                                                                                                                                                                                                                                       |                 |
| 25 |                 |     |                                                                                                                                                                                                                                                                                                                                       |                 |
| 26 | Auditing        | 23  | Frequency and procedures for auditing trial conduct, if any, and whether the process will be independent from investigators and the sponsor                                                                                                                                                                                           | N/A – see above |
| 27 |                 |     |                                                                                                                                                                                                                                                                                                                                       |                 |
| 28 |                 |     |                                                                                                                                                                                                                                                                                                                                       |                 |

### Ethics and dissemination

|    |                          |    |                                                                                                                                                                                                                                  |                                                                         |
|----|--------------------------|----|----------------------------------------------------------------------------------------------------------------------------------------------------------------------------------------------------------------------------------|-------------------------------------------------------------------------|
| 29 |                          |    |                                                                                                                                                                                                                                  |                                                                         |
| 30 |                          |    |                                                                                                                                                                                                                                  |                                                                         |
| 31 | Research ethics approval | 24 | Plans for seeking research ethics committee/institutional review board (REC/IRB) approval                                                                                                                                        | 19                                                                      |
| 32 |                          |    |                                                                                                                                                                                                                                  |                                                                         |
| 33 |                          |    |                                                                                                                                                                                                                                  |                                                                         |
| 34 | Protocol amendments      | 25 | Plans for communicating important protocol modifications (eg, changes to eligibility criteria, outcomes, analyses) to relevant parties (eg, investigators, REC/IRBs, trial participants, trial registries, journals, regulators) | 18 – described in individual study protocols of SOMACROSS research unit |
| 35 |                          |    |                                                                                                                                                                                                                                  |                                                                         |
| 36 |                          |    |                                                                                                                                                                                                                                  |                                                                         |
| 37 |                          |    |                                                                                                                                                                                                                                  |                                                                         |
| 38 |                          |    |                                                                                                                                                                                                                                  |                                                                         |
| 39 |                          |    |                                                                                                                                                                                                                                  |                                                                         |
| 40 |                          |    |                                                                                                                                                                                                                                  |                                                                         |
| 41 |                          |    |                                                                                                                                                                                                                                  |                                                                         |
| 42 |                          |    |                                                                                                                                                                                                                                  |                                                                         |

|    |                               |     |                                                                                                                                                                                                                                                                                     |                                                                         |
|----|-------------------------------|-----|-------------------------------------------------------------------------------------------------------------------------------------------------------------------------------------------------------------------------------------------------------------------------------------|-------------------------------------------------------------------------|
| 1  | Consent or assent             | 26a | Who will obtain informed consent or assent from potential trial participants or authorised surrogates, and how (see Item 32)                                                                                                                                                        | N/A – see above                                                         |
| 2  |                               |     |                                                                                                                                                                                                                                                                                     |                                                                         |
| 3  |                               |     |                                                                                                                                                                                                                                                                                     |                                                                         |
| 4  |                               | 26b | Additional consent provisions for collection and use of participant data and biological specimens in ancillary studies, if applicable                                                                                                                                               | N/A – see above                                                         |
| 5  |                               |     |                                                                                                                                                                                                                                                                                     |                                                                         |
| 6  |                               |     |                                                                                                                                                                                                                                                                                     |                                                                         |
| 7  | Confidentiality               | 27  | How personal information about potential and enrolled participants will be collected, shared, and maintained in order to protect confidentiality before, during, and after the trial                                                                                                | N/A – see above                                                         |
| 8  |                               |     |                                                                                                                                                                                                                                                                                     |                                                                         |
| 9  |                               |     |                                                                                                                                                                                                                                                                                     |                                                                         |
| 10 | Declaration of interests      | 28  | Financial and other competing interests for principal investigators for the overall trial and each study site                                                                                                                                                                       | 22                                                                      |
| 11 |                               |     |                                                                                                                                                                                                                                                                                     |                                                                         |
| 12 |                               |     |                                                                                                                                                                                                                                                                                     |                                                                         |
| 13 | Access to data                | 29  | Statement of who will have access to the final trial dataset, and disclosure of contractual agreements that limit such access for investigators                                                                                                                                     | 18 – described in individual study protocols of SOMACROSS research unit |
| 14 |                               |     |                                                                                                                                                                                                                                                                                     |                                                                         |
| 15 |                               |     |                                                                                                                                                                                                                                                                                     |                                                                         |
| 16 |                               |     |                                                                                                                                                                                                                                                                                     |                                                                         |
| 17 |                               |     |                                                                                                                                                                                                                                                                                     |                                                                         |
| 18 |                               |     |                                                                                                                                                                                                                                                                                     |                                                                         |
| 19 |                               |     |                                                                                                                                                                                                                                                                                     |                                                                         |
| 20 | Ancillary and post-trial care | 30  | Provisions, if any, for ancillary and post-trial care, and for compensation to those who suffer harm from trial participation                                                                                                                                                       | N/A – proband insurance was concluded                                   |
| 21 |                               |     |                                                                                                                                                                                                                                                                                     |                                                                         |
| 22 |                               |     |                                                                                                                                                                                                                                                                                     |                                                                         |
| 23 |                               |     |                                                                                                                                                                                                                                                                                     |                                                                         |
| 24 |                               |     |                                                                                                                                                                                                                                                                                     |                                                                         |
| 25 | Dissemination policy          | 31a | Plans for investigators and sponsor to communicate trial results to participants, healthcare professionals, the public, and other relevant groups (eg, via publication, reporting in results databases, or other data sharing arrangements), including any publication restrictions | 19-20                                                                   |
| 26 |                               |     |                                                                                                                                                                                                                                                                                     |                                                                         |
| 27 |                               |     |                                                                                                                                                                                                                                                                                     |                                                                         |
| 28 |                               |     |                                                                                                                                                                                                                                                                                     |                                                                         |
| 29 |                               | 31b | Authorship eligibility guidelines and any intended use of professional writers                                                                                                                                                                                                      | N/A                                                                     |
| 30 |                               |     |                                                                                                                                                                                                                                                                                     |                                                                         |
| 31 |                               | 31c | Plans, if any, for granting public access to the full protocol, participant-level dataset, and statistical code                                                                                                                                                                     | 19-20                                                                   |
| 32 |                               |     |                                                                                                                                                                                                                                                                                     |                                                                         |
| 33 |                               |     |                                                                                                                                                                                                                                                                                     |                                                                         |

34 **Appendices**

35  
36  
37  
38  
39  
40  
41  
42  
43  
44  
45  
46

|    |                            |    |                                                                                                                                                                                                |                                                                                       |
|----|----------------------------|----|------------------------------------------------------------------------------------------------------------------------------------------------------------------------------------------------|---------------------------------------------------------------------------------------|
| 1  | Informed consent materials | 32 | Model consent form and other related documentation given to participants and authorised surrogates                                                                                             | 15, 19 – described in detail in individual study protocols of SOMACROSS research unit |
| 2  |                            |    |                                                                                                                                                                                                |                                                                                       |
| 3  |                            |    |                                                                                                                                                                                                |                                                                                       |
| 4  |                            |    |                                                                                                                                                                                                |                                                                                       |
| 5  |                            |    |                                                                                                                                                                                                |                                                                                       |
| 6  |                            |    |                                                                                                                                                                                                |                                                                                       |
| 7  |                            |    |                                                                                                                                                                                                |                                                                                       |
| 8  |                            |    |                                                                                                                                                                                                |                                                                                       |
| 9  | Biological specimens       | 33 | Plans for collection, laboratory evaluation, and storage of biological specimens for genetic or molecular analysis in the current trial and for future use in ancillary studies, if applicable | 17– described in detail in individual study protocols of SOMACROSS research unit      |
| 10 |                            |    |                                                                                                                                                                                                |                                                                                       |
| 11 |                            |    |                                                                                                                                                                                                |                                                                                       |
| 12 |                            |    |                                                                                                                                                                                                |                                                                                       |
| 13 |                            |    |                                                                                                                                                                                                |                                                                                       |
| 14 |                            |    |                                                                                                                                                                                                |                                                                                       |
| 15 |                            |    |                                                                                                                                                                                                |                                                                                       |

\*It is strongly recommended that this checklist be read in conjunction with the SPIRIT 2013 Explanation & Elaboration for important clarification on the items. Amendments to the protocol should be tracked and dated. The SPIRIT checklist is copyrighted by the SPIRIT Group under the Creative Commons [“Attribution-NonCommercial-NoDerivs 3.0 Unported”](https://creativecommons.org/licenses/by-nc-nd/3.0/) license.
