# Supplementary material for: Persistent SOMAtic symptoms ACROSS diseases — from risk factors to modification: scientific framework and overarching protocol of the interdisciplinary SOMACROSS research unit (RU 5211)
Source: PubMed Central journal article supplement — BMJ Open. 2022 Jan 21;12(1):e057596. doi: 10.1136/bmjopen-2021-057596 (PMC8785206; doi:10.1136/bmjopen-2021-057596), 2022-01-21
Supplement: bmjopen-2021-057596.reviewer_comments.pdf [file bmjopen-2021-057596.reviewer_comments.pdf]

## PEER REVIEW HISTORY

BMJ Open publishes all reviews undertaken for accepted manuscripts. Reviewers are asked to complete a checklist review form (<http://bmjopen.bmj.com/site/about/resources/checklist.pdf>) and are provided with free text boxes to elaborate on their assessment. These free text comments are reproduced below.

## ARTICLE DETAILS

|                            |                                                                                                                                                                                                                                                                                      |
|----------------------------|--------------------------------------------------------------------------------------------------------------------------------------------------------------------------------------------------------------------------------------------------------------------------------------|
| <b>TITLE (PROVISIONAL)</b> | Persistent SOMAtic Symptoms ACROSS Diseases - From Risk Factors to Modification: Scientific Framework and Overarching Protocol of the Interdisciplinary SOMACROSS Research Unit (RU 5211)                                                                                            |
| <b>AUTHORS</b>             | Löwe, Bernd; Andresen, Viola; Van den Bergh, Omer; Huber, Tobias B.; von dem Knesebeck, Olaf; Lohse, Ansgar W.; Nestoriuc, Yvonne; Schneider, Gudrun; Schneider, Stefan W.; Schramm, Christoph; Ständer, Sonja; Vettorazzi, Eik; Zapf, Antonia; Shedden-Mora, Meike; Toussaint, Anne |

This article was not externally reviewed at BMJ Open. Protocols that have been independently assessed prior to submission to BMJ Open are usually fast-tracked to publication on the grounds that further substantial changes will not be possible. This independent assessment will usually be external, independent review for both a substantial grant award from a non-commercial or government funder and ethics approval.
